# Supplementary material
Source: PubMed Central journal article supplement (PMC8559303)
Supplement: mmc1.pdf [file mmc1.pdf]

## **Supporting Information**

### **Novel Nucleocapsid Protein-Targeting Phenanthridine inhibitors of SARS-CoV-2**

Yi-Ting Wang, Xin-Yan Long, Xiao Ding, Shi-Rui Fan, Jie-Yun Cai, Bi-Juan Yang,  
Xin-Fang Zhang, Lian Yang, Rong-hua Luo, Ting Ruan, Juan Ren, Chen-Xu Jing,  
Yong-Tang Zheng, Xiao-Jiang Hao, and Duo-Zhi Chen

## Table of contents

|                                                                                                                                                                                                                                                                                 |    |
|---------------------------------------------------------------------------------------------------------------------------------------------------------------------------------------------------------------------------------------------------------------------------------|----|
| NMR, HRESIMS and HPLC spectrums of compounds.....                                                                                                                                                                                                                               | 3  |
| Preparation of intermediates .....                                                                                                                                                                                                                                              | 38 |
| Characterization data of intermediates .....                                                                                                                                                                                                                                    | 41 |
| Amino acid and nucleotide sequences in this study .....                                                                                                                                                                                                                         | 44 |
| Figure S1: Two dimensional (2D) of binding modes of the six model moleculars (M1-6) with SARS-CoV-2 N-NTD. The estimated binding free energies are: -6.2 kcal/mol (M1), -5.6 kcal/mol (M2), -5.7 kcal/mol (M3), -5.8 kcal/mol (M4), -5.9 kcal/mol (M5), -5.2 kcal/mol (M6)..... | 49 |
| Figure S2: SARS-CoV-2 Npro binding level screening of compounds 1-17. ....                                                                                                                                                                                                      | 50 |
| Figure S3: Docking modes of compound 12 (left) and 16 (right) with three potential pockets of SARS-CoV-2 Npro. ....                                                                                                                                                             | 51 |
| Figure S4: The analysis data of mutant A-C after purification. ....                                                                                                                                                                                                             | 52 |
| Figure S5: The affinity fitting curves of mutant A-B with compound 12 or 16. ..                                                                                                                                                                                                 | 53 |
| Table S1. The SPR RU values of Phenanthridine Compounds.....                                                                                                                                                                                                                    | 54 |
| Table S2. The Viability of SARS-Cov-2 Infected Cell After Treatment of Phenanthridine Compounds .....                                                                                                                                                                           | 55 |
| Table S3 The Inhibition of Phenanthridine Compounds on SARS-Cov-2 .....                                                                                                                                                                                                         | 56 |
| Table S4. The EC <sub>50</sub> Value of Compound 12 and 16. ....                                                                                                                                                                                                                | 57 |
| References.....                                                                                                                                                                                                                                                                 | 58 |

# $^1\text{H}$ NMR, $^{13}\text{C}$ NMR and HRESIMS spectrums of compound 1-17

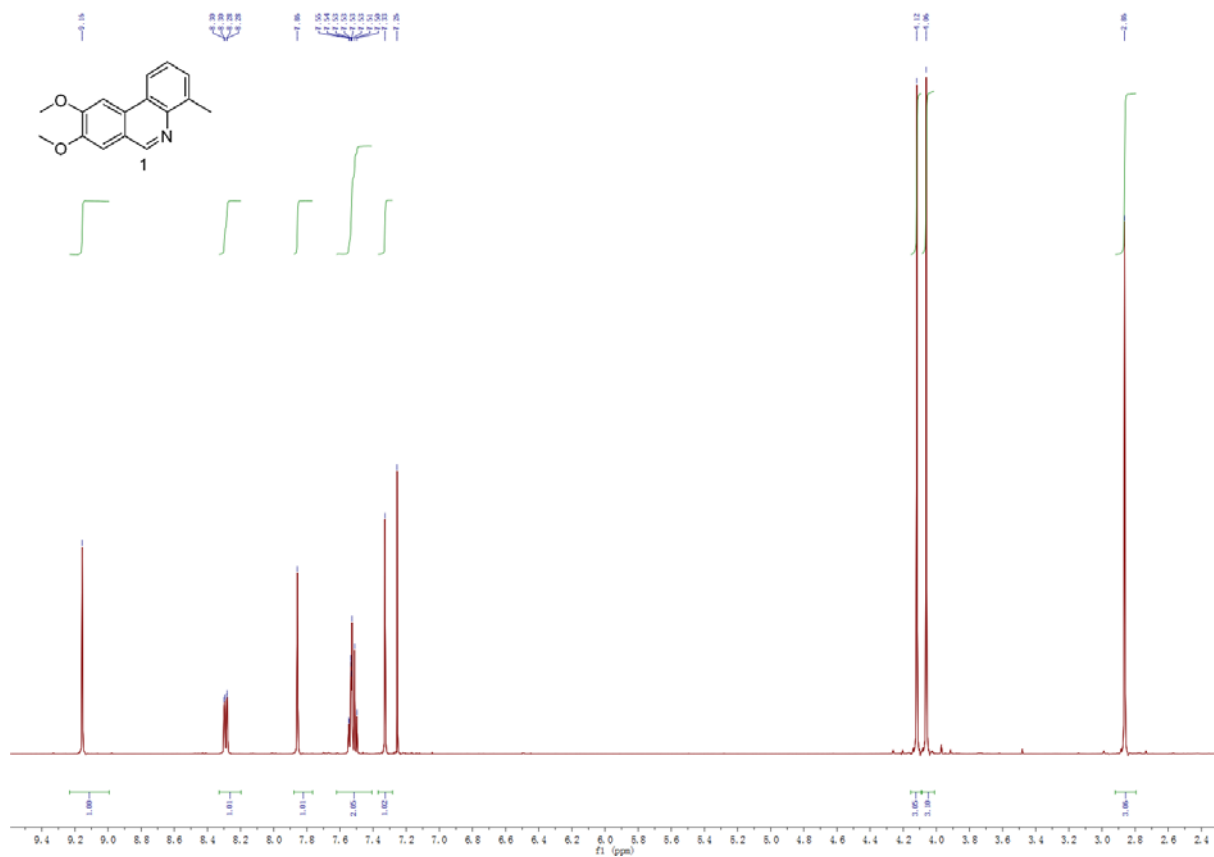

$^1\text{H}$  NMR (500 MHz) spectrum of compound 1 in  $\text{CDCl}_3$ .

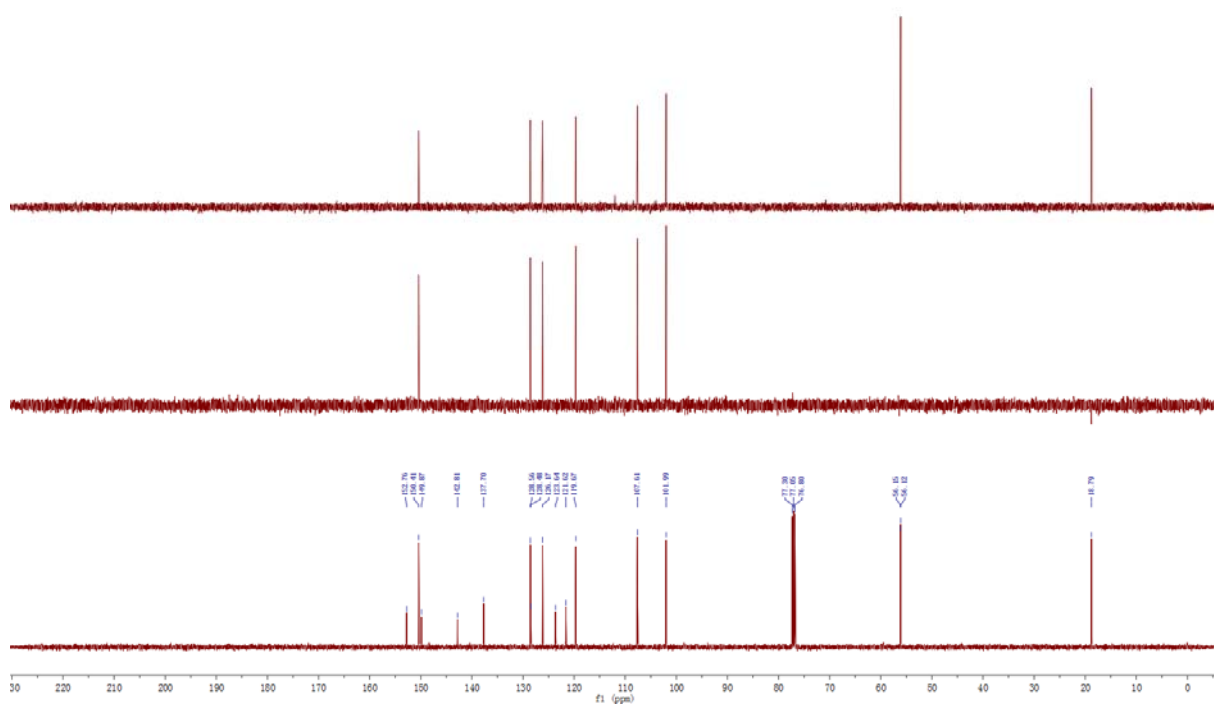

$^{13}\text{C}$  NMR (125 MHz) spectrum of compound 1 in  $\text{CDCl}_3$ .

### User Spectra

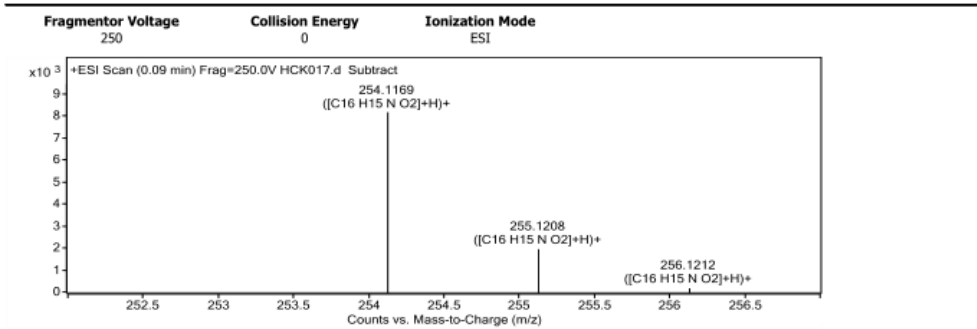

#### Peak List

| m/z      | z | Abund    | Formula      | Ion    |
|----------|---|----------|--------------|--------|
| 180.0794 |   | 3579.74  |              |        |
| 181.0875 | 1 | 11528.31 |              |        |
| 182.0942 | 1 | 3539.19  |              |        |
| 192.08   |   | 3003.92  |              |        |
| 193.0874 | 1 | 3884.09  |              |        |
| 209.083  |   | 8704.47  |              |        |
| 210.0902 | 1 | 24065.34 |              |        |
| 238.0853 | 1 | 35597    |              |        |
| 239.0912 | 1 | 10833.75 |              |        |
| 254.1169 | 1 | 8176.08  | C16 H15 N O2 | (M+H)+ |

#### Formula Calculator Element Limits

| Element | Min | Max |
|---------|-----|-----|
| C       | 3   | 60  |
| H       | 0   | 120 |
| O       | 0   | 30  |
| N       | 0   | 5   |

#### Formula Calculator Results

| Formula      | CalculatedMass | CalculatedMz | Mz       | Diff. (mDa) | Diff. (ppm) | DBE     |
|--------------|----------------|--------------|----------|-------------|-------------|---------|
| C16 H15 N O2 | 253.1103       | 254.1176     | 254.1169 | 0.70        | 2.75        | 10.0000 |

HRESI (+) MS spectrum of compound 1.

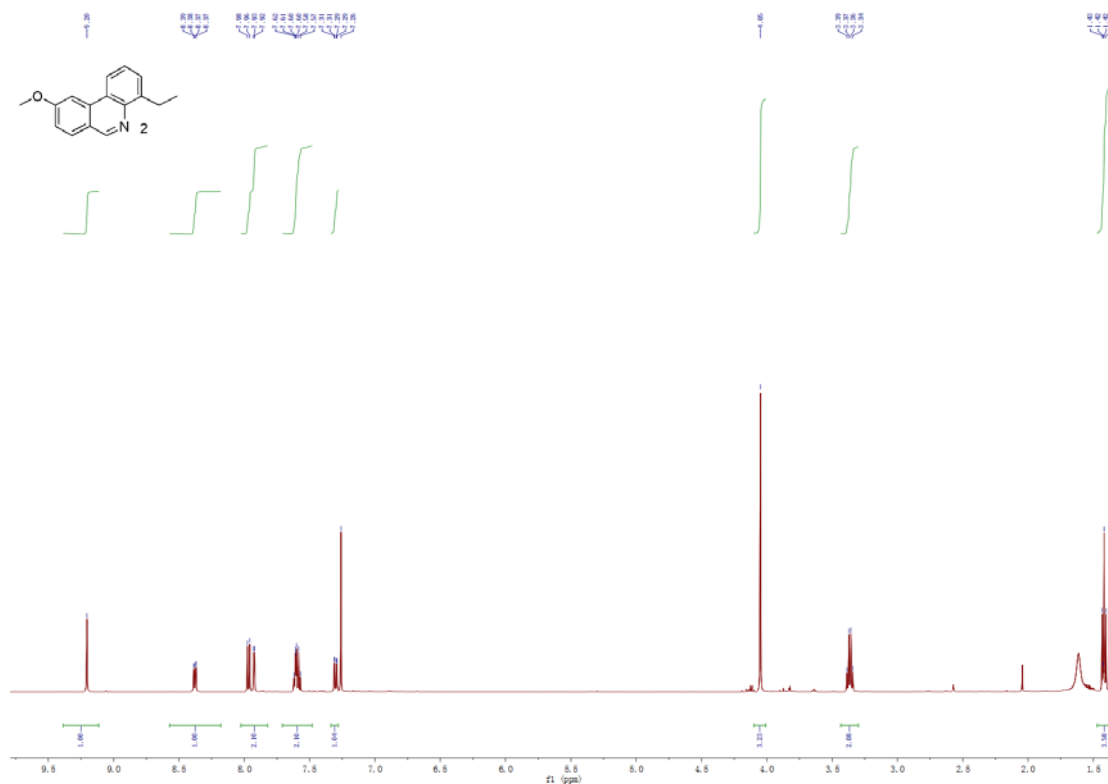

$^1\text{H}$  NMR (500 MHz) spectrum of compound 2 in  $\text{CDCl}_3$ .

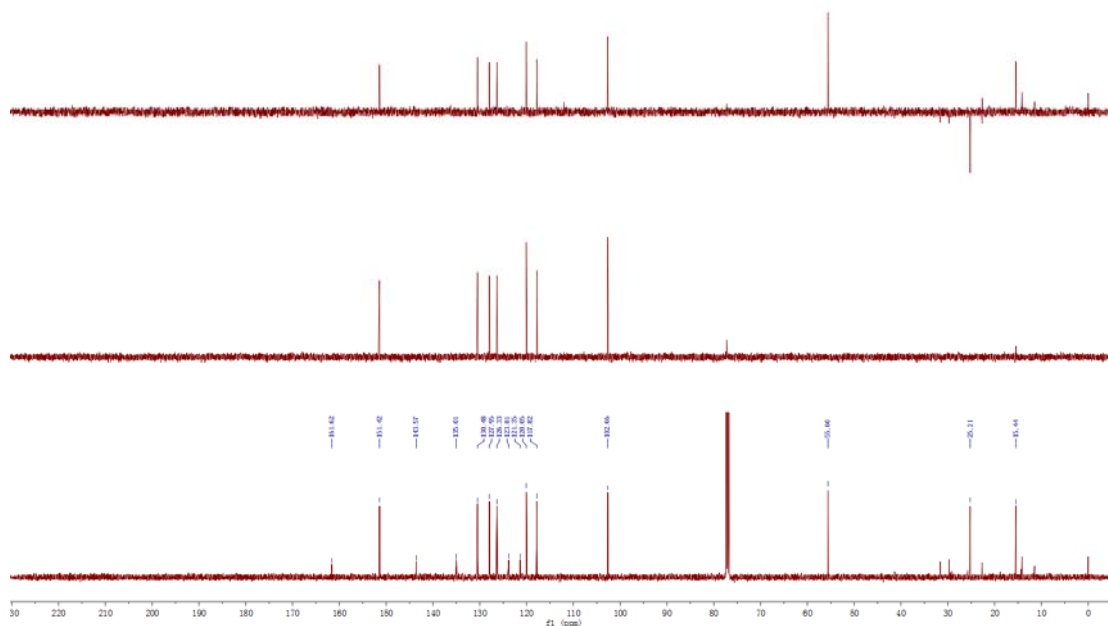

<sup>13</sup>C NMR (125 MHz) spectrum of compound **2** in CDCl<sub>3</sub>.

### User Spectra

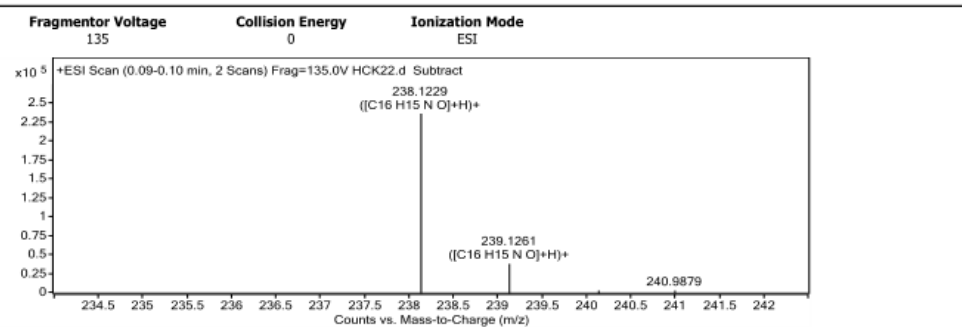

### Peak List

| m/z      | z | Abund     | Formula                             | Ion                |
|----------|---|-----------|-------------------------------------|--------------------|
| 79.0216  | 1 | 533680.38 |                                     |                    |
| 80.0245  | 1 | 14673.11  |                                     |                    |
| 81.0176  | 1 | 18777.86  |                                     |                    |
| 118.5081 | 1 | 6143.02   |                                     |                    |
| 120.5277 | 2 | 5595.79   |                                     |                    |
| 137.0015 | 2 | 5016.08   |                                     |                    |
| 139.0209 | 2 | 5252.92   |                                     |                    |
| 157.0349 | 1 | 5778.03   |                                     |                    |
| 238.1229 | 1 | 236531.34 | C <sub>16</sub> H <sub>15</sub> N O | (M+H) <sup>+</sup> |
| 239.1261 | 1 | 39001.64  | C <sub>16</sub> H <sub>15</sub> N O | (M+H) <sup>+</sup> |

### Formula Calculator Element Limits

| Element | Min | Max |
|---------|-----|-----|
| C       | 3   | 60  |
| H       | 0   | 120 |
| O       | 0   | 30  |
| N       | 0   | 10  |

### Formula Calculator Results

| Formula                             | CalculatedMass | CalculatedMz | Mz       | Diff. (mDa) | Diff. (ppm) | DBE     |
|-------------------------------------|----------------|--------------|----------|-------------|-------------|---------|
| C <sub>16</sub> H <sub>15</sub> N O | 237.1154       | 238.1226     | 238.1229 | -0.30       | -1.26       | 10.0000 |

HRESI (+) MS spectrum of compound **2**.

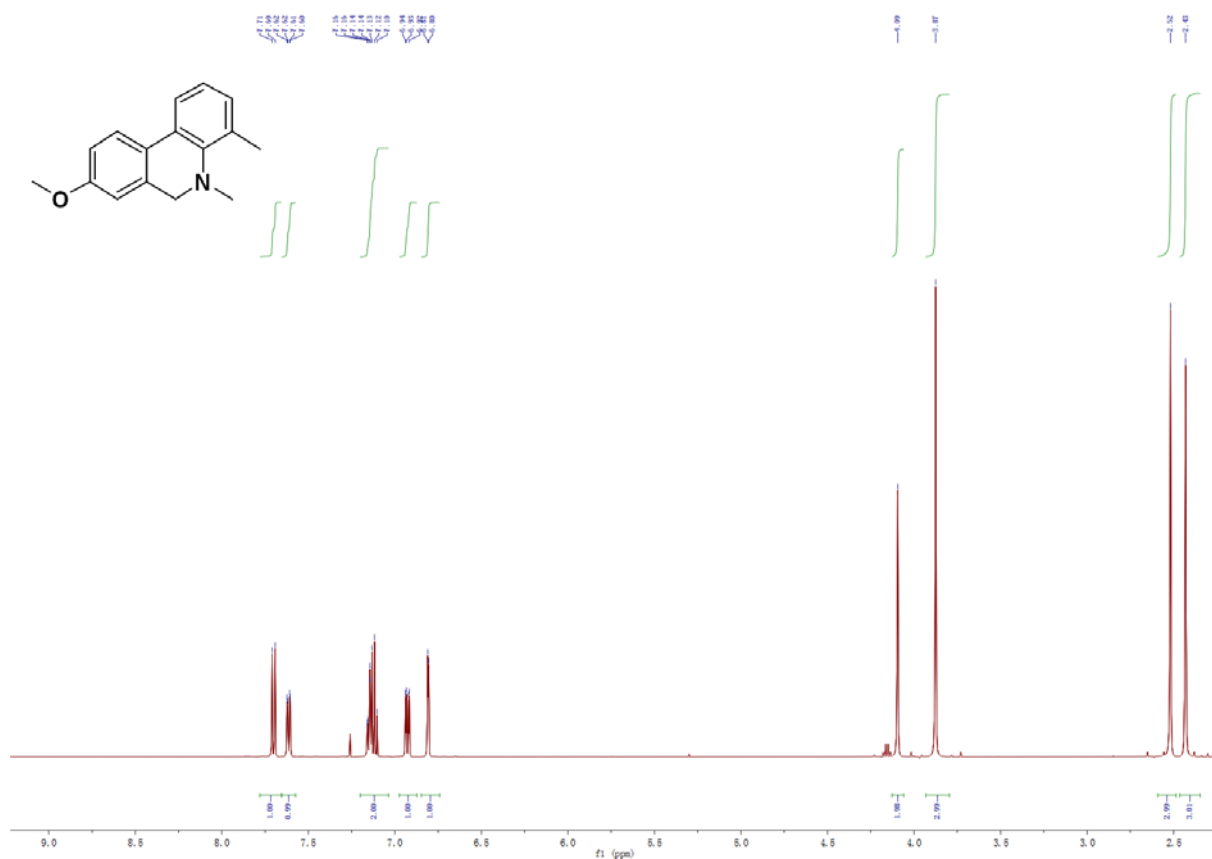

<sup>1</sup>H NMR (500 MHz) spectrum of compound 3 in CDCl<sub>3</sub>.

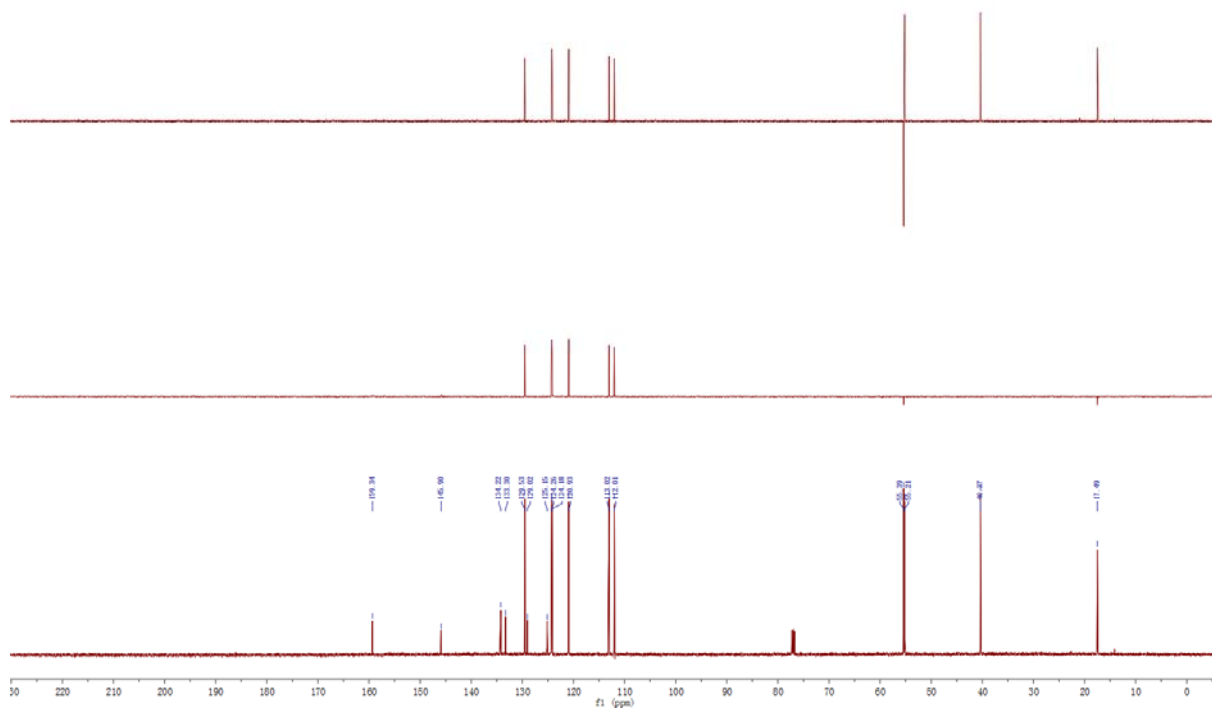

<sup>13</sup>C NMR (125 MHz) spectrum of compound 3 in CDCl<sub>3</sub>.

### User Spectra

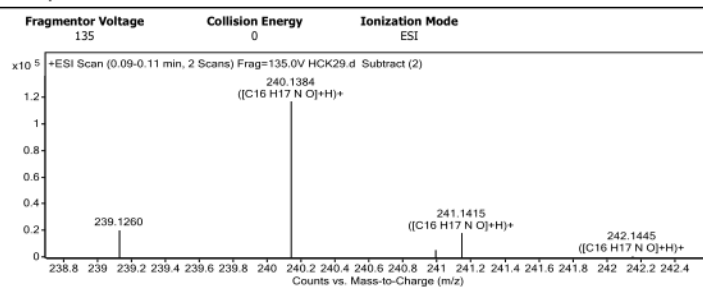

#### Peak List

| m/z      | z | Abund     | Formula     | Ion    |
|----------|---|-----------|-------------|--------|
| 79.0215  | 1 | 548429.56 |             |        |
| 80.0243  | 1 | 13939.46  |             |        |
| 81.0174  | 1 | 22588.8   |             |        |
| 118.508  | 2 | 10863.11  |             |        |
| 137.0018 | 1 | 10705.78  |             |        |
| 238.1227 | 1 | 122233.65 |             |        |
| 239.126  | 1 | 21061.25  |             |        |
| 240.1384 | 1 | 117358.68 | C16 H17 N O | (M+H)+ |
| 241.1415 | 1 | 18467.42  | C16 H17 N O | (M+H)+ |
| 254.1175 | 1 | 13652.38  |             |        |

#### Formula Calculator Element Limits

| Element | Min | Max |
|---------|-----|-----|
| C       | 3   | 60  |
| H       | 0   | 120 |
| O       | 0   | 30  |
| N       | 0   | 3   |

#### Formula Calculator Results

| Formula     | CalculatedMass | CalculatedMz | Mz       | Diff. (mDa) | Diff. (ppm) | DBE    |
|-------------|----------------|--------------|----------|-------------|-------------|--------|
| C16 H17 N O | 239.1310       | 240.1383     | 240.1384 | -0.10       | -0.42       | 9.0000 |

HRESI (+) MS spectrum of compound 3.

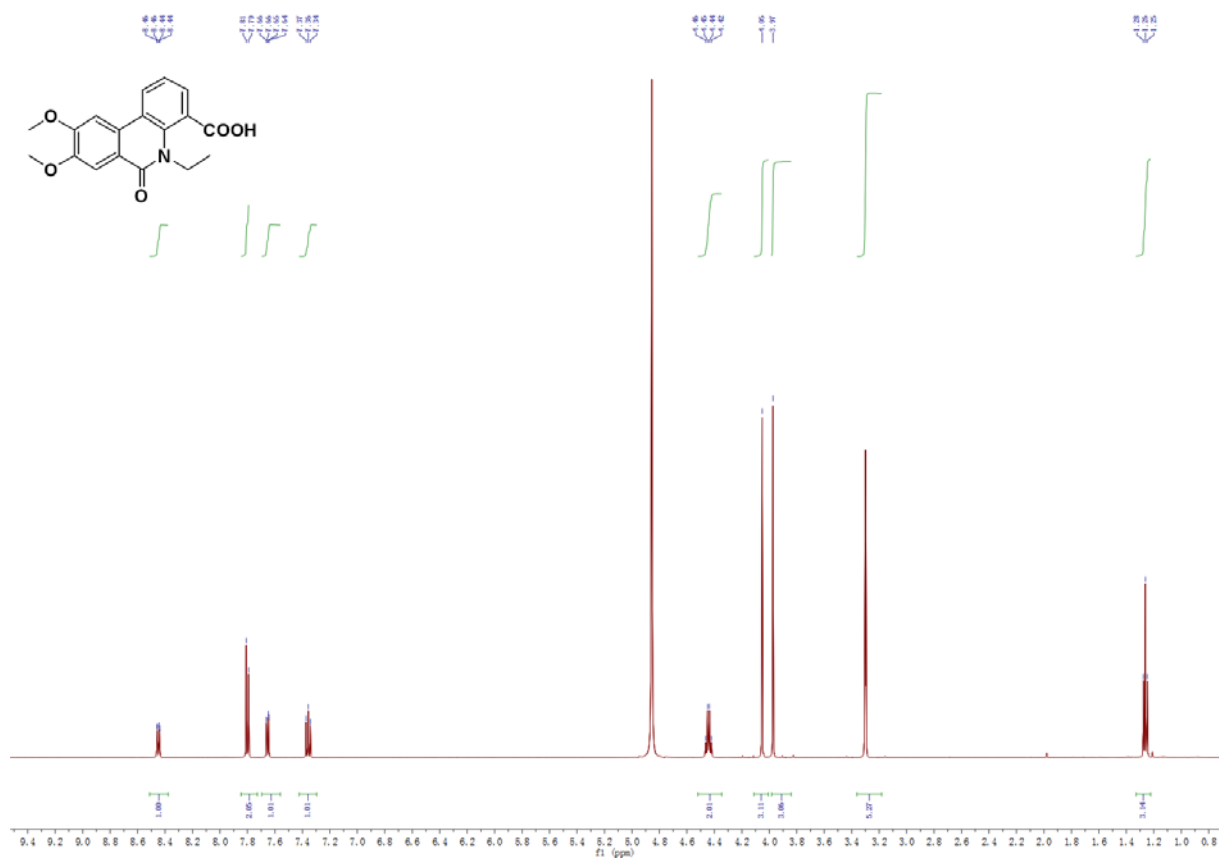

<sup>1</sup>H NMR (500 MHz) spectrum of compound 4 in CD<sub>3</sub>OD.

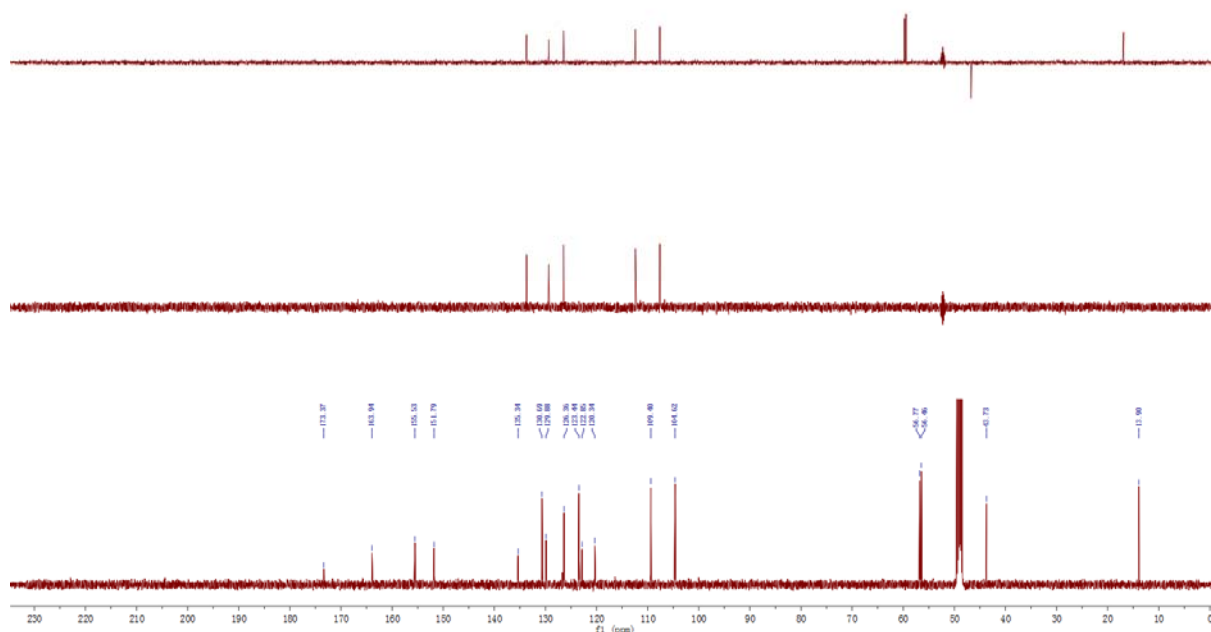

$^{13}\text{C}$  NMR (125 MHz) spectrum of compound **4** in  $\text{CD}_3\text{OD}$ .

#### User Spectra

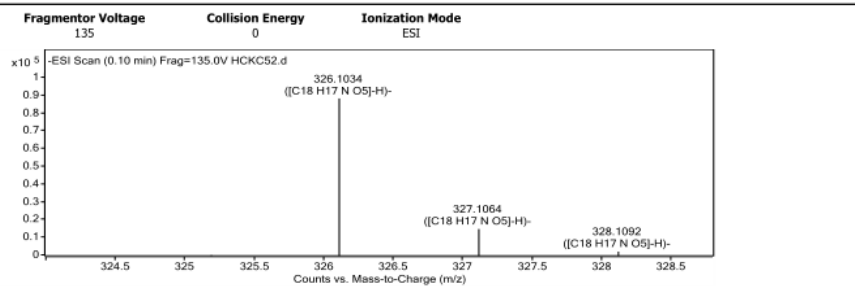

#### Peak List

| $m/z$     | $z$ | Abund     | Formula                                  | Ion                |
|-----------|-----|-----------|------------------------------------------|--------------------|
| 112.9853  | 1   | 22211.83  |                                          |                    |
| 254.0822  | 1   | 254755.22 |                                          |                    |
| 255.0855  | 1   | 44261.14  |                                          |                    |
| 282.1135  | 1   | 86115.33  |                                          |                    |
| 326.1034  | 1   | 88347.26  | $\text{C}_{18}\text{H}_{17}\text{N O}_5$ | (M-H) <sup>-</sup> |
| 675.1967  | 1   | 21782.32  |                                          |                    |
| 966.001   | 1   | 84231.08  |                                          |                    |
| 982.9898  | 1   | 28748.19  |                                          |                    |
| 1033.9885 | 1   | 126847.33 |                                          |                    |
| 1034.9907 | 1   | 29190.7   |                                          |                    |

#### Formula Calculator Element Limits

| Element | Min | Max |
|---------|-----|-----|
| C       | 3   | 60  |
| H       | 0   | 120 |
| O       | 0   | 30  |
| N       | 0   | 5   |

#### Formula Calculator Results

| Formula                                  | CalculatedMass | CalculatedMz | Mz       | Diff. (mDa) | Diff. (ppm) | DBE     |
|------------------------------------------|----------------|--------------|----------|-------------|-------------|---------|
| $\text{C}_{18}\text{H}_{17}\text{N O}_5$ | 327.1107       | 326.1034     | 326.1034 | 0.00        | 0.00        | 11.0000 |

HRESI (-) MS spectrum of compound **4**.



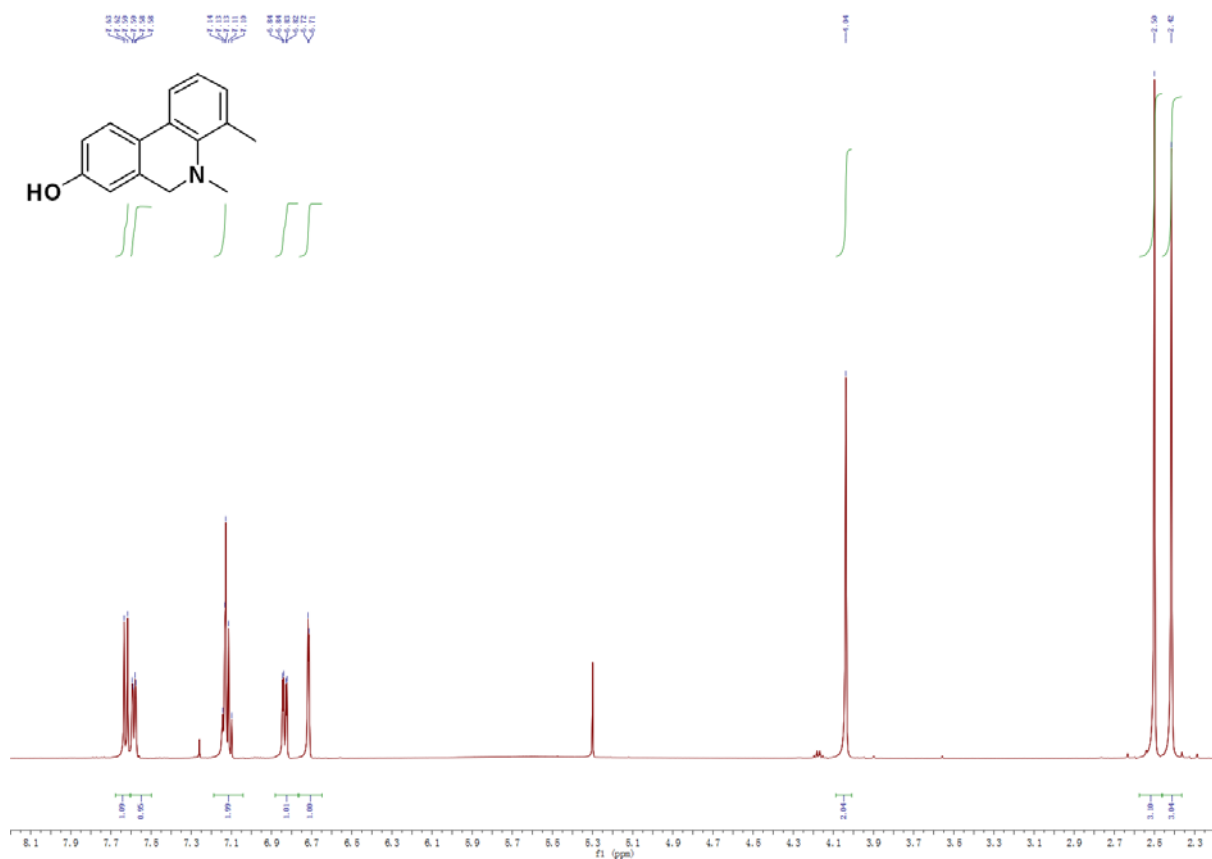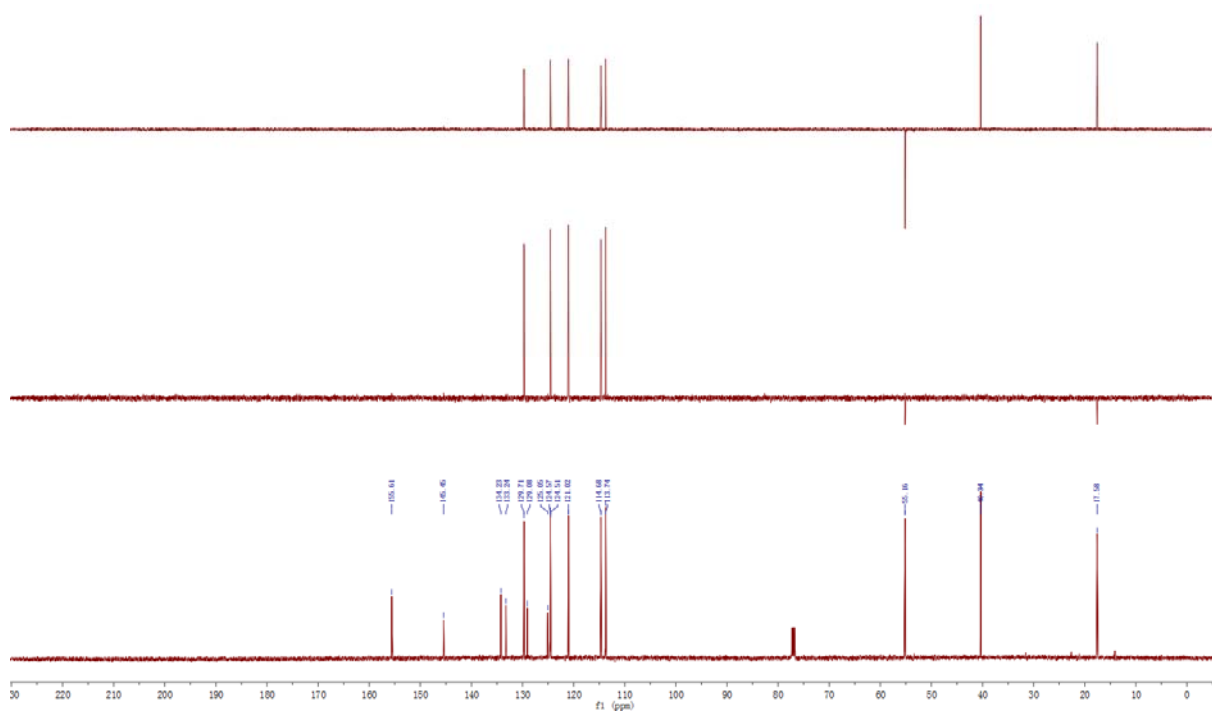

### User Spectra

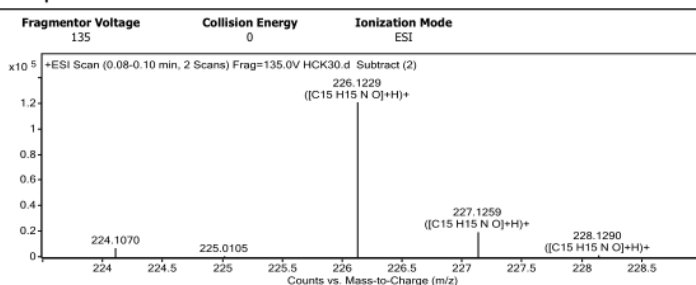

#### Peak List

| m/z      | z | Abund     | Formula     | Ion    |
|----------|---|-----------|-------------|--------|
| 79.0214  | 1 | 224453.22 |             |        |
| 80.0245  | 1 | 5156.44   |             |        |
| 81.0175  | 1 | 7981.73   |             |        |
| 118.5082 | 1 | 3935.15   |             |        |
| 126.4941 | 1 | 4576.37   |             |        |
| 137.0017 | 2 | 5591.59   |             |        |
| 157.0355 |   | 3096.96   |             |        |
| 224.107  | 1 | 7471.71   |             |        |
| 226.1229 | 1 | 121178.08 | C15 H15 N O | (M+H)+ |
| 227.1259 | 1 | 20205.18  | C15 H15 N O | (M+H)+ |

#### Formula Calculator Element Limits

| Element | Min | Max |
|---------|-----|-----|
| C       | 3   | 60  |
| H       | 0   | 120 |
| O       | 0   | 30  |
| N       | 0   | 3   |

#### Formula Calculator Results

| Formula     | CalculatedMass | CalculatedMz | Mz       | Diff. (mDa) | Diff. (ppm) | DBE    |
|-------------|----------------|--------------|----------|-------------|-------------|--------|
| C15 H15 N O | 225.1154       | 226.1226     | 226.1229 | -0.30       | -1.33       | 9.0000 |

HRESI (+) MS spectrum of compound 5.

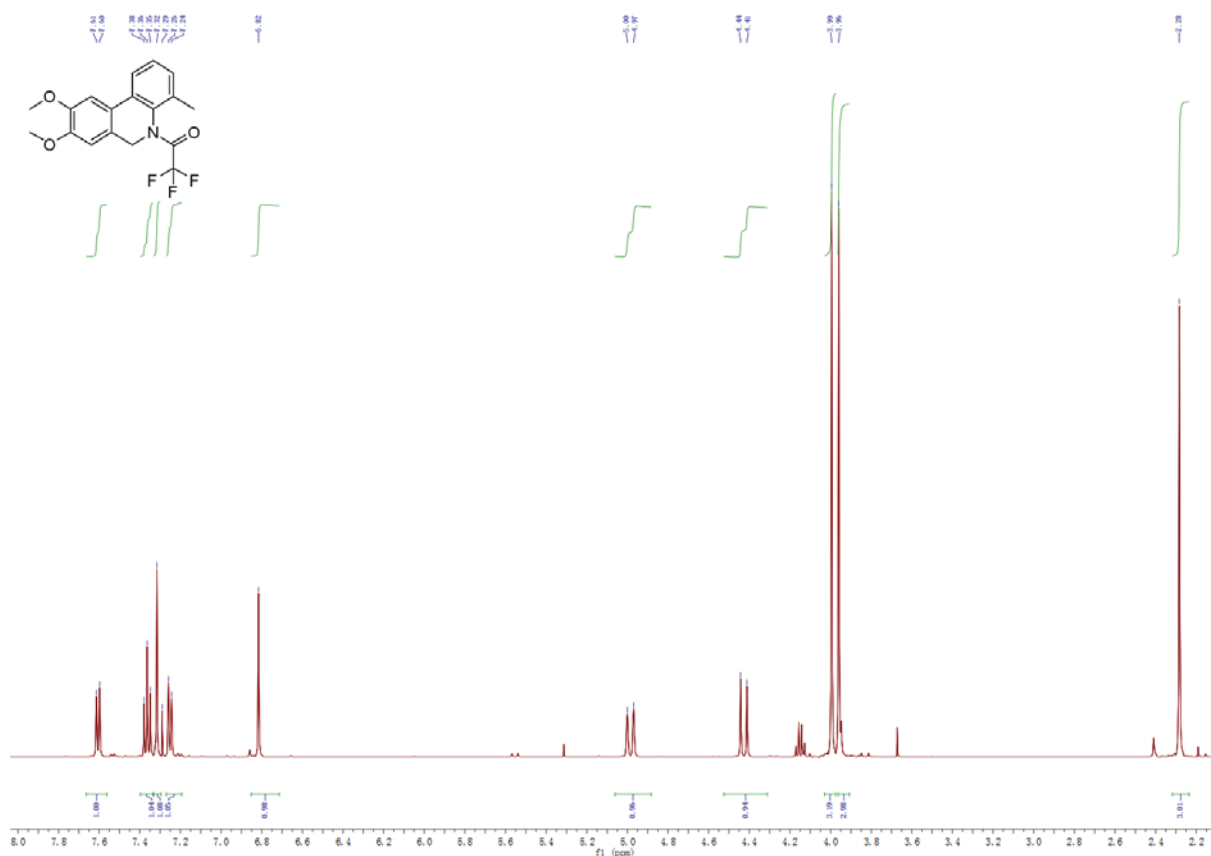

<sup>1</sup>H NMR (500 MHz) spectrum of compound 6 in CDCl<sub>3</sub>

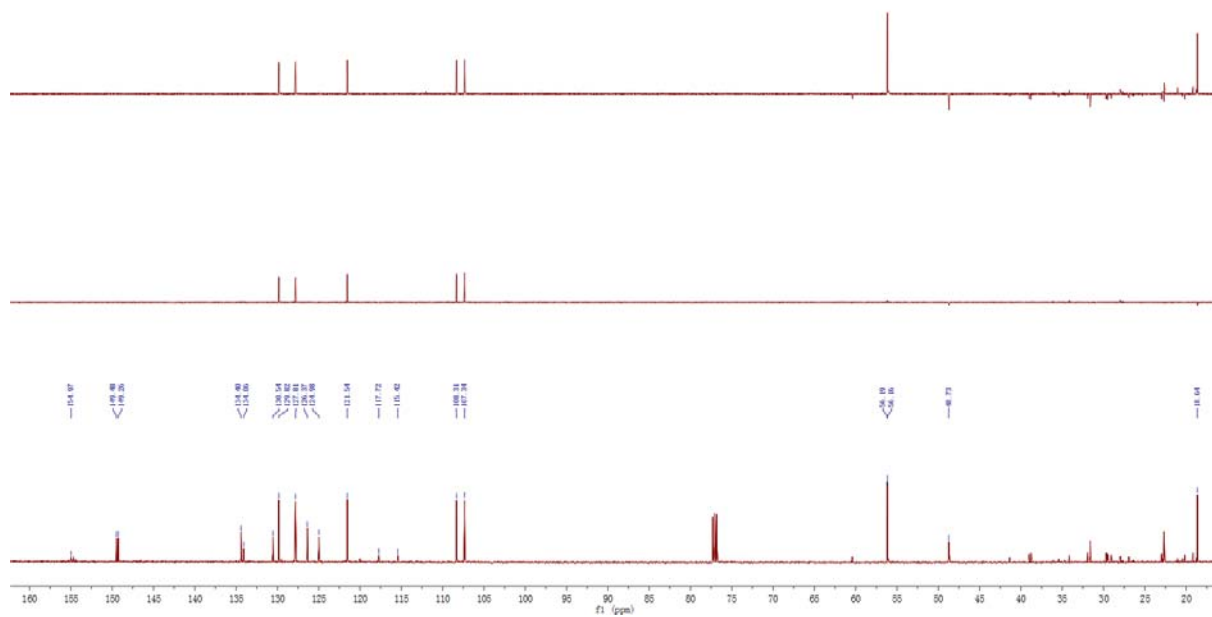

<sup>13</sup>C NMR (125 MHz) spectrum of compound 6 in CDCl<sub>3</sub>.

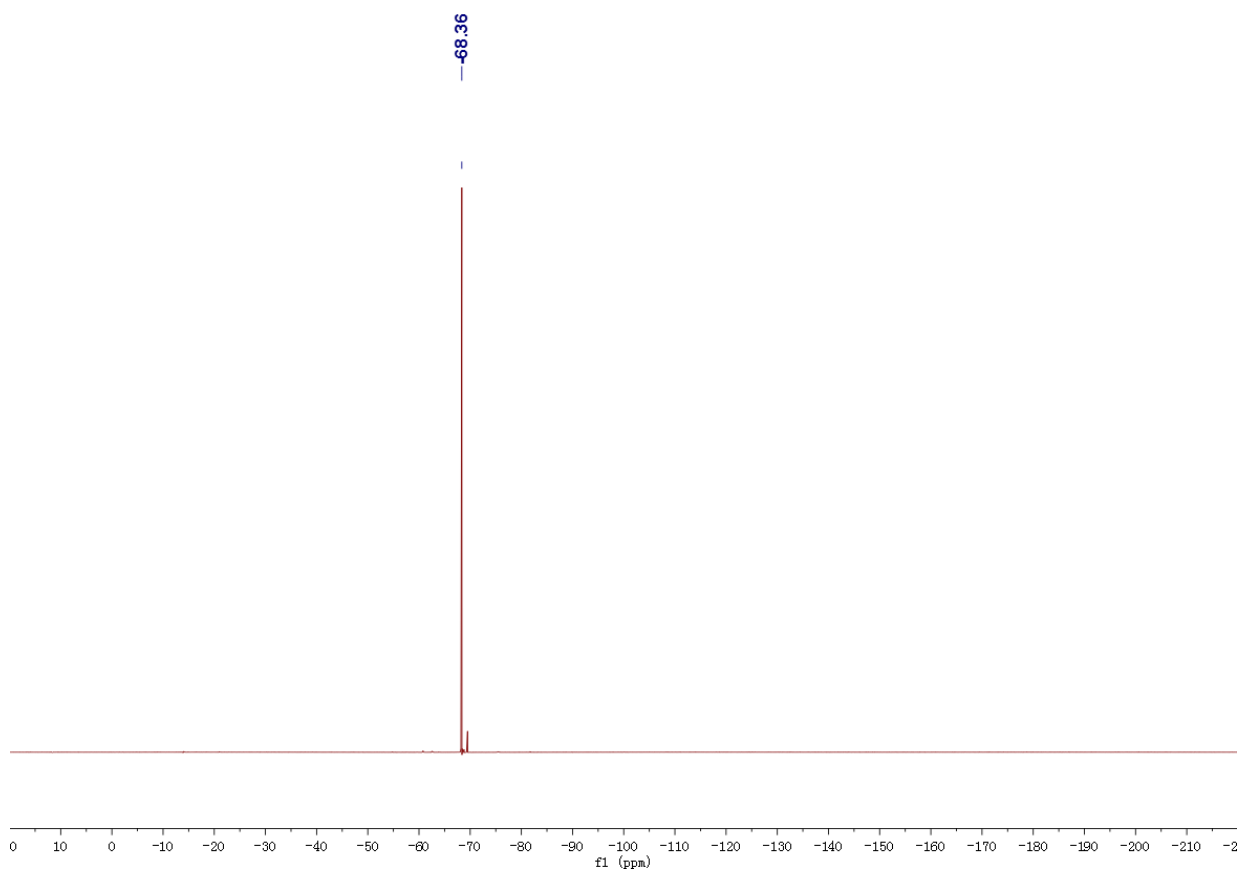

<sup>19</sup>F NMR (125 MHz) spectrum of compound 6 in CDCl<sub>3</sub>.

### User Spectra

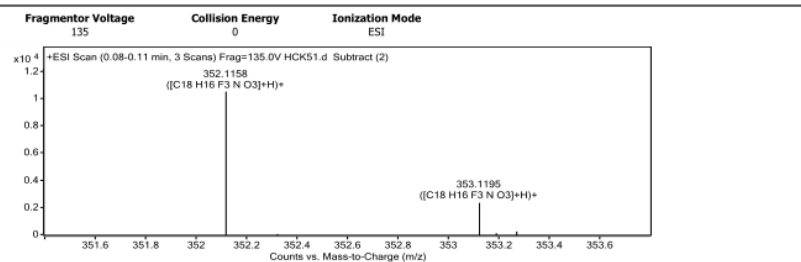

#### Peak List

| m/z      | z | Abund    | Formula         | Ion    |
|----------|---|----------|-----------------|--------|
| 79.0218  | 1 | 360188.5 |                 |        |
| 80.0247  | 1 | 8136.17  |                 |        |
| 81.0174  | 1 | 14089.83 |                 |        |
| 157.0356 |   | 9547.31  |                 |        |
| 254.1181 | 1 | 12994.93 |                 |        |
| 274.2748 | 1 | 15350.48 |                 |        |
| 318.3012 | 1 | 9771.69  |                 |        |
| 351.1081 |   | 8455.11  |                 |        |
| 352.1158 | 1 | 10545.38 | C18 H16 F3 N O3 | (M+H)+ |
| 415.2122 | 1 | 7677.89  |                 |        |
| 449.1044 | 2 | 8340.18  |                 |        |
| 453.1681 | 1 | 7983.59  |                 |        |
| 474.2607 | 1 | 8300.38  |                 |        |

#### Formula Calculator Element Limits

| Element | Min | Max |
|---------|-----|-----|
| C       | 3   | 60  |
| H       | 0   | 120 |
| O       | 0   | 30  |
| N       | 0   | 5   |
| F       | 0   | 5   |

#### Formula Calculator Results

| Formula         | CalculatedMass | CalculatedMz | Mz       | Diff. (mDa) | Diff. (ppm) | DBE     |
|-----------------|----------------|--------------|----------|-------------|-------------|---------|
| C18 H16 F3 N O3 | 351.1082       | 352.1155     | 352.1158 | -0.30       | -0.85       | 10.0000 |

HRESI (+) MS spectrum of compound 6.

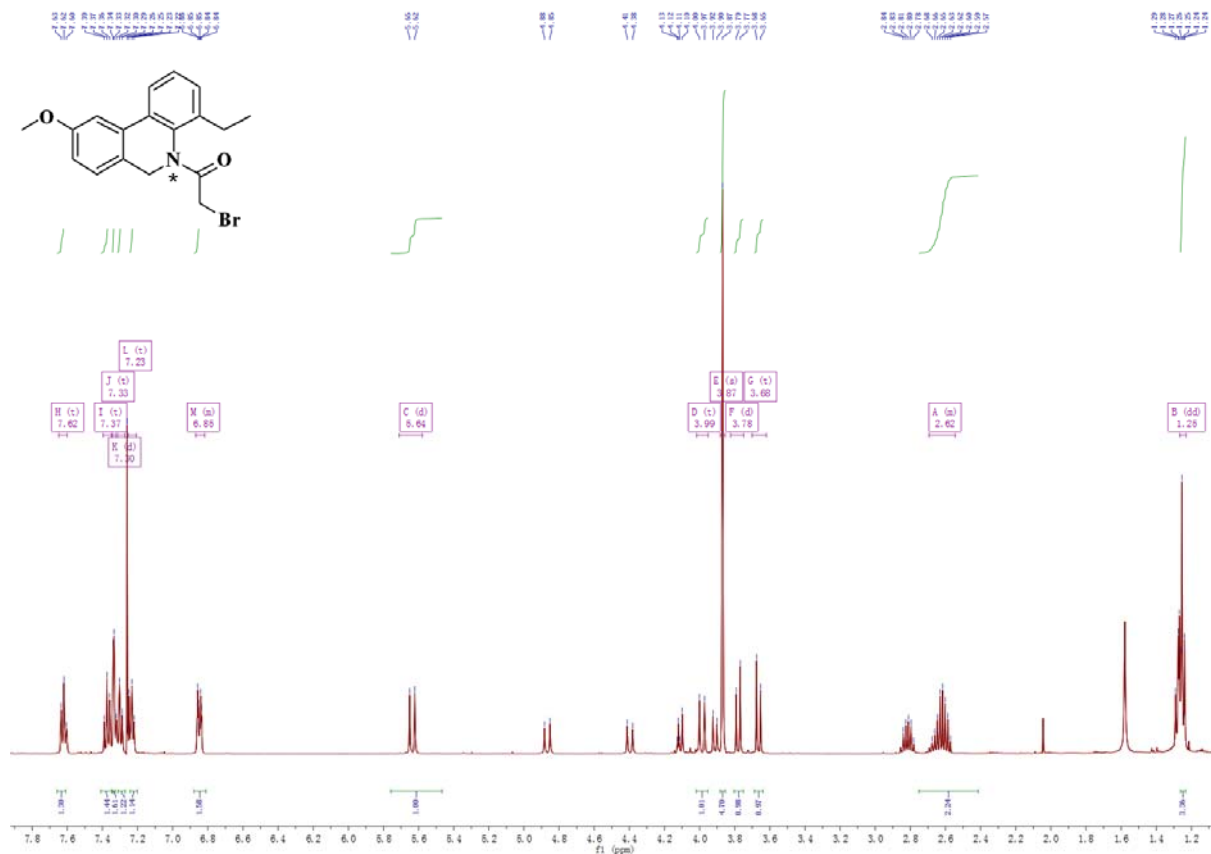

<sup>1</sup>H NMR (500 MHz) spectrum of compound 7 in CDCl<sub>3</sub>

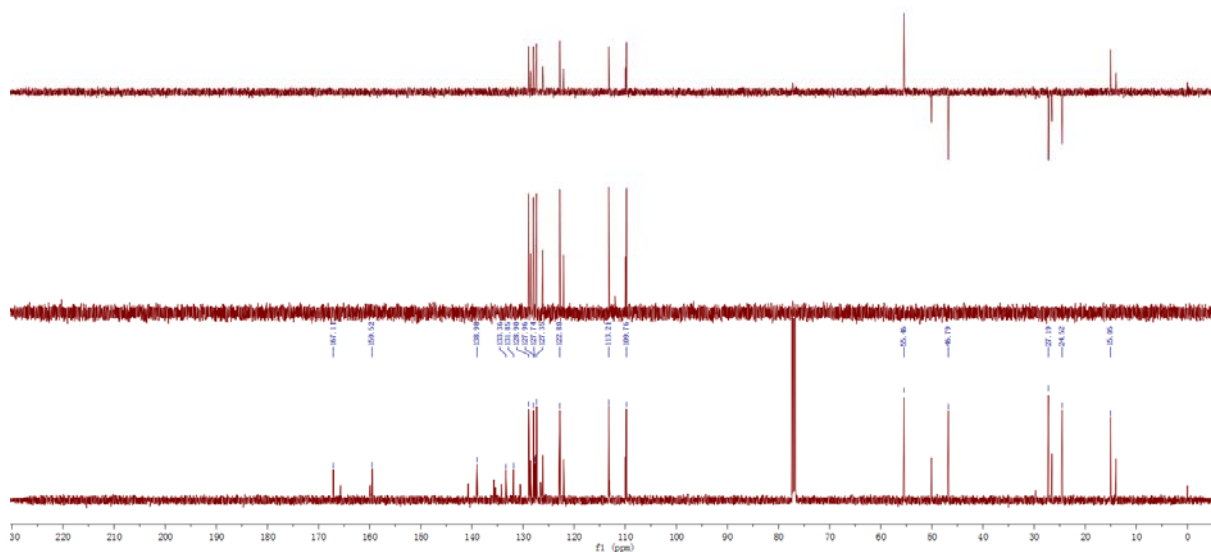

$^{13}\text{C}$  NMR (125 MHz) spectrum of compound **7** in  $\text{CDCl}_3$ .

#### User Spectra

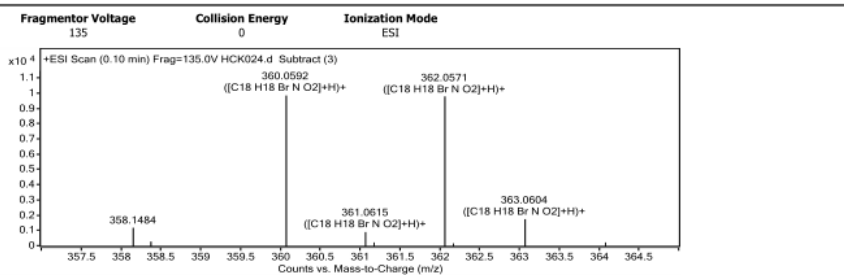

#### Peak List

| $m/z$    | $z$ | Abund     | Formula                                            | Ion                     |
|----------|-----|-----------|----------------------------------------------------|-------------------------|
| 79.0214  | 1   | 773002.75 |                                                    |                         |
| 80.0244  | 1   | 19284.22  |                                                    |                         |
| 81.0173  | 1   | 26284.11  |                                                    |                         |
| 118.5076 | 2   | 12038.94  |                                                    |                         |
| 126.494  | 1   | 11107.31  |                                                    |                         |
| 137.0015 | 2   | 12762.64  |                                                    |                         |
| 157.0345 | 1   | 12000.01  |                                                    |                         |
| 240.9873 |     | 6747.39   |                                                    |                         |
| 360.0592 | 1   | 9907.59   | $\text{C}_{18}\text{H}_{18}\text{BrN}_2\text{O}_2$ | $(\text{M}+\text{H})^+$ |
| 362.0571 | 1   | 9825.67   | $\text{C}_{18}\text{H}_{18}\text{BrN}_2\text{O}_2$ | $(\text{M}+\text{H})^+$ |

#### Formula Calculator Element Limits

| Element | Min | Max |
|---------|-----|-----|
| C       | 3   | 60  |
| H       | 0   | 120 |
| O       | 0   | 30  |
| N       | 0   | 3   |
| Br      | 0   | 3   |

#### Formula Calculator Results

| Formula                                            | CalculatedMass | CalculatedMz | Mz       | Diff. (mDa) | Diff. (ppm) | DBE     |
|----------------------------------------------------|----------------|--------------|----------|-------------|-------------|---------|
| $\text{C}_{18}\text{H}_{18}\text{BrN}_2\text{O}_2$ | 359.0521       | 360.0594     | 360.0592 | 0.20        | 0.56        | 10.0000 |

HRESI (+) MS spectrum of compound **7**.

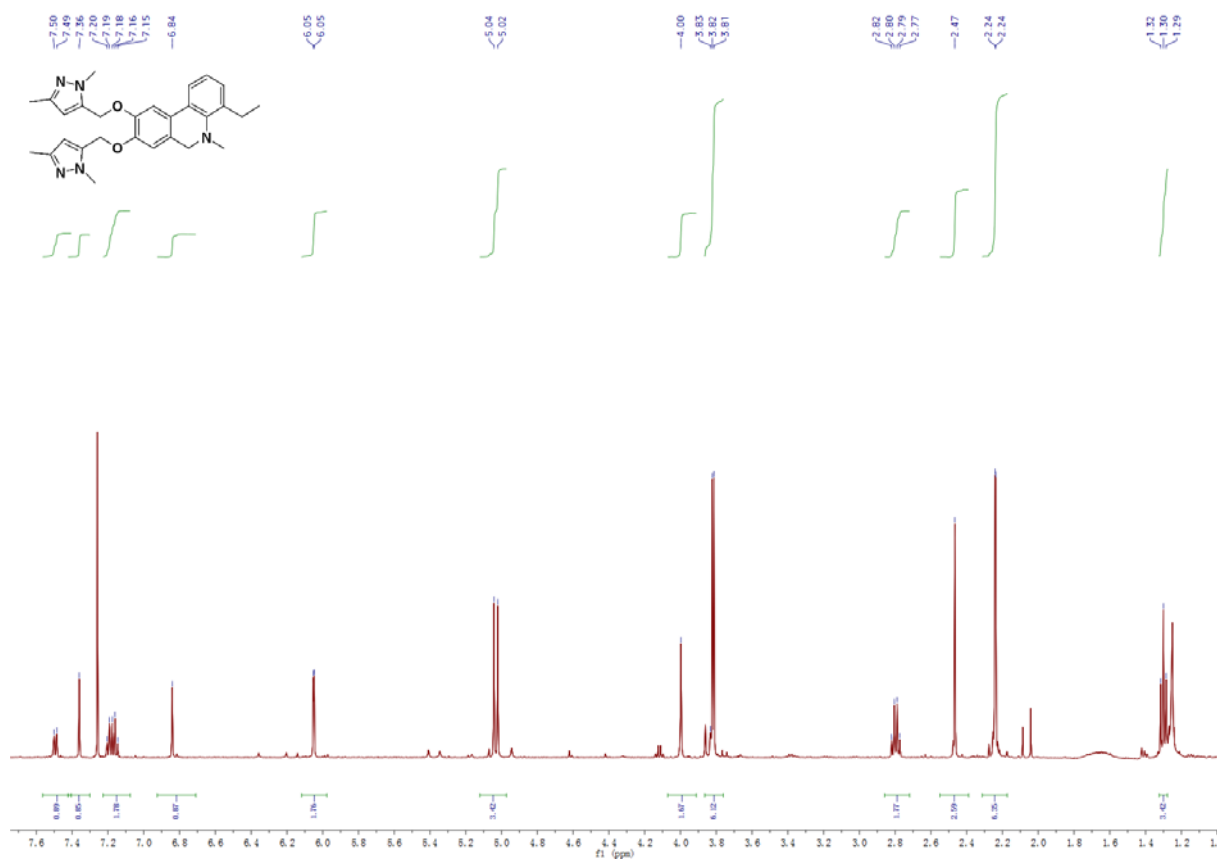

**<sup>1</sup>H NMR (500 MHz) spectrum of compound 8 in CDCl<sub>3</sub>.**

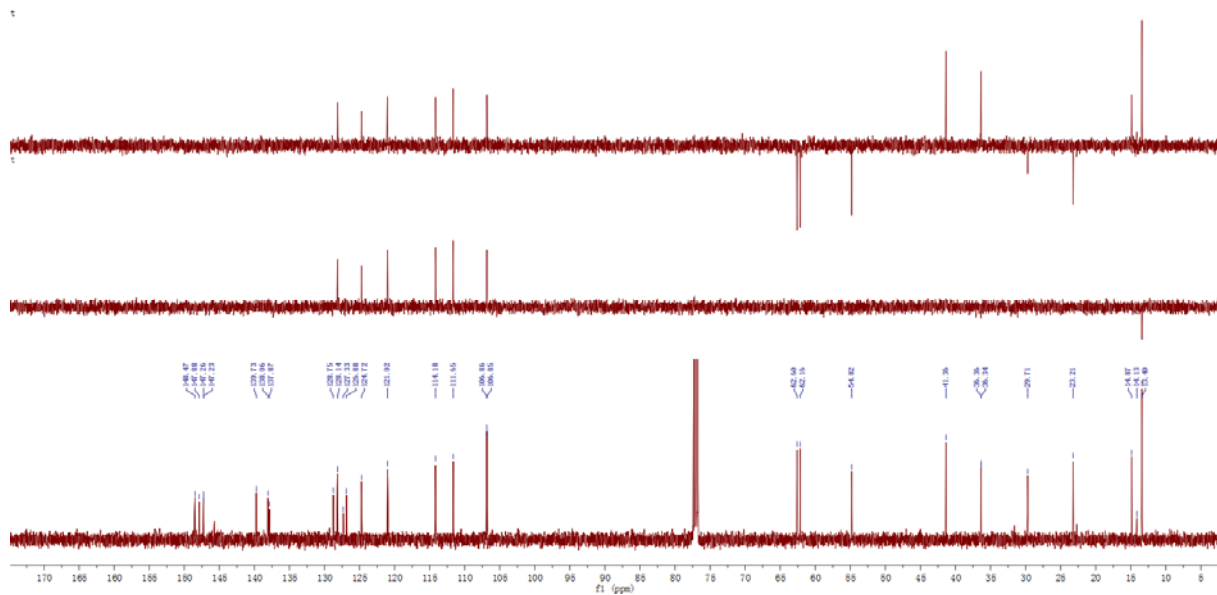

**<sup>13</sup>C NMR (125 MHz) spectrum of compound 8 in CDCl<sub>3</sub>.**

User Spectra

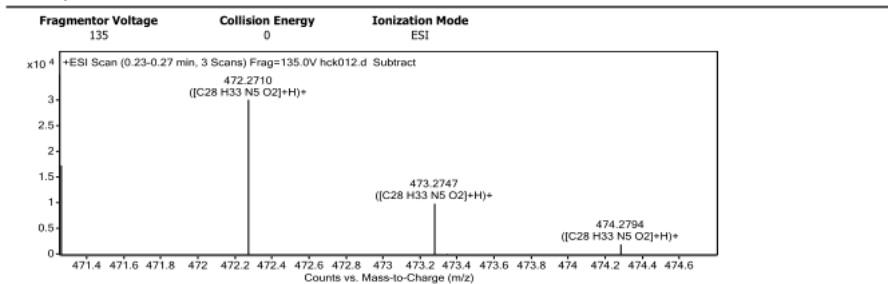

Peak List

| m/z      | z | Abund     | Formula       | Ion    |
|----------|---|-----------|---------------|--------|
| 63.9982  |   | 7257.3    |               |        |
| 79.0217  | 1 | 410113.88 |               |        |
| 80.0245  | 1 | 11367.56  |               |        |
| 81.0174  | 1 | 19100.03  |               |        |
| 97.995   | 2 | 7893.07   |               |        |
| 109.0763 | 1 | 6452.35   |               |        |
| 470.256  | 1 | 55268.95  |               |        |
| 471.2592 | 1 | 17449.04  |               |        |
| 472.271  | 1 | 30112.67  | C28 H33 N5 O2 | (M+H)+ |
| 473.2747 | 1 | 10034.47  | C28 H33 N5 O2 | (M+H)+ |

Formula Calculator Element Limits

| Element | Min | Max |
|---------|-----|-----|
| C       | 3   | 60  |
| H       | 0   | 120 |
| O       | 0   | 30  |
| N       | 0   | 10  |

Formula Calculator Results

| Formula       | CalculatedMass | CalculatedMz | Mz       | Diff. (mDa) | Diff. (ppm) | DBE     |
|---------------|----------------|--------------|----------|-------------|-------------|---------|
| C28 H33 N5 O2 | 471.2634       | 472.2707     | 472.2710 | -0.30       | -0.64       | 15.0000 |

HRESI (+) MS spectrum of compound **8**.

数据文件: C:\CHEM32\1\DATA\BIAOPIN\TEST 2021-09-18 15-15-06\20210826000001.D  
 样品名称: 5057

```

=====
操作者       : D-YI                      序列行 : 1
仪器         : 仪器 1                    位置   : 样品瓶 1
进样日期     : 2021-9-18 15:16:09       进样次数 : 1
                                           进样量 : 2.0 µl

采集方法     : C:\CHEM32\1\DATA\BIAOPIN\TEST 2021-09-18 15-15-06\YBJ_LC.M
最后修改     : 2021-9-18 13:24:58 : D-YI
分析方法     : C:\CHEM32\1\DATA\TEST.M
最后修改     : 2021-9-18 15:02:17 : D-YI
                                           (调用后修改)
  
```

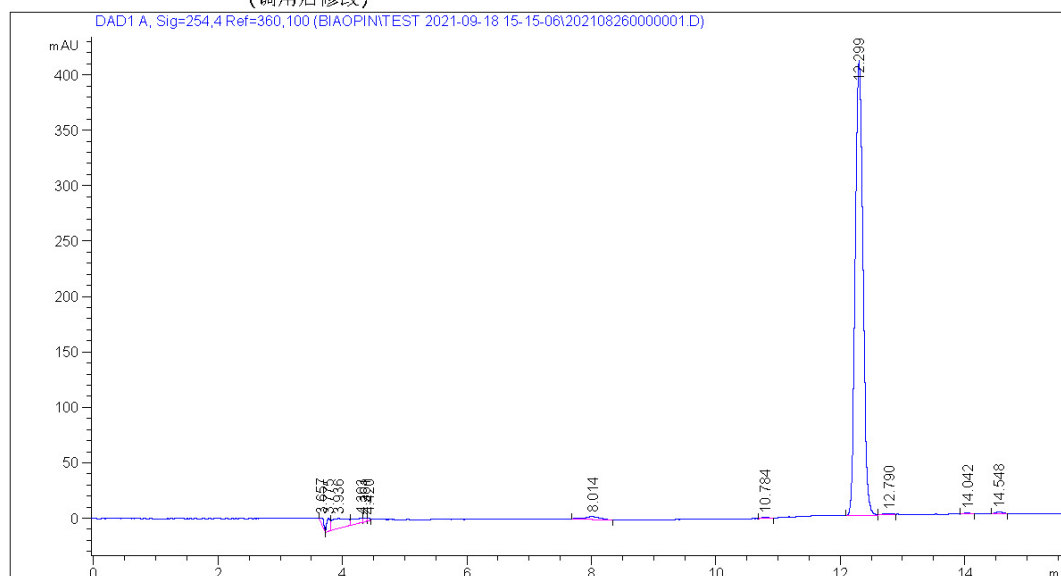

面积百分比报告

```

=====
排序           :      信号
乘积因子:      :      1.0000
稀释因子:      :      1.0000
内标使用乘积因子和稀释因子
  
```

信号 1: DAD1 A, Sig=254,4 Ref=360,100

| 峰 # | 保留时间 [min] | 类型 | 峰宽 [min] | 峰面积 [mAU*s] | 峰高 [mAU] | 峰面积 %  |
|-----|------------|----|----------|-------------|----------|--------|
| 1   | 3.657      | BB | 0.0685   | 22.95609    | 5.10037  | 0.5832 |
| 2   | 3.775      | BV | 0.0621   | 47.55928    | 11.53565 | 1.2082 |
| 3   | 3.936      | VV | 0.2023   | 151.65434   | 9.10396  | 3.8527 |
| 4   | 4.303      | VV | 0.1746   | 55.99206    | 4.01626  | 1.4224 |
| 5   | 4.361      | VV | 0.0556   | 13.05810    | 3.20206  | 0.3317 |
| 6   | 4.420      | VV | 0.0493   | 6.21444     | 2.09939  | 0.1579 |
| 7   | 8.014      | VV | 0.2338   | 53.40079    | 2.71066  | 1.3566 |
| 8   | 10.784     | BB | 0.0937   | 8.22669     | 1.07043  | 0.2090 |

仪器 1 2021-9-18 15:35:09 D-YI

页 1/2



数据文件: C:\CHEM32\1\DATA\BIAOPIN\TEST 2021-09-18 15-15-06\20210826000001.D  
样品名称: 5057

| 峰 # | 保留时间 [min] | 类型 | 峰宽 [min] | 峰面积 [mAU*s] | 峰高 [mAU]  | 峰面积 %   |
|-----|------------|----|----------|-------------|-----------|---------|
| 9   | 12.299     | BV | 0.1367   | 3540.21826  | 410.13559 | 89.9368 |
| 10  | 12.790     | VV | 0.1580   | 15.62767    | 1.19942   | 0.3970  |
| 11  | 14.042     | BV | 0.0918   | 7.88112     | 1.18146   | 0.2002  |
| 12  | 14.548     | BB | 0.1166   | 13.55042    | 1.91488   | 0.3442  |

总量 : 3936.33925 453.27014

=====  
峰加和报告  
=====

信号 1: DAD1 A, Sig=254,4 Ref=360,100  
=====

最终峰加和报告  
=====

信号 1: DAD1 A, Sig=254,4 Ref=360,100  
\*\*\* 报告结束 \*\*\*

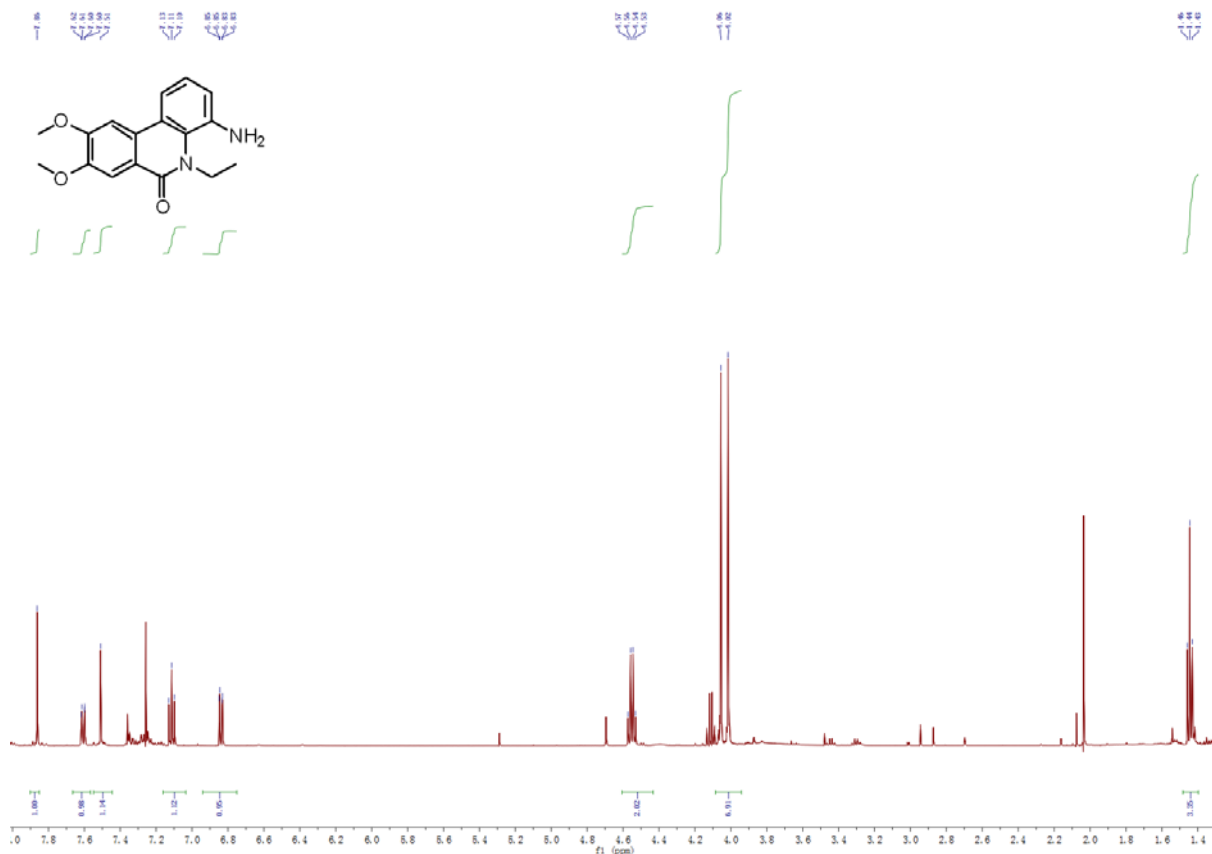

$^1\text{H}$  NMR (500 MHz) spectrum of compound **9** in  $\text{CDCl}_3$ .

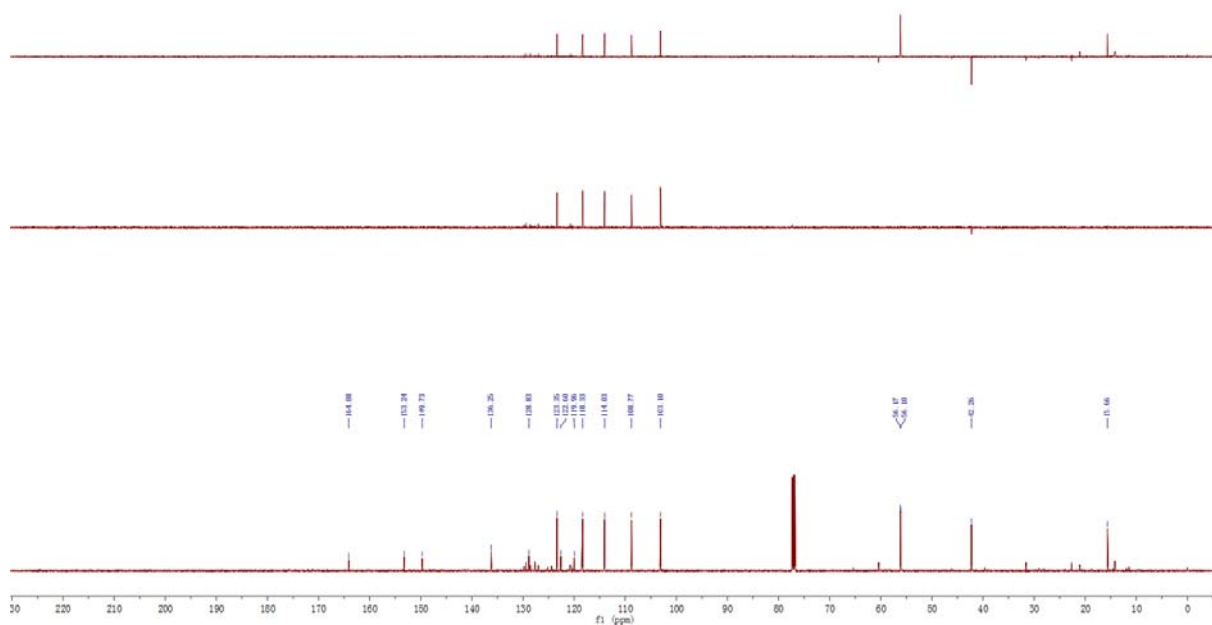

$^{13}\text{C}$  NMR (125 MHz) spectrum of compound **9** in  $\text{CDCl}_3$ .

### User Spectra

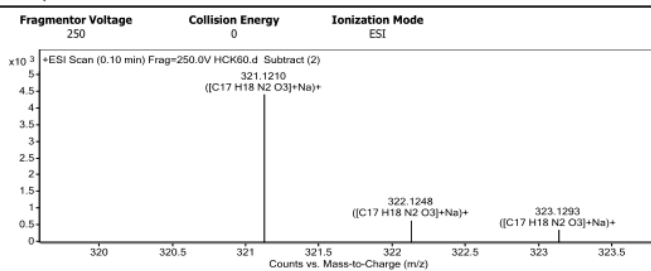

#### Peak List

| m/z      | z | Abund    | Formula       | Ion     |
|----------|---|----------|---------------|---------|
| 225.0658 |   | 4932.8   |               |         |
| 226.0736 |   | 3908.91  |               |         |
| 227.0812 | 1 | 10012.33 |               |         |
| 255.0767 | 1 | 11088.55 |               |         |
| 256.0827 | 1 | 3001.08  |               |         |
| 270.1    |   | 21964.9  |               |         |
| 271.1067 | 1 | 12749.53 |               |         |
| 321.121  | 1 | 4429.8   | C17 H18 N2 O3 | (M+Na)+ |
| 355.1185 | 1 | 11577.14 |               |         |
| 908.3127 | 2 | 4567.79  |               |         |
| 908.8137 | 2 | 6762.24  |               |         |
| 909.3156 | 2 | 6663.43  |               |         |
| 909.8164 | 2 | 6250.32  |               |         |

#### Formula Calculator Element Limits

| Element | Min | Max |
|---------|-----|-----|
| C       | 3   | 60  |
| H       | 0   | 120 |
| O       | 0   | 30  |
| N       | 0   | 5   |

#### Formula Calculator Results

| Formula       | CalculatedMass | CalculatedMz | Mz       | Diff. (mDa) | Diff. (ppm) | DBE     |
|---------------|----------------|--------------|----------|-------------|-------------|---------|
| C17 H18 N2 O3 | 298.1317       | 321.1210     | 321.1210 | 0.00        | 0.00        | 10.0000 |

HRESI (+) MS spectrum of compound **9**.

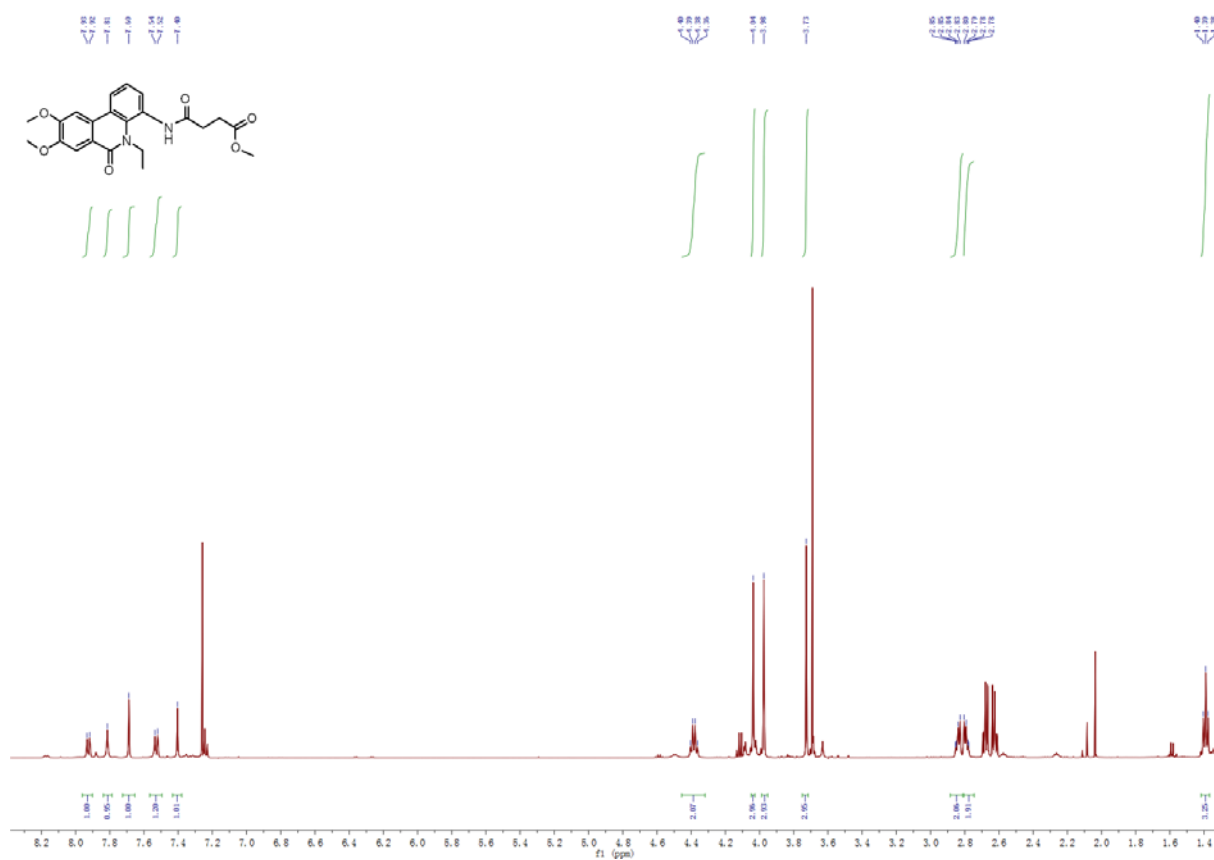

<sup>1</sup>H NMR (500 MHz) spectrum of compound **10** in CDCl<sub>3</sub>.

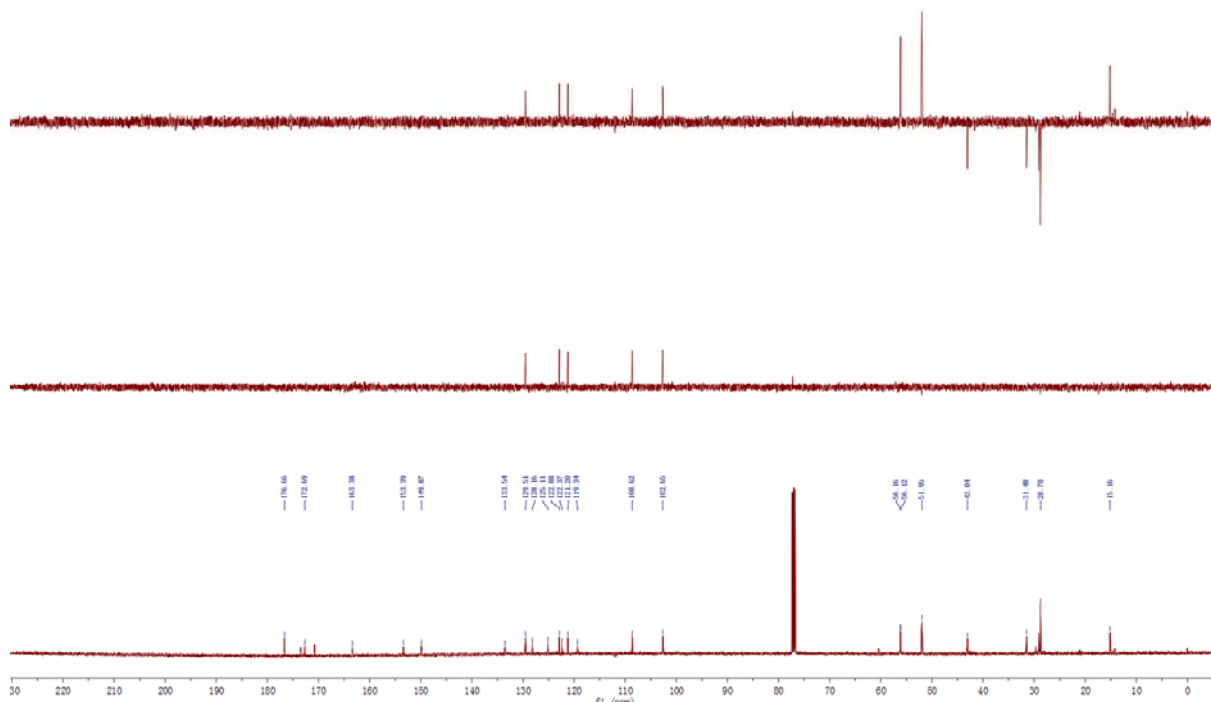

$^{13}\text{C}$  NMR (125 MHz) spectrum of compound **10** in  $\text{CDCl}_3$ .

#### User Spectra

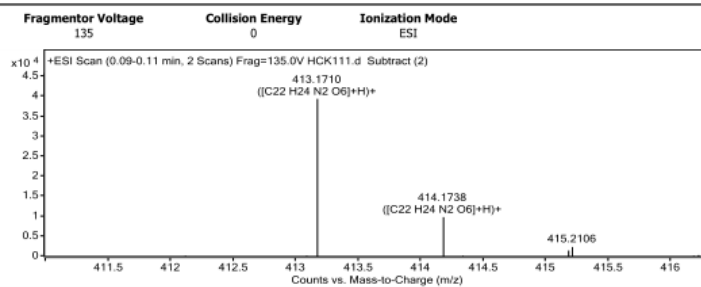

#### Peak List

| $m/z$    | $z$ | Abund     | Formula                                          | Ion                |
|----------|-----|-----------|--------------------------------------------------|--------------------|
| 79.0215  | 1   | 574242.63 |                                                  |                    |
| 80.0243  | 1   | 13763.79  |                                                  |                    |
| 81.0174  | 1   | 22483.95  |                                                  |                    |
| 137.0017 | 1   | 10087.71  |                                                  |                    |
| 157.0349 |     | 10791.06  |                                                  |                    |
| 413.171  | 1   | 39417.8   | $\text{C}_{22}\text{H}_{24}\text{N}_2\text{O}_6$ | (M+H) <sup>+</sup> |
| 414.1738 | 1   | 9856.41   | $\text{C}_{22}\text{H}_{24}\text{N}_2\text{O}_6$ | (M+H) <sup>+</sup> |
| 435.1524 | 1   | 20690.33  |                                                  |                    |
| 451.1267 | 1   | 15604.35  |                                                  |                    |
| 847.3163 | 1   | 15892.33  |                                                  |                    |

#### Formula Calculator Element Limits

| Element | Min | Max |
|---------|-----|-----|
| C       | 3   | 60  |
| H       | 0   | 120 |
| O       | 0   | 30  |
| N       | 0   | 3   |

#### Formula Calculator Results

| Formula                                          | CalculatedMass | CalculatedMz | Mz       | Diff. (mDa) | Diff. (ppm) | DBE     |
|--------------------------------------------------|----------------|--------------|----------|-------------|-------------|---------|
| $\text{C}_{22}\text{H}_{24}\text{N}_2\text{O}_6$ | 412.1634       | 413.1707     | 413.1710 | -0.30       | -0.73       | 12.0000 |

HRESI (+) MS spectrum of compound **10**.

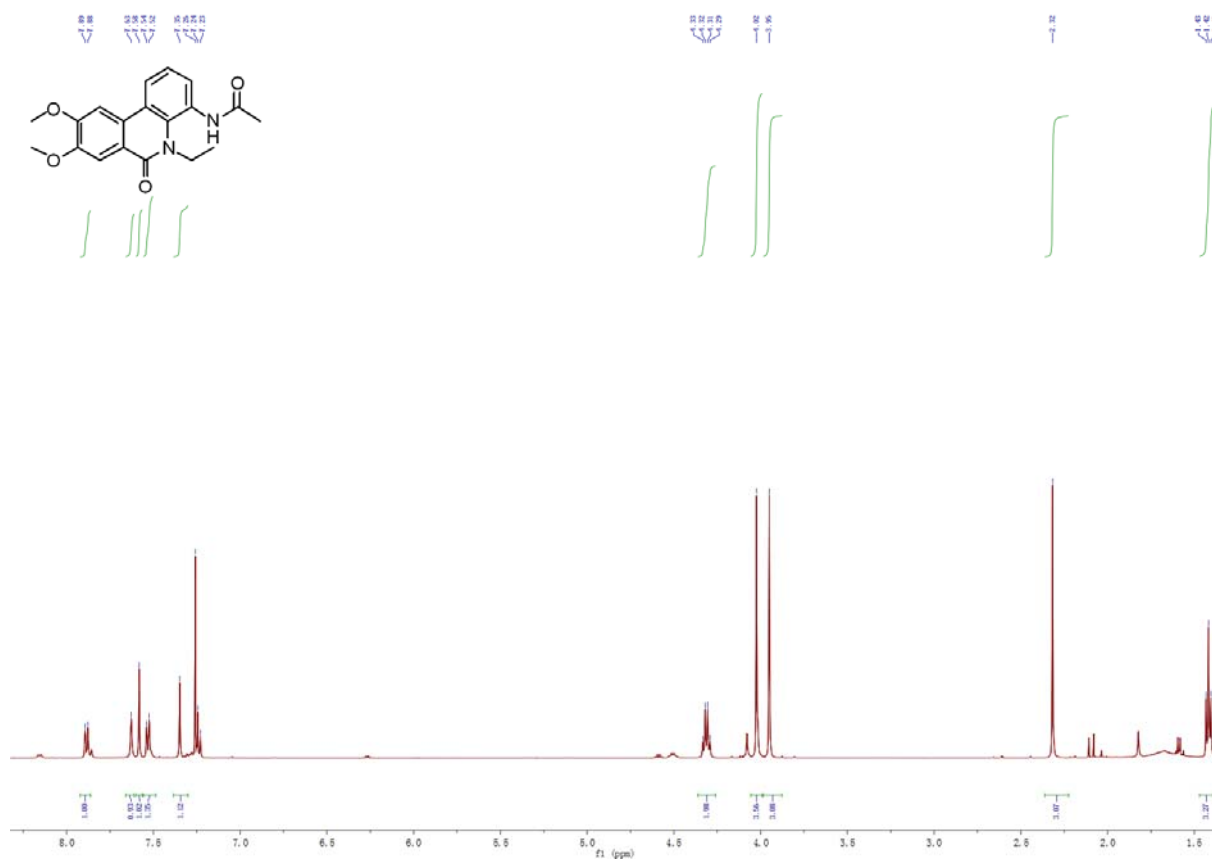

$^1\text{H}$  NMR (500 MHz) spectrum of compound **11** in  $\text{CDCl}_3$ .

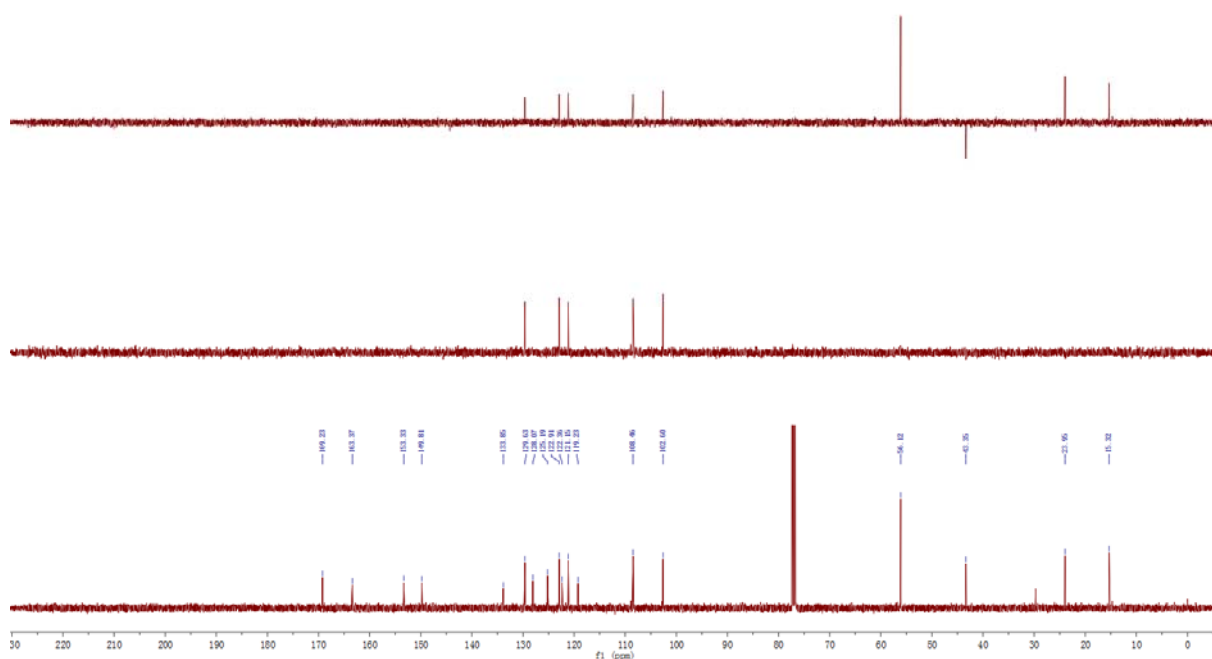

$^{13}\text{C}$  NMR (125 MHz) spectrum of compound **11** in  $\text{CDCl}_3$ .

User Spectra

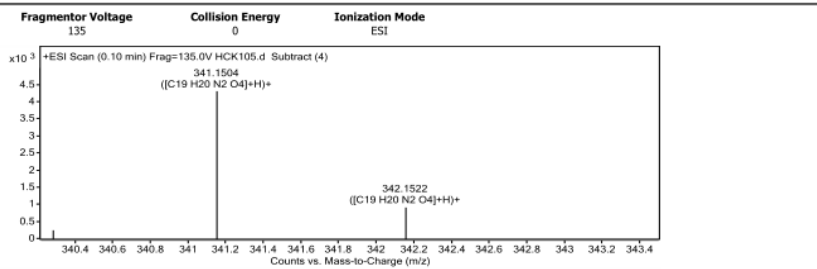

Peak List

| m/z      | z | Abund    | Formula                                                       | Ion                |
|----------|---|----------|---------------------------------------------------------------|--------------------|
| 79.0216  | 1 | 58486.42 |                                                               |                    |
| 80.0246  | 1 | 3081.91  |                                                               |                    |
| 81.0172  |   | 5532.43  |                                                               |                    |
| 118.5085 | 2 | 4106.84  |                                                               |                    |
| 126.495  | 2 | 3322.92  |                                                               |                    |
| 137.0024 | 2 | 8633.03  |                                                               |                    |
| 139.0215 | 2 | 2231.9   |                                                               |                    |
| 144.9866 | 2 | 2020.57  |                                                               |                    |
| 157.0356 | 1 | 5327.9   |                                                               |                    |
| 157.5149 | 1 | 4140.15  |                                                               |                    |
| 341.1504 | 1 | 4331.65  | C <sub>19</sub> H <sub>20</sub> N <sub>2</sub> O <sub>4</sub> | (M+H) <sup>+</sup> |
| 437.1942 | 1 | 2221.47  |                                                               |                    |
| 453.1701 | 1 | 2923.89  |                                                               |                    |

Formula Calculator Element Limits

| Element | Min | Max |
|---------|-----|-----|
| C       | 3   | 60  |
| H       | 0   | 120 |
| O       | 0   | 30  |
| N       | 0   | 5   |

Formula Calculator Results

| Formula                                                       | CalculatedMass | CalculatedMz | Mz       | Diff. (mDa) | Diff. (ppm) | DBE     |
|---------------------------------------------------------------|----------------|--------------|----------|-------------|-------------|---------|
| C <sub>19</sub> H <sub>20</sub> N <sub>2</sub> O <sub>4</sub> | 340.1423       | 341.1496     | 341.1504 | -0.80       | -2.35       | 11.0000 |

HRESI (+) MS spectrum of compound **11**.

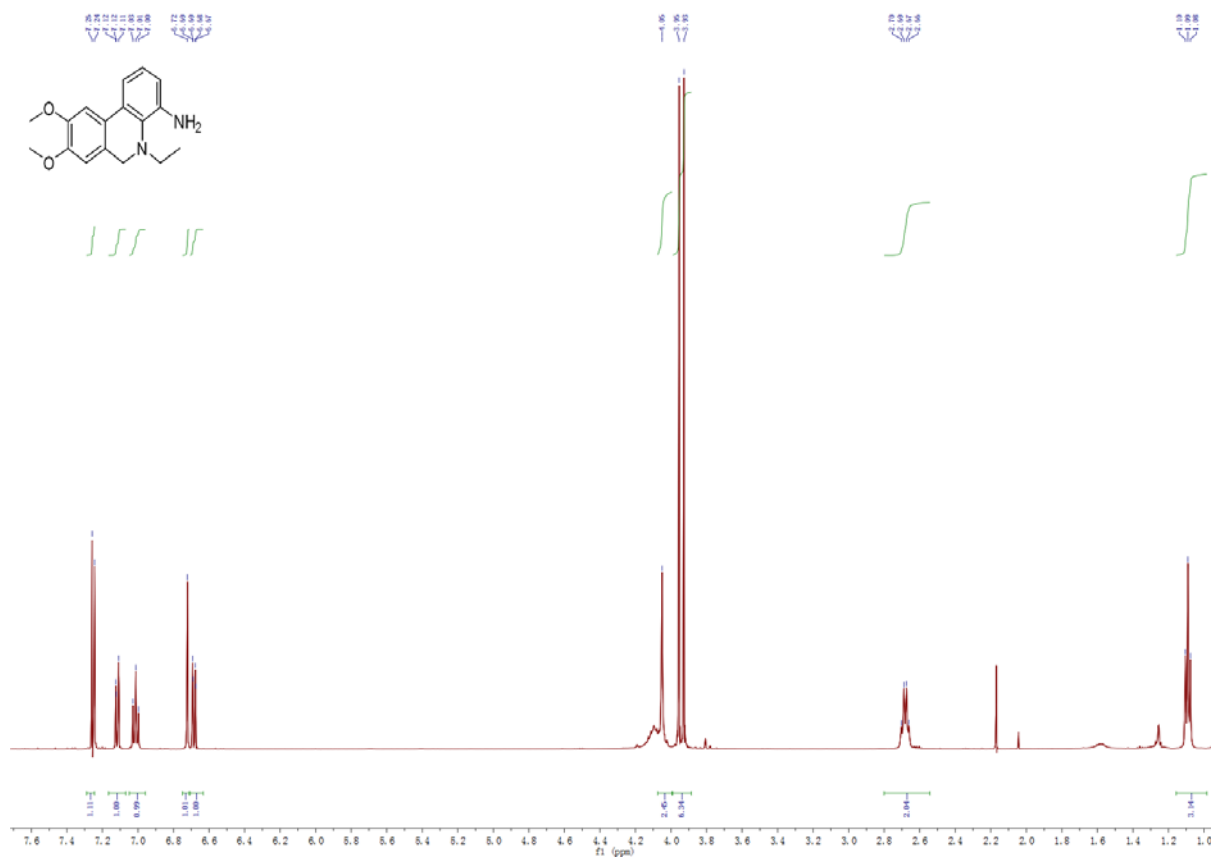

<sup>1</sup>H NMR (500 MHz) spectrum of compound **12** in CDCl<sub>3</sub>.

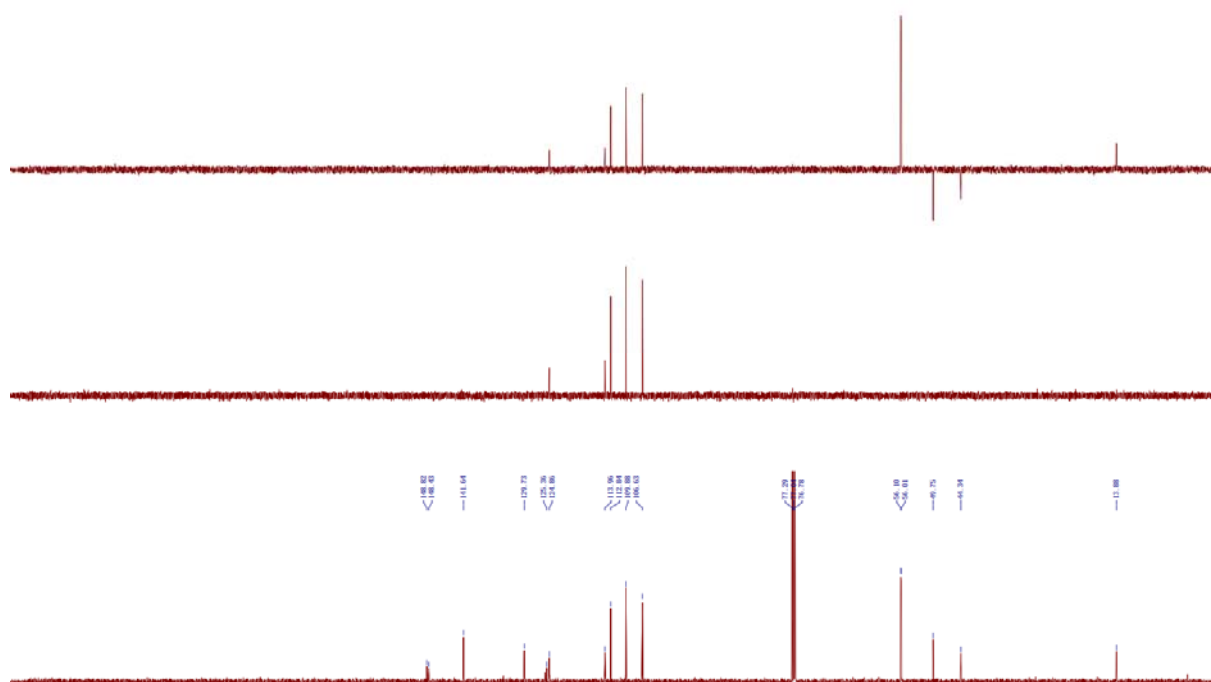

$^{13}\text{C}$  NMR (125 MHz) spectrum of compound **12** in  $\text{CDCl}_3$ .

#### User Spectra

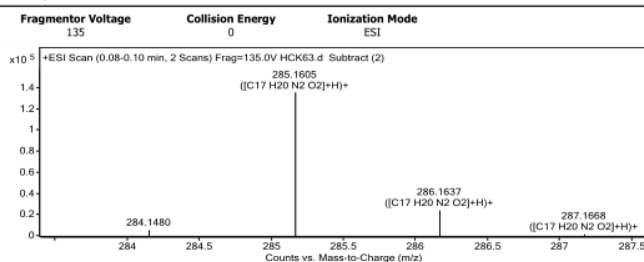

#### Peak List

| m/z      | z | Abund     | Formula       | Ion                |
|----------|---|-----------|---------------|--------------------|
| 79.0217  | 1 | 92969.3   |               |                    |
| 80.0244  | 1 | 4093.57   |               |                    |
| 81.0173  | 1 | 6523.44   |               |                    |
| 126.4947 |   | 2456.28   |               |                    |
| 137.0022 | 2 | 1391.71   |               |                    |
| 139.0207 | 2 | 1802.08   |               |                    |
| 157.0353 |   | 2099.78   |               |                    |
| 283.1445 | 1 | 33563.22  |               |                    |
| 284.148  | 1 | 6490.26   |               |                    |
| 285.1605 | 1 | 135977.28 | C17 H20 N2 O2 | (M+H) <sup>+</sup> |
| 286.1637 | 1 | 25069.22  | C17 H20 N2 O2 | (M+H) <sup>+</sup> |
| 287.1668 | 1 | 2461.39   | C17 H20 N2 O2 | (M+H) <sup>+</sup> |
| 343.1656 | 1 | 2293.99   |               |                    |

#### Formula Calculator Element Limits

| Element | Min | Max |
|---------|-----|-----|
| C       | 3   | 60  |
| H       | 0   | 120 |
| O       | 0   | 30  |
| N       | 0   | 5   |

#### Formula Calculator Results

| Formula       | CalculatedMass | CalculatedMz | Mz       | Diff. (mDa) | Diff. (ppm) | DBE    |
|---------------|----------------|--------------|----------|-------------|-------------|--------|
| C17 H20 N2 O2 | 284.1525       | 285.1598     | 285.1605 | -0.70       | -2.45       | 9.0000 |

HRESI (+) MS spectrum of compound **12**.

数据文件: C:\CHEM32\1\DATA\BIAOPIN\TEST 2021-09-18 14-39-22\20210826000001.D  
 样品名称: 5030

```

=====
操作者       : D-YI                      序列行 : 1
仪器         : 仪器 1                    位置   : 样品瓶 1
进样日期    : 2021-9-18 14:40:24        进样次数 : 1
                                           进样量 : 2.0 µl

来自于序列的不同进样量! 实际进样量: 1.0 µl
采集方法     : C:\CHEM32\1\DATA\BIAOPIN\TEST 2021-09-18 14-39-22\YBJ_LC.M
最后修改    : 2021-9-18 13:24:58 : D-YI
分析方法     : C:\CHEM32\1\DATA\TEST.M
最后修改    : 2021-9-18 14:35:44 : D-YI
                                           (调用后修改)
=====
  
```

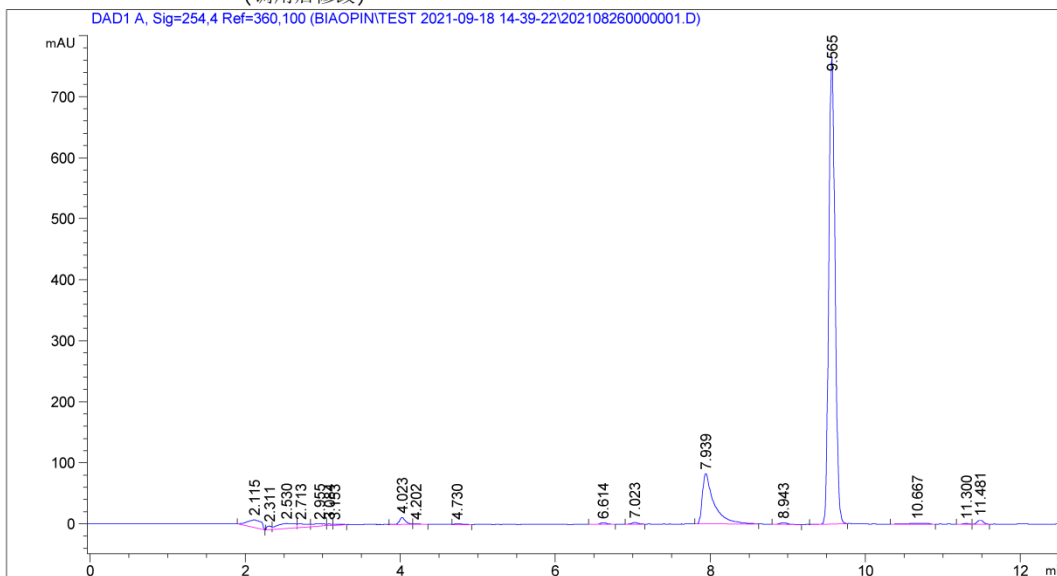

面积百分比报告

```

=====
排序           : 信号
乘积因子:     : 1.0000
稀释因子:     : 1.0000
内标使用乘积因子和稀释因子
=====
  
```

信号 1: DAD1 A, Sig=254,4 Ref=360,100

| 峰 # | 保留时间 [min] | 类型 | 峰宽 [min] | 峰面积 [mAU*s] | 峰高 [mAU] | 峰面积 %  |
|-----|------------|----|----------|-------------|----------|--------|
| 1   | 2.115      | BB | 0.1640   | 157.07436   | 12.37888 | 2.7089 |
| 2   | 2.311      | BV | 0.0566   | 22.60004    | 5.66219  | 0.3898 |
| 3   | 2.530      | VV | 0.1978   | 129.55679   | 8.13571  | 2.2343 |
| 4   | 2.713      | VV | 0.1183   | 55.03342    | 6.04006  | 0.9491 |
| 5   | 2.955      | VV | 0.1432   | 47.47268    | 4.09617  | 0.8187 |
| 6   | 3.084      | VV | 0.0612   | 11.77315    | 2.68457  | 0.2030 |
| 7   | 3.153      | VB | 0.0688   | 9.57563     | 1.72337  | 0.1651 |

仪器 1 2021-9-18 15:01:07 D-YI

页 1/2



数据文件: C:\CHEM32\1\DATA\BIAOPIN\TEST 2021-09-18 14-39-22\20210826000001.D  
样品名称: 5030

| 峰 # | 保留时间 [min] | 类型 | 峰宽 [min] | 峰面积 [mAU*s] | 峰高 [mAU]  | 峰面积 %   |
|-----|------------|----|----------|-------------|-----------|---------|
| 8   | 4.023      | VV | 0.0836   | 62.73681    | 11.15264  | 1.0820  |
| 9   | 4.202      | VV | 0.1034   | 9.67289     | 1.38573   | 0.1668  |
| 10  | 4.730      | VB | 0.0983   | 9.97415     | 1.48610   | 0.1720  |
| 11  | 6.614      | BV | 0.1015   | 16.82634    | 2.53405   | 0.2902  |
| 12  | 7.023      | BB | 0.0856   | 15.39555    | 2.65823   | 0.2655  |
| 13  | 7.939      | BV | 0.1467   | 867.18610   | 82.45864  | 14.9554 |
| 14  | 8.943      | BB | 0.1087   | 19.81525    | 2.79574   | 0.3417  |
| 15  | 9.565      | VV | 0.0875   | 4288.22754  | 763.95282 | 73.9543 |
| 16  | 10.667     | BV | 0.2304   | 30.70580    | 1.67113   | 0.5295  |
| 17  | 11.300     | BV | 0.0860   | 7.85068     | 1.34721   | 0.1354  |
| 18  | 11.481     | VB | 0.0845   | 37.00320    | 6.90287   | 0.6382  |

总量 : 5798.48036 919.06612

\*\*\* 报告结束 \*\*\*

## HPLC spectrum of compound 12

数据文件: C:\CHEM32\1\DATA\BIAOPIN\TEST 2021-09-18 13-50-12\20210826000001.D  
 样品名称: 5005

```

=====
操作者      : D-YI                      序列行 : 1
仪器        : 仪器 1                    位置   : 样品瓶 1
进样日期    : 2021-9-18 13:51:18       进样次数 : 1
                                           进样量 : 2.0 µl

采集方法    : C:\CHEM32\1\DATA\BIAOPIN\TEST 2021-09-18 13-50-12\YBJ_LC.M
最后修改    : 2021-9-18 13:24:58 : D-YI
分析方法    : C:\CHEM32\1\DATA\TEST.M
最后修改    : 2021-9-18 15:02:17 : D-YI
                                           (调用后修改)
  
```

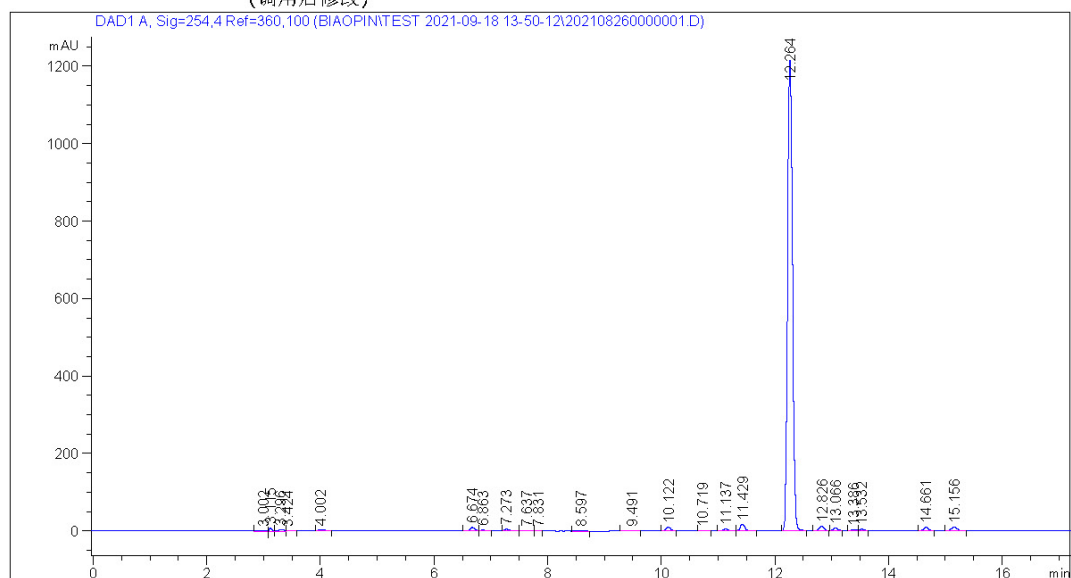

面积百分比报告

```

=====
排序          :      信号
乘积因子:      :      1.0000
稀释因子:      :      1.0000
内标使用乘积因子和稀释因子
  
```

信号 1: DAD1 A, Sig=254,4 Ref=360,100

| 峰 # | 保留时间 [min] | 类型 | 峰宽 [min] | 峰面积 [mAU*s] | 峰高 [mAU] | 峰面积 %  |
|-----|------------|----|----------|-------------|----------|--------|
| 1   | 3.002      | VB | 0.1334   | 37.78116    | 3.75387  | 0.4785 |
| 2   | 3.115      | BV | 0.0462   | 35.35271    | 10.80508 | 0.4478 |
| 3   | 3.296      | VV | 0.1272   | 35.82769    | 3.62865  | 0.4538 |
| 4   | 3.424      | VB | 0.0922   | 15.83005    | 2.36059  | 0.2005 |
| 5   | 4.002      | BV | 0.1286   | 26.30930    | 2.93482  | 0.3332 |
| 6   | 6.674      | VV | 0.0860   | 49.78949    | 8.80485  | 0.6306 |
| 7   | 6.863      | VB | 0.1012   | 13.45195    | 1.88558  | 0.1704 |
| 8   | 7.273      | VB | 0.0902   | 25.09378    | 4.29224  | 0.3178 |

仪器 1 2021-9-18 15:04:08 D-YI

页 1/2

HPLC spectrum of compound 12.



### User Spectra

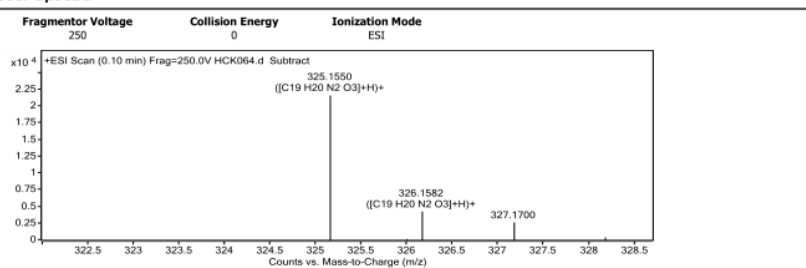

| <i>m/z</i> | <i>z</i> | Abund    | Formula       | Ion    |
|------------|----------|----------|---------------|--------|
| 137.9873   | 1        | 6913.56  |               |        |
| 211.0865   | 1        | 6363.12  |               |        |
| 239.0825   |          | 11894.25 |               |        |
| 240.0949   |          | 5776.55  |               |        |
| 254.105    |          | 11858.79 |               |        |
| 255.1128   | 1        | 59133.37 |               |        |
| 256.1173   | 1        | 11167.7  |               |        |
| 279.1129   | 1        | 22177.55 |               |        |
| 281.093    | 1        | 7425.93  |               |        |
| 283.1445   | 1        | 11973.04 |               |        |
| 285.1592   | 1        | 9491.42  |               |        |
| 297.1235   | 1        | 17422.19 |               |        |
| 325.155    | 1        | 21644.42 | C19 H20 N2 O3 | (M+H)+ |

#### Formula Calculator Element Limits

| Element | Min | Max |
|---------|-----|-----|
| C       | 3   | 60  |
| H       | 0   | 120 |
| O       | 0   | 30  |
| N       | 0   | 5   |

#### Formula Calculator Results

| Formula       | CalculatedMass | CalculatedMz | Mz       | Diff. (mDa) | Diff. (ppm) | DBE     |
|---------------|----------------|--------------|----------|-------------|-------------|---------|
| C19 H20 N2 O3 | 324.1474       | 325.1547     | 325.1550 | -0.30       | -0.92       | 11.0000 |

HRESI (+) MS spectrum of compound **13**.

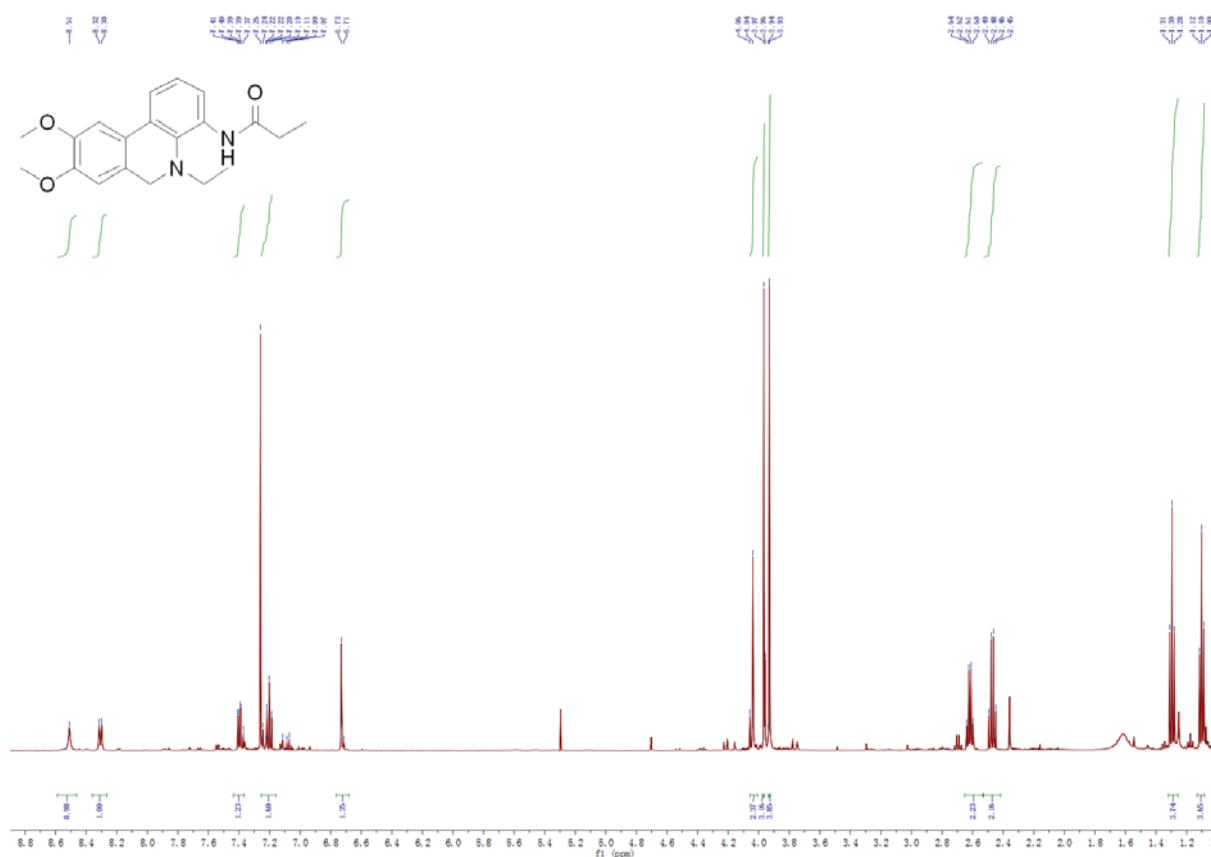

<sup>1</sup>H NMR (500 MHz) spectrum of compound **14** in CDCl<sub>3</sub>.

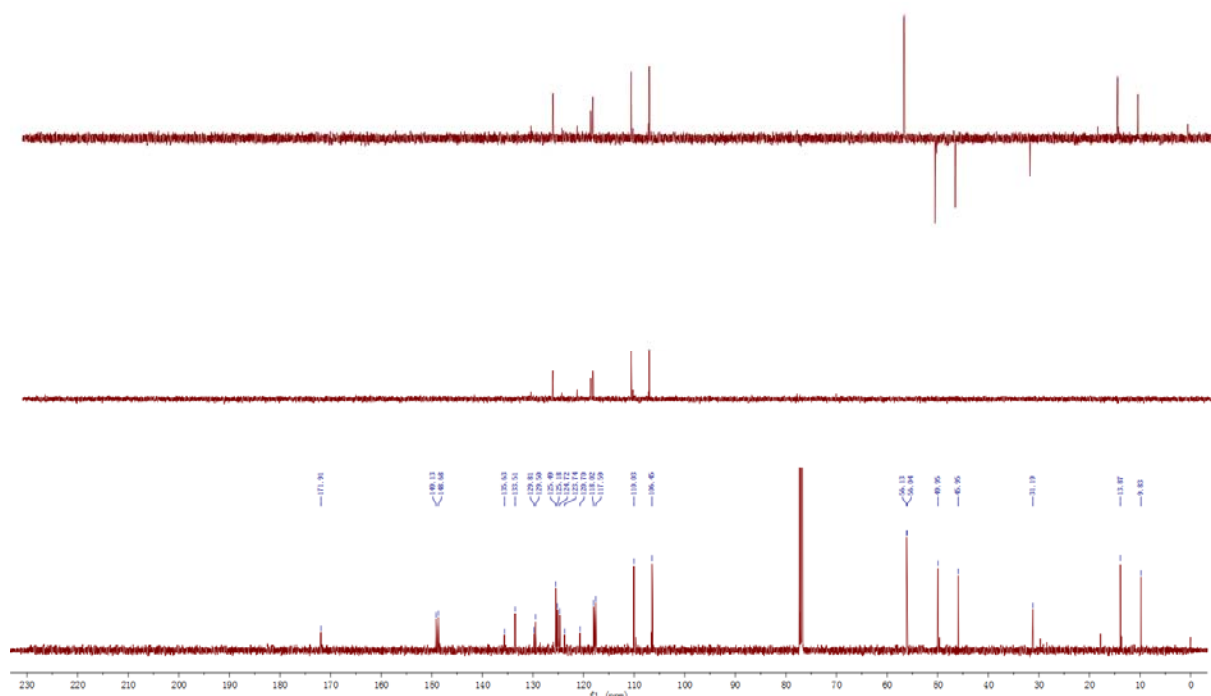

$^{13}\text{C}$  NMR (125 MHz) spectrum of compound **14** in  $\text{CDCl}_3$ .

#### User Spectra

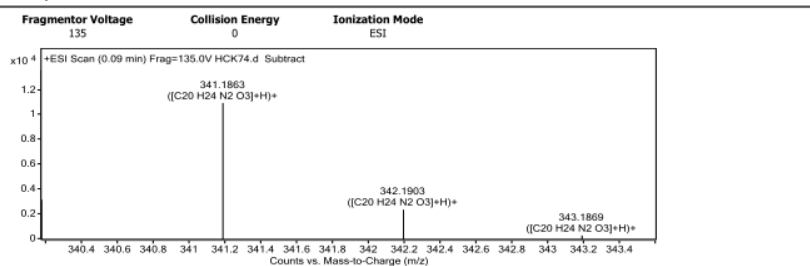

#### Peak List

| $m/z$    | $z$ | Abund    | Formula                                          | Ion                     |
|----------|-----|----------|--------------------------------------------------|-------------------------|
| 79.0216  | 1   | 83940.84 |                                                  |                         |
| 80.0246  | 1   | 2629.93  |                                                  |                         |
| 81.0172  | 1   | 4873.43  |                                                  |                         |
| 100.0146 |     | 1472.98  |                                                  |                         |
| 101.0037 |     | 2482.98  |                                                  |                         |
| 118.5087 |     | 2800.06  |                                                  |                         |
| 126.4943 |     | 1555.78  |                                                  |                         |
| 137.0022 |     | 2779.41  |                                                  |                         |
| 282.1491 | 1   | 3605.11  |                                                  |                         |
| 339.17   | 1   | 11716.73 |                                                  |                         |
| 340.1731 | 1   | 3229.81  |                                                  |                         |
| 341.1863 | 1   | 10970.16 | $\text{C}_{20}\text{H}_{24}\text{N}_2\text{O}_3$ | $(\text{M}+\text{H})^+$ |
| 342.1903 | 1   | 2408.18  | $\text{C}_{20}\text{H}_{24}\text{N}_2\text{O}_3$ | $(\text{M}+\text{H})^+$ |

#### Formula Calculator Element Limits

| Element | Min | Max |
|---------|-----|-----|
| C       | 3   | 60  |
| H       | 0   | 120 |
| O       | 0   | 30  |
| N       | 0   | 5   |

#### Formula Calculator Results

| Formula                                          | CalculatedMass | CalculatedMz | Mz       | Diff. (mDa) | Diff. (ppm) | DBE     |
|--------------------------------------------------|----------------|--------------|----------|-------------|-------------|---------|
| $\text{C}_{20}\text{H}_{24}\text{N}_2\text{O}_3$ | 340.1787       | 341.1860     | 341.1863 | -0.30       | -0.88       | 10.0000 |

HRESI (+) MS spectrum of compound **14**.

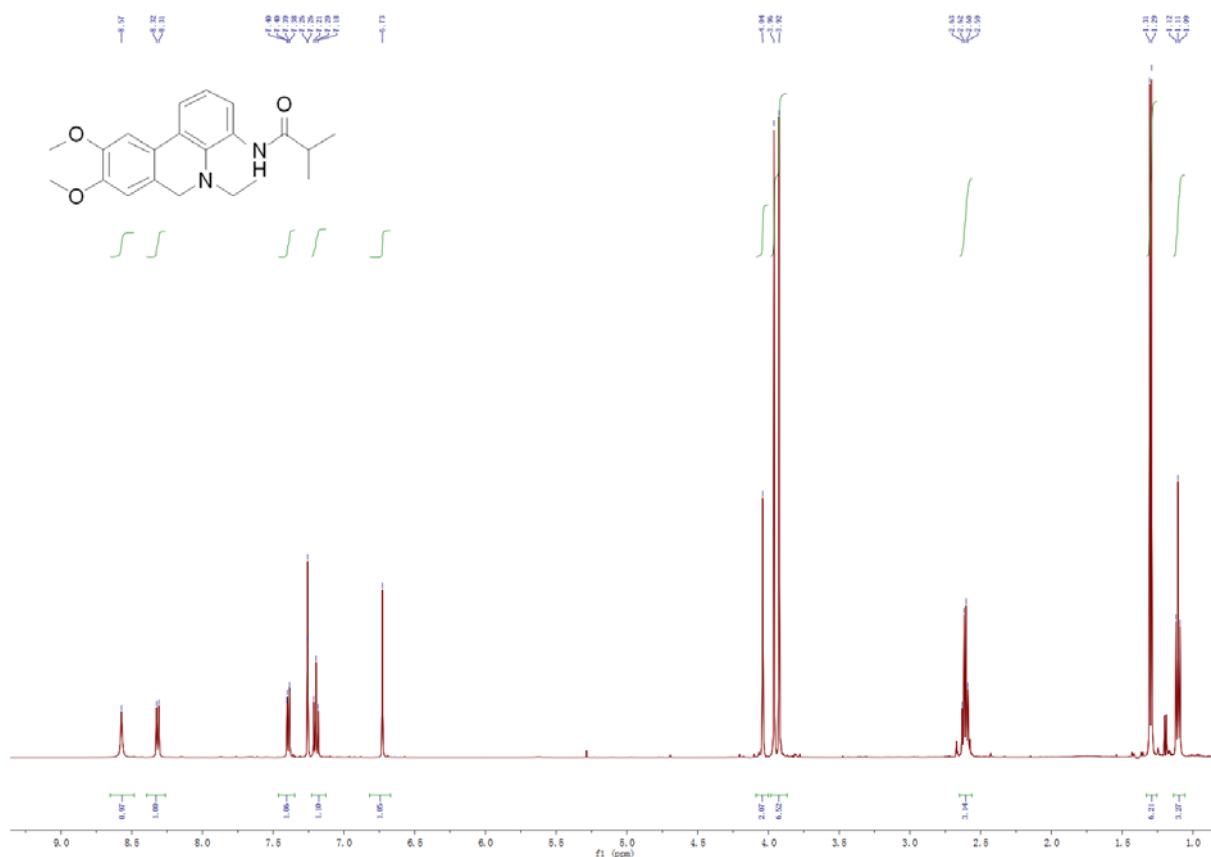

<sup>1</sup>H NMR (500 MHz) spectrum of compound **15** in CDCl<sub>3</sub>.

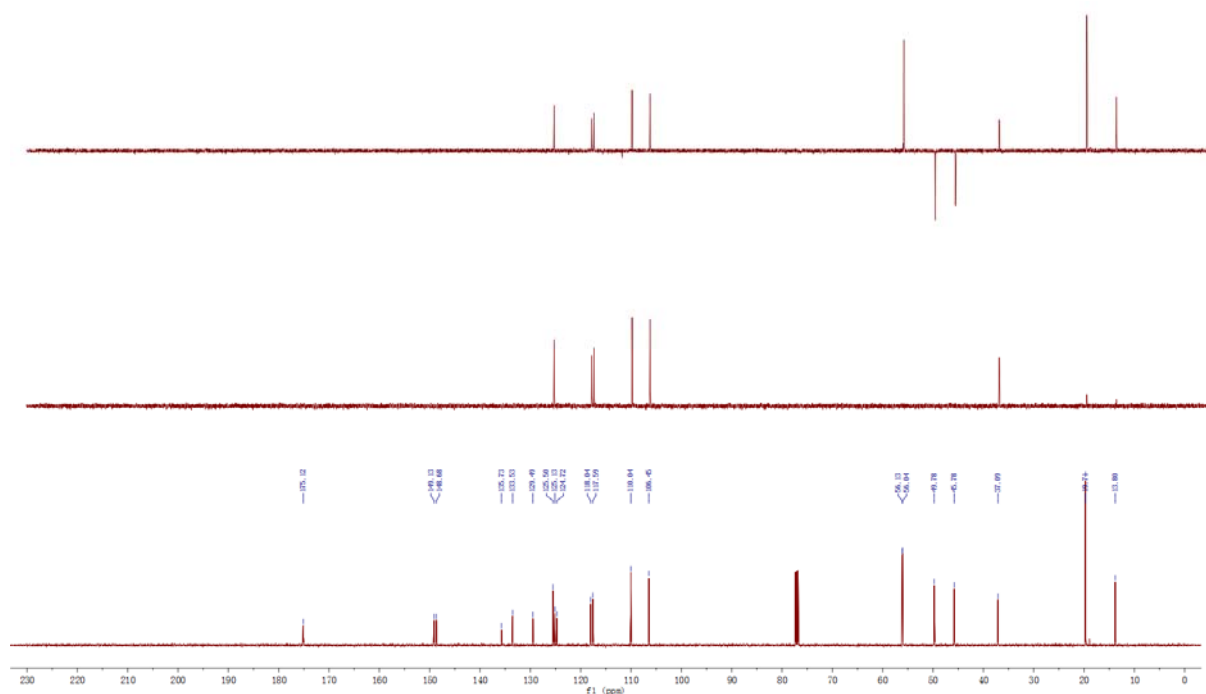

<sup>13</sup>C NMR (125 MHz) spectrum of compound **15** in CDCl<sub>3</sub>.

### User Spectra

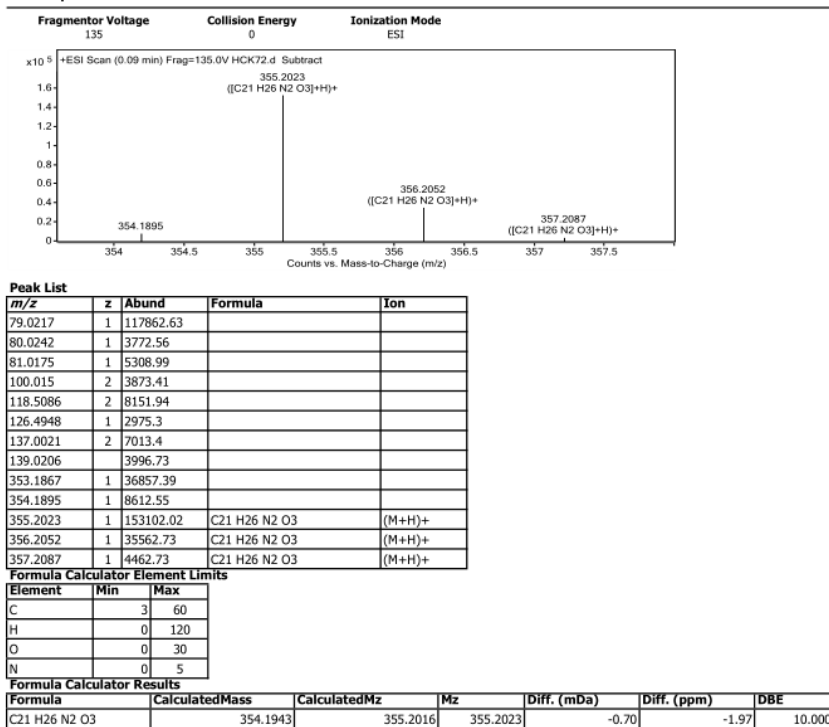

HRESI (+) MS spectrum of compound **15**.

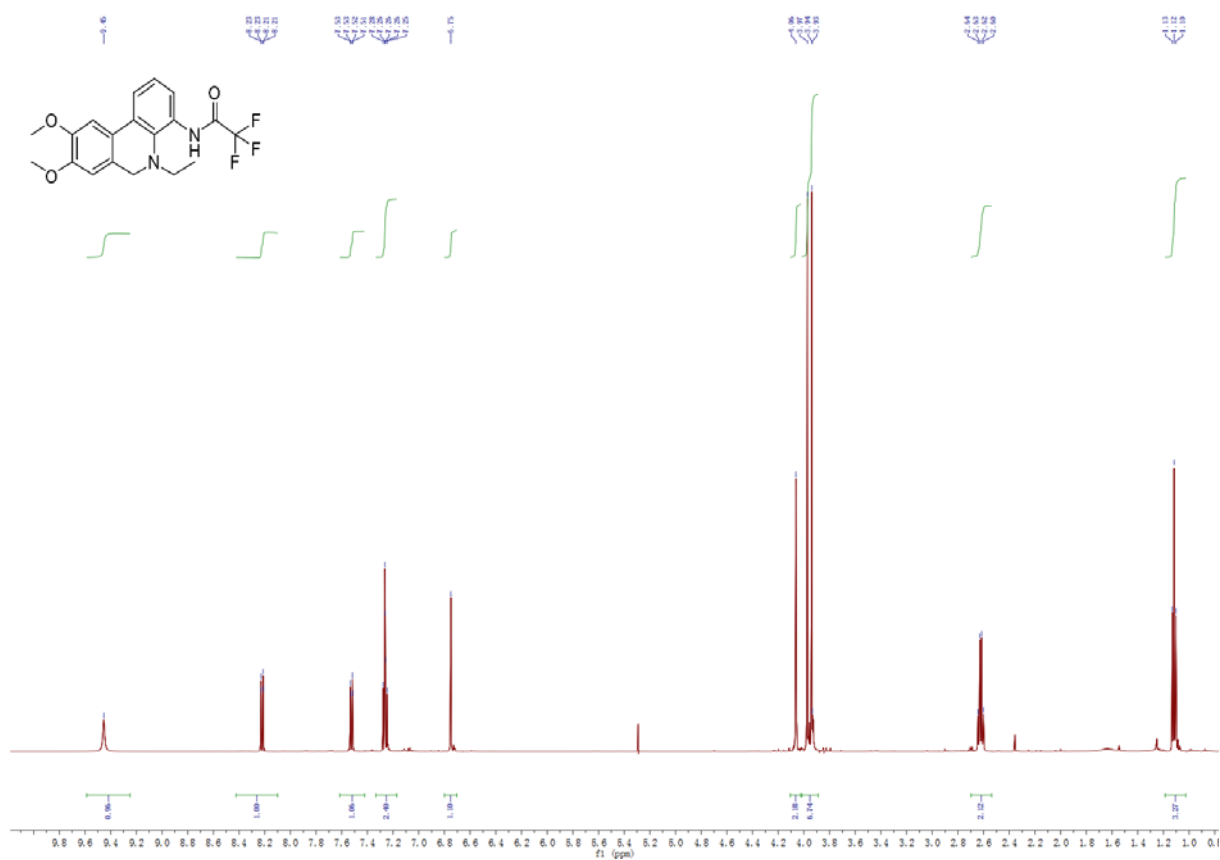

<sup>1</sup>H NMR (500 MHz) spectrum of compound **16** in CDCl<sub>3</sub>.

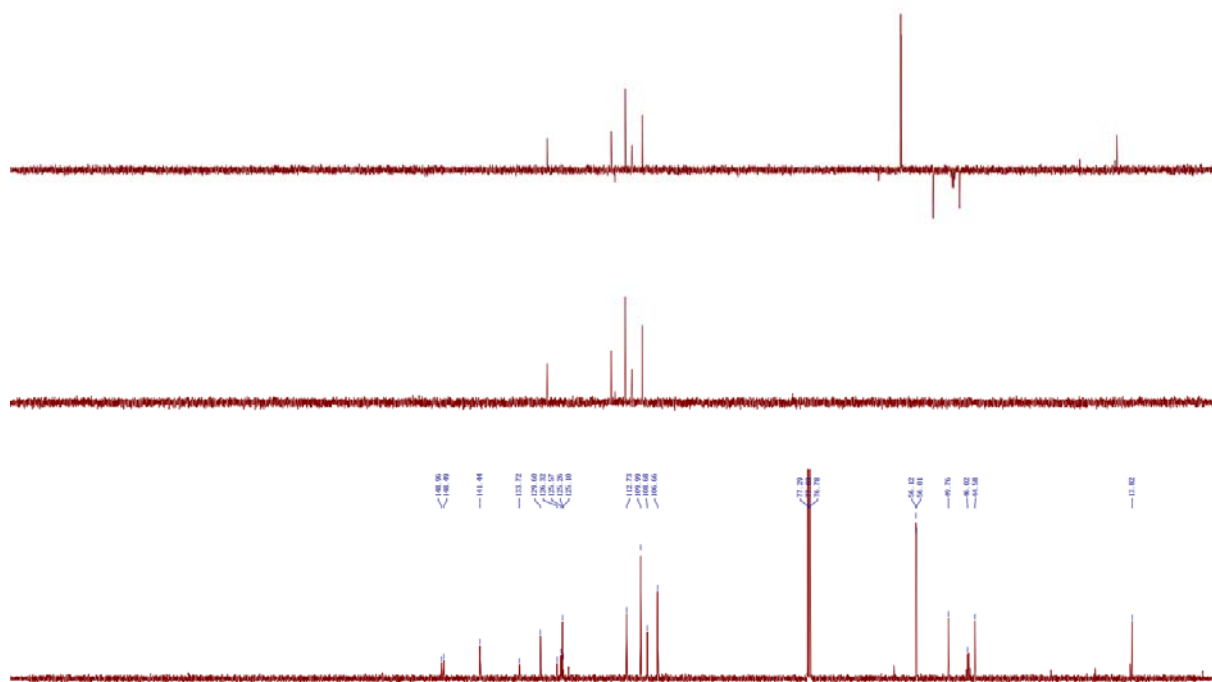

<sup>13</sup>C NMR (125 MHz) spectrum of compound **16** in CDCl<sub>3</sub>.

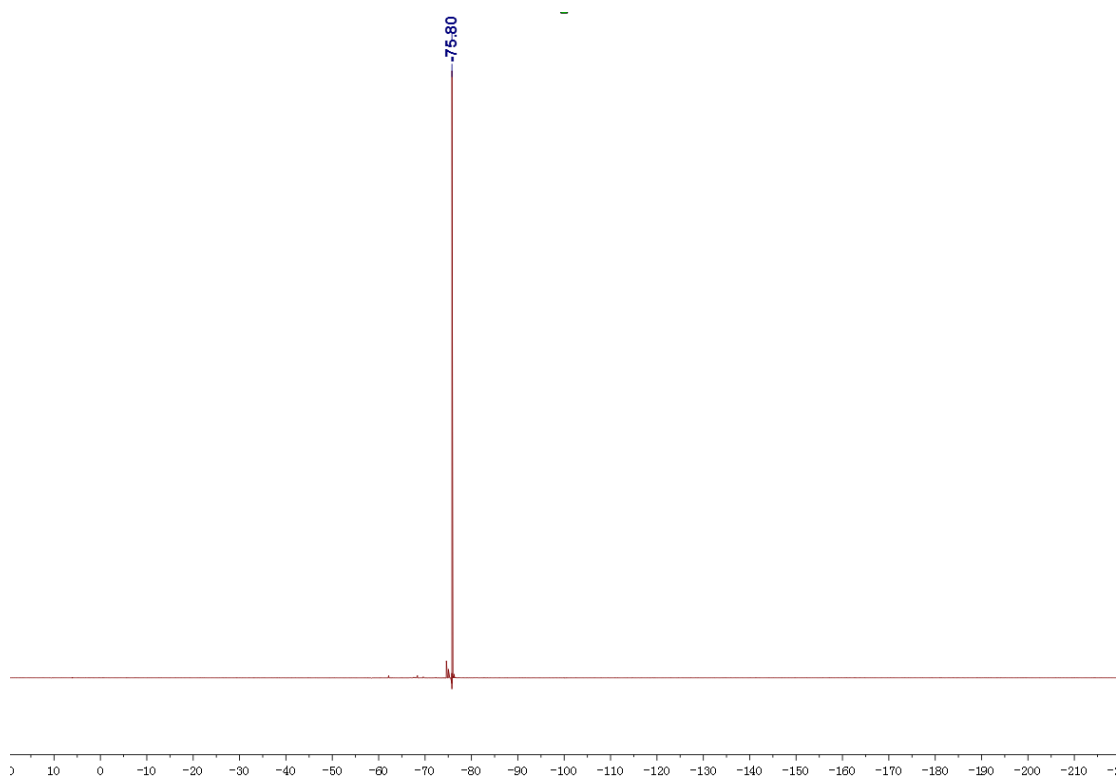

<sup>19</sup>F NMR (125 MHz) spectrum of compound **16** in CDCl<sub>3</sub>.



User Spectra

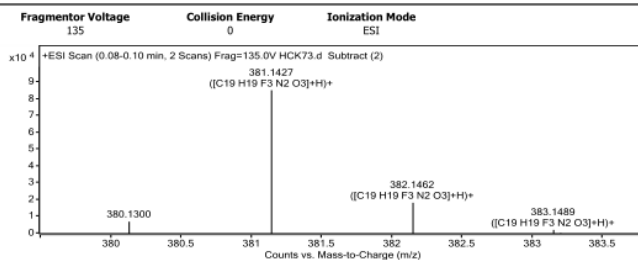

Peak List

| m/z      | z | Abund    | Formula          | Ion    |
|----------|---|----------|------------------|--------|
| 79.0218  | 1 | 91160.74 |                  |        |
| 80.0247  | 1 | 2724.77  |                  |        |
| 81.0175  | 1 | 4434     |                  |        |
| 118.5088 | 2 | 5275.65  |                  |        |
| 126.4947 |   | 4302.41  |                  |        |
| 137.0024 | 2 | 5592.55  |                  |        |
| 139.0211 | 2 | 2946.96  |                  |        |
| 157.5157 | 1 | 2555.25  |                  |        |
| 282.1494 | 1 | 7318.59  |                  |        |
| 379.1273 | 1 | 37916.16 |                  |        |
| 380.13   | 1 | 7319.82  |                  |        |
| 381.1427 | 1 | 85089.79 | C19 H19 F3 N2 O3 | (M+H)+ |
| 382.1462 | 1 | 18376.33 | C19 H19 F3 N2 O3 | (M+H)+ |

Formula Calculator Element Limits

| Element | Min | Max |
|---------|-----|-----|
| C       | 3   | 60  |
| H       | 0   | 120 |
| O       | 0   | 30  |
| N       | 0   | 5   |
| F       | 0   | 5   |

Formula Calculator Results

| Formula          | CalculatedMass | CalculatedMz | Mz       | Diff. (mDa) | Diff. (ppm) | DBE     |
|------------------|----------------|--------------|----------|-------------|-------------|---------|
| C19 H19 F3 N2 O3 | 380.1348       | 381.1421     | 381.1427 | -0.60       | -1.57       | 10.0000 |

HRESI (+) MS spectrum of compound **16**.

数据文件: C:\CHEM32\1\DATA\YBJ-1 2021-09-18 16-03-04\001-0101.D  
 样品名称: 5012

```

=====
操作者      : D-YI                      序列行 : 1
仪器        : 仪器 1                    位置   : 样品瓶 1
进样日期    : 2021-9-18 16:04:11       进样次数 : 1
                                           进样量 : 4.0 µl

采集方法    : C:\CHEM32\1\DATA\YBJ-1 2021-09-18 16-03-04\YBJ_LC.M
最后修改    : 2021-9-18 15:42:55 : D-YI
分析方法    : C:\CHEM32\1\DATA\YBJ-1 2021-09-18 16-03-04\001-0101.D\DA.M (YBJ_LC.M,
               从数据文件)
最后修改    : 2021-9-18 16:19:16 : D-YI
               (调用后修改)
=====
  
```

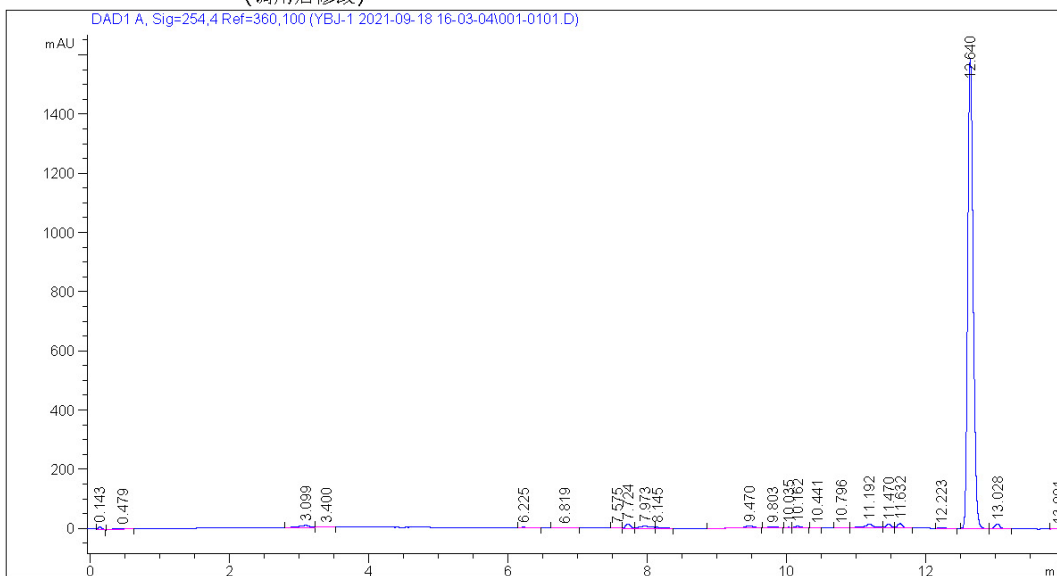

面积百分比报告

```

=====
排序          : 信号
乘积因子      : 1.0000
稀释因子      : 1.0000
内标使用乘积因子和稀释因子
=====
  
```

信号 1: DAD1 A, Sig=254,4 Ref=360,100

| 峰 # | 保留时间 [min] | 类型 | 峰宽 [min] | 峰面积 [mAU*s] | 峰高 [mAU] | 峰面积 %  |
|-----|------------|----|----------|-------------|----------|--------|
| 1   | 0.143      | BB | 0.0477   | 29.82464    | 9.74106  | 0.3091 |
| 2   | 0.479      | BV | 0.2087   | 56.26776    | 3.27111  | 0.5832 |
| 3   | 3.099      | BV | 0.1434   | 68.40977    | 6.57391  | 0.7090 |
| 4   | 3.400      | VB | 0.1376   | 11.51176    | 1.02073  | 0.1193 |
| 5   | 6.225      | BB | 0.1120   | 13.11769    | 1.59464  | 0.1360 |
| 6   | 6.819      | VB | 0.1363   | 15.30800    | 1.43634  | 0.1587 |
| 7   | 7.575      | BV | 0.0916   | 9.73285     | 1.63094  | 0.1009 |

仪器 1 2021-9-18 16:19:41 D-YI

页 1/2

数据文件: C:\CHEM32\1\DATA\YBJ-1 2021-09-18 16-03-04\001-0101.D  
样品名称: 5012

| 峰 # | 保留时间 [min] | 类型  | 峰宽 [min] | 峰面积 [mAU*s] | 峰高 [mAU]   | 峰面积 %   |
|-----|------------|-----|----------|-------------|------------|---------|
| 8   | 7.724      | VV  | 0.0703   | 63.62310    | 13.66659   | 0.6594  |
| 9   | 7.973      | VV  | 0.1792   | 82.22714    | 6.89059    | 0.8522  |
| 10  | 8.145      | VB  | 0.1072   | 26.65921    | 3.56869    | 0.2763  |
| 11  | 9.470      | BB  | 0.1644   | 86.87325    | 7.43017    | 0.9004  |
| 12  | 9.803      | BB  | 0.1213   | 18.40181    | 2.35121    | 0.1907  |
| 13  | 10.035     | BV  | 0.0702   | 6.20205     | 1.38685    | 0.0643  |
| 14  | 10.162     | VB  | 0.0941   | 31.34312    | 5.07455    | 0.3248  |
| 15  | 10.441     | BV  | 0.0673   | 5.59819     | 1.27219    | 0.0580  |
| 16  | 10.796     | BB  | 0.1074   | 10.04907    | 1.40584    | 0.1042  |
| 17  | 11.192     | BV  | 0.1365   | 123.77792   | 12.39983   | 1.2829  |
| 18  | 11.470     | VV  | 0.0851   | 66.07772    | 11.83873   | 0.6848  |
| 19  | 11.632     | VB  | 0.0764   | 76.07918    | 15.20432   | 0.7885  |
| 20  | 12.223     | BB  | 0.1036   | 16.41424    | 2.28993    | 0.1701  |
| 21  | 12.640     | BV  | 0.0862   | 8734.36816  | 1588.40430 | 90.5243 |
| 22  | 13.028     | VB  | 0.0783   | 84.52987    | 16.34697   | 0.8761  |
| 23  | 13.901     | VBA | 0.0903   | 12.24708    | 1.82472    | 0.1269  |

总量 : 9648.64359 1716.62421

=====  
\*\*\* 报告结束 \*\*\*

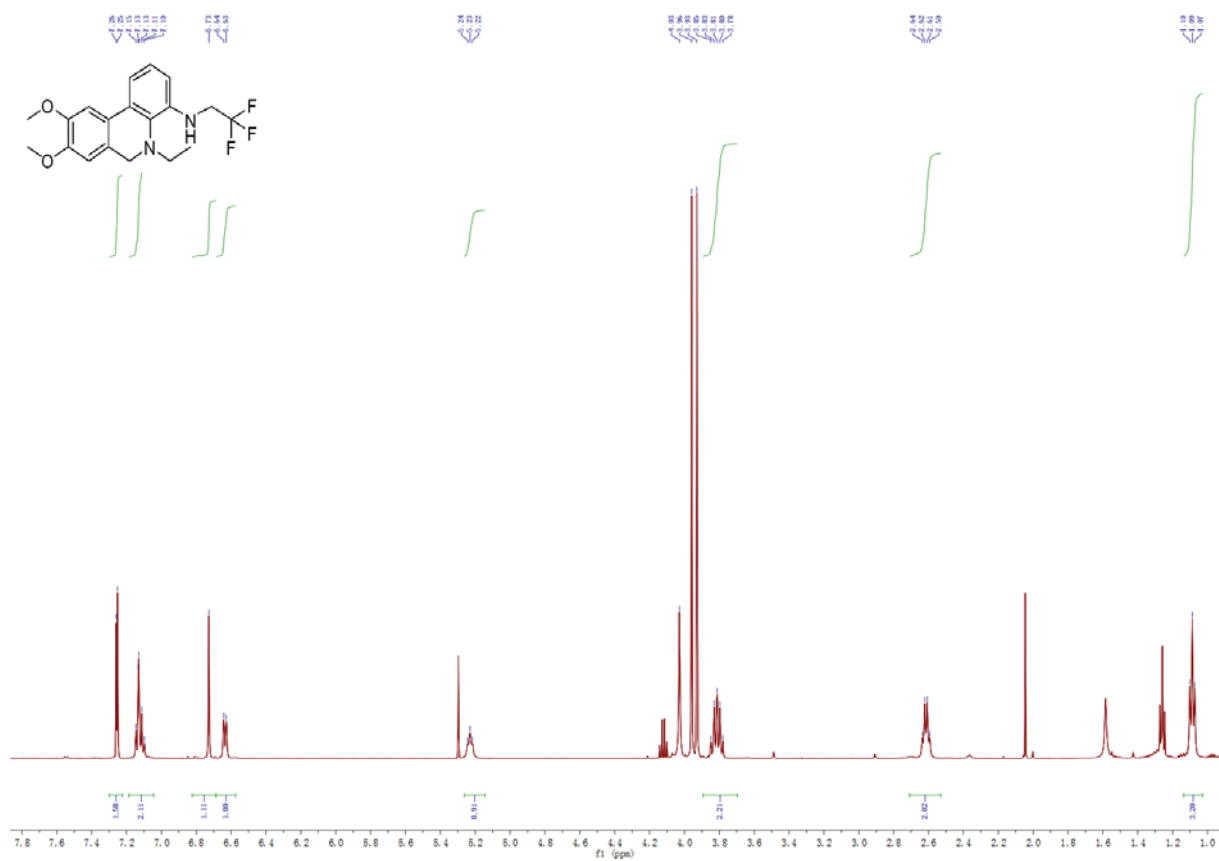

<sup>1</sup>H NMR (500 MHz) spectrum of compound 17 in CDCl<sub>3</sub>.

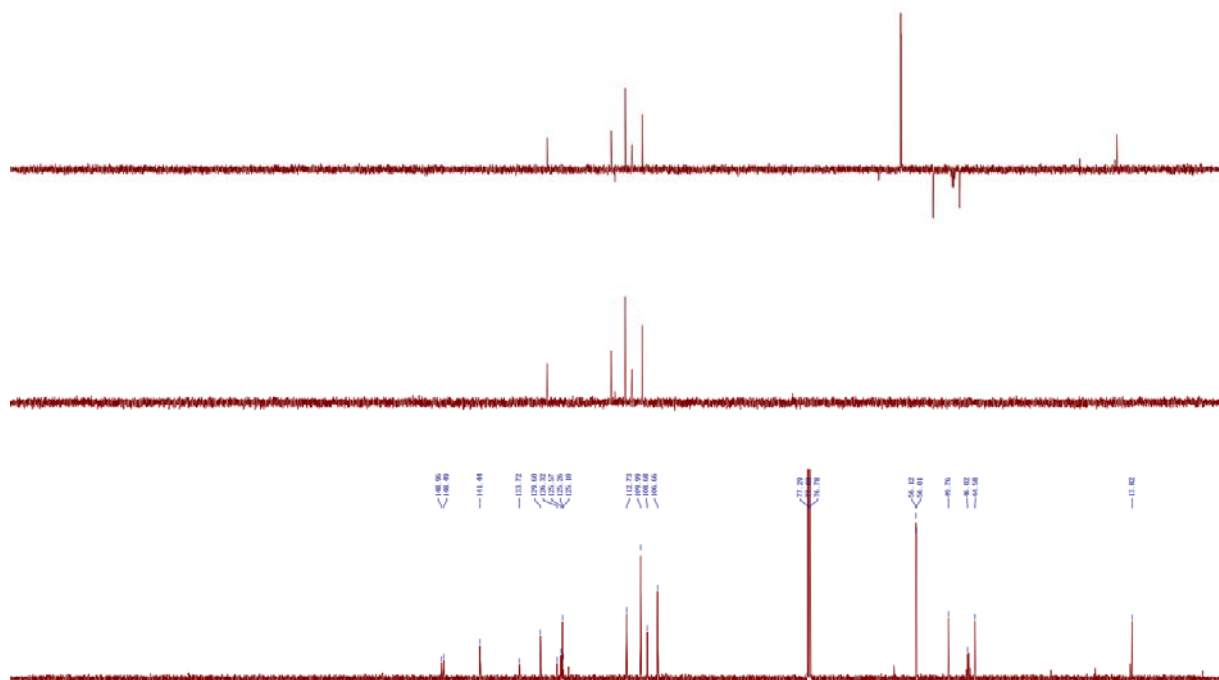

<sup>13</sup>C NMR (125 MHz) spectrum of compound 17 in CDCl<sub>3</sub>.

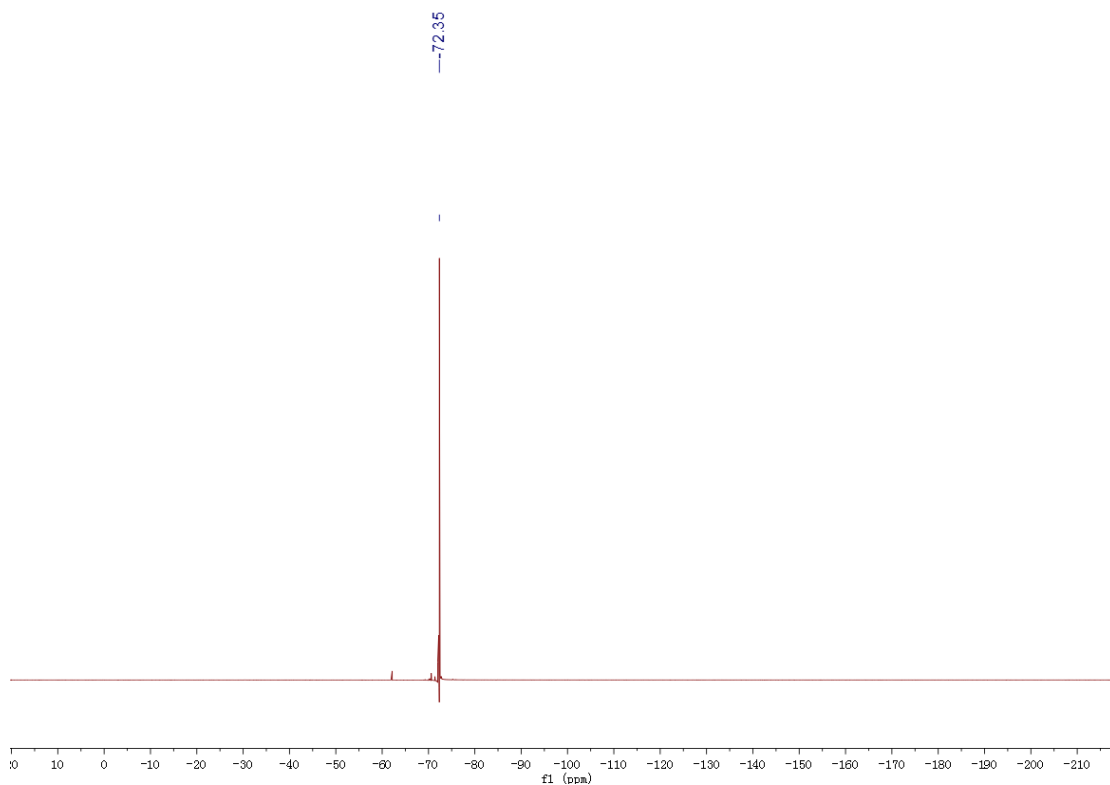

$^{19}\text{F}$  NMR (125 MHz) spectrum of compound **17** in  $\text{CDCl}_3$

User Spectra

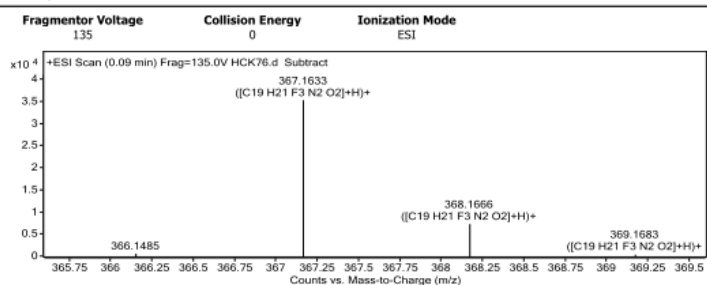

Peak List

| m/z      | z | Abund    | Formula          | Ion    |
|----------|---|----------|------------------|--------|
| 79.0217  | 1 | 59457.6  |                  |        |
| 80.0244  | 1 | 2064.65  |                  |        |
| 118.5085 | 2 | 2079.85  |                  |        |
| 132.1021 |   | 1439.86  |                  |        |
| 137.0018 | 1 | 2398.7   |                  |        |
| 240.9873 | 1 | 1508.35  |                  |        |
| 282.1496 | 1 | 2098.28  |                  |        |
| 284.1645 | 1 | 4209.11  |                  |        |
| 365.146  | 1 | 4457.27  |                  |        |
| 367.1633 | 1 | 35396.29 | C19 H21 F3 N2 O2 | (M+H)+ |
| 368.1666 | 1 | 7429.36  | C19 H21 F3 N2 O2 | (M+H)+ |
| 399.1521 |   | 2188.59  |                  |        |
| 409.1738 | 1 | 2237.31  |                  |        |

Formula Calculator Element Limits

| Element | Min | Max |
|---------|-----|-----|
| C       | 3   | 60  |
| H       | 0   | 120 |
| O       | 0   | 30  |
| N       | 0   | 5   |
| F       | 0   | 5   |

Formula Calculator Results

| Formula          | CalculatedMass | CalculatedMz | Mz       | Diff. (mDa) | Diff. (ppm) | DBE    |
|------------------|----------------|--------------|----------|-------------|-------------|--------|
| C19 H21 F3 N2 O2 | 366.1555       | 367.1628     | 367.1633 | -0.50       | -1.36       | 9.0000 |

HRESI (+) MS spectrum of compound **17**.

数据文件: C:\CHEM32\1\DATA\BIAOPIN\TEST 2021-09-18 13-50-12\20210826000001.D  
 样品名称: 5005

```

=====
操作者      : D-YI                      序列行 : 1
仪器        : 仪器 1                    位置   : 样品瓶 1
进样日期    : 2021-9-18 13:51:18       进样次数 : 1
                                           进样量  : 2.0 µl

采集方法    : C:\CHEM32\1\DATA\BIAOPIN\TEST 2021-09-18 13-50-12\YBJ_LC.M
最后修改    : 2021-9-18 13:24:58 : D-YI
分析方法    : C:\CHEM32\1\DATA\TEST.M
最后修改    : 2021-9-18 15:02:17 : D-YI
                                           (调用后修改)
  
```

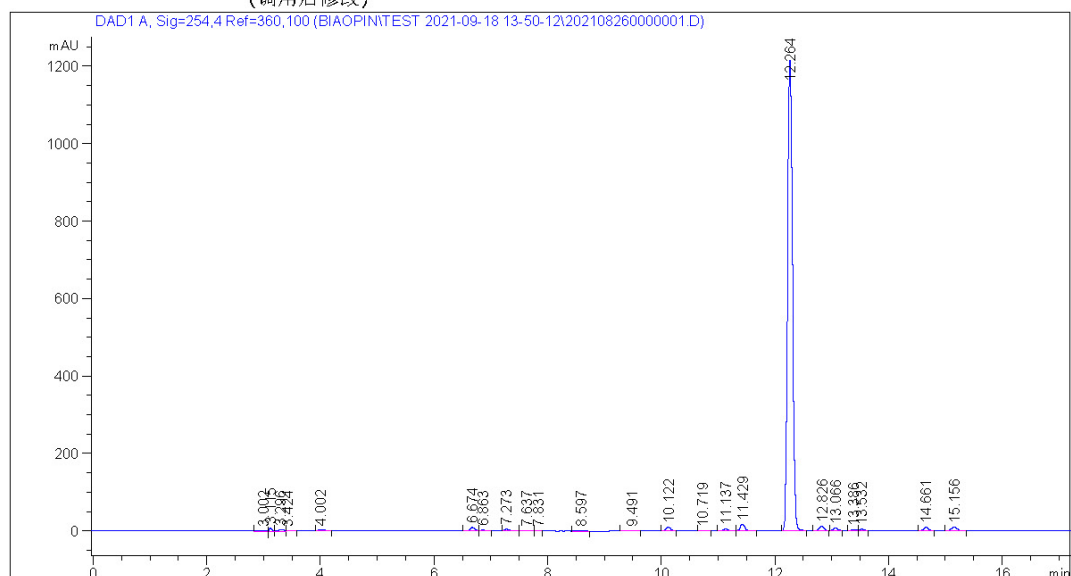

面积百分比报告

```

=====
排序          :      信号
乘积因子:      :      1.0000
稀释因子:      :      1.0000
内标使用乘积因子和稀释因子
  
```

信号 1: DAD1 A, Sig=254,4 Ref=360,100

| 峰 # | 保留时间 [min] | 类型 | 峰宽 [min] | 峰面积 [mAU*s] | 峰高 [mAU] | 峰面积 %  |
|-----|------------|----|----------|-------------|----------|--------|
| 1   | 3.002      | VB | 0.1334   | 37.78116    | 3.75387  | 0.4785 |
| 2   | 3.115      | BV | 0.0462   | 35.35271    | 10.80508 | 0.4478 |
| 3   | 3.296      | VV | 0.1272   | 35.82769    | 3.62865  | 0.4538 |
| 4   | 3.424      | VB | 0.0922   | 15.83005    | 2.36059  | 0.2005 |
| 5   | 4.002      | BV | 0.1286   | 26.30930    | 2.93482  | 0.3332 |
| 6   | 6.674      | VV | 0.0860   | 49.78949    | 8.80485  | 0.6306 |
| 7   | 6.863      | VB | 0.1012   | 13.45195    | 1.88558  | 0.1704 |
| 8   | 7.273      | VB | 0.0902   | 25.09378    | 4.29224  | 0.3178 |

数据文件: C:\CHEM32\1\DATA\BIAOPIN\TEST 2021-09-18 13-50-12\20210826000001.D  
样品名称: 5005

| 峰 # | 保留时间 [min] | 类型 | 峰宽 [min] | 峰面积 [mAU*s] | 峰高 [mAU]   | 峰面积 %   |
|-----|------------|----|----------|-------------|------------|---------|
| 9   | 7.637      | BV | 0.1186   | 9.56527     | 1.13223    | 0.1212  |
| 10  | 7.831      | VB | 0.0715   | 7.11381     | 1.44280    | 0.0901  |
| 11  | 8.597      | BB | 0.1090   | 11.34892    | 1.48797    | 0.1437  |
| 12  | 9.491      | VB | 0.1584   | 12.91430    | 1.10434    | 0.1636  |
| 13  | 10.122     | BV | 0.0839   | 52.46339    | 9.89437    | 0.6645  |
| 14  | 10.719     | VB | 0.1036   | 8.99609     | 1.09836    | 0.1139  |
| 15  | 11.137     | BV | 0.0995   | 33.73194    | 4.94880    | 0.4273  |
| 16  | 11.429     | VB | 0.0857   | 97.32494    | 17.81621   | 1.2327  |
| 17  | 12.264     | BV | 0.0951   | 7192.69775  | 1214.54956 | 91.1041 |
| 18  | 12.826     | BB | 0.0823   | 56.06670    | 10.49434   | 0.7102  |
| 19  | 13.066     | BB | 0.0852   | 37.60786    | 6.94115    | 0.4763  |
| 20  | 13.386     | BV | 0.0740   | 9.35492     | 1.81879    | 0.1185  |
| 21  | 13.532     | VB | 0.0624   | 15.65128    | 3.76991    | 0.1982  |
| 22  | 14.661     | VB | 0.0861   | 46.62008    | 8.48431    | 0.5905  |
| 23  | 15.156     | BV | 0.0962   | 64.13522    | 10.08231   | 0.8123  |

总量 : 7895.02861 1333.53112

=====  
峰加和报告  
=====

信号 1: DAD1 A, Sig=254,4 Ref=360,100  
=====

最终峰加和报告  
=====

信号 1: DAD1 A, Sig=254,4 Ref=360,100

\*\*\* 报告结束 \*\*\*

## Preparation of intermediates

### Synthesis of amide substrates

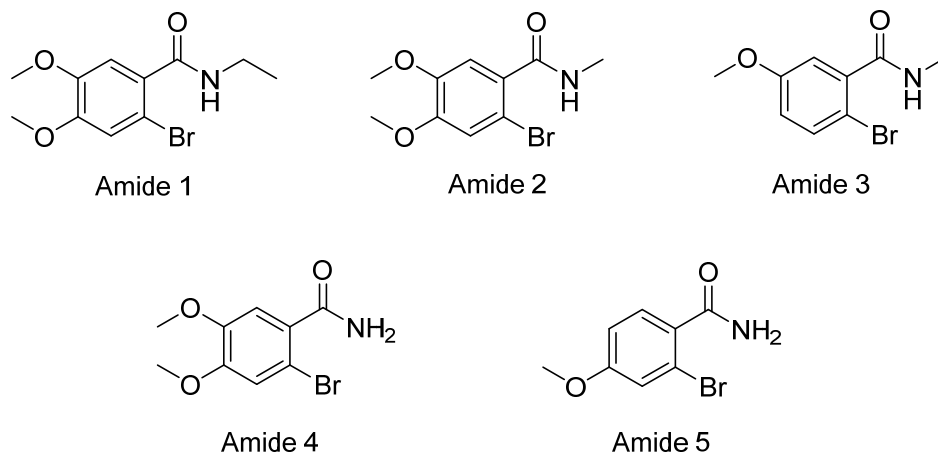

Synthetic procedures for these amides were already reported in the previous reports<sup>1</sup>. 2-bromo-4,5-dimethoxybenzoic acid, 2-bromo-4,5-dimethoxybenzoic acid, 2-bromo-5-methoxybenzoic acid, 2-bromo-4,5-dimethoxybenzoic acid or 2-bromo-4-methoxybenzoic acid (10 mmol) was dissolved in DCM (20 mL) respectively, to which  $\text{SOCl}_2$  (10 mL) was added. The reaction solution was stirred for 6 h at  $50^\circ\text{C}$ , and then concentrated to remove DCM. The residue was then added to a solution of methylamine or ethylamine in water at  $0^\circ\text{C}$  and filtered. The cake was purified by column chromatography to give Amide 1-5 as a pale yellow solid (yield 80-90%).

### Synthesis of intermediates 1a-1e

By referencing the synthesis method of 6-Phenanthridinones<sup>2</sup>, amide substrates were coupled to 1-iodo-2-ethylbenzene or 1-iodo-2-methylbenzene to afford compound **1a-1e**. A flask was charged under nitrogen with  $\text{Pd}(\text{OAc})_2$  (0.5 mmol), tri(2-furyl) phosphine (1.1 mmol),  $\text{K}_2\text{CO}_3$  (20 mmol), the amides 1-5 (10 mmol), a solution of norbornene (12 mmol) in anhydrous DMF (20 mL), and 1-iodo-2-methylbenzene or 1-iodo-2-ethylbenzene (11 mmol). The reaction mixture was heated with stirring at  $105^\circ\text{C}$  for 8 h and then cooled to r.t. After the addition of saturated  $\text{NH}_4\text{Cl}$  (50 mL) and extraction with EtOAc ( $3 \times 50$  mL), the combined organic extracts were washed



with brine (30 mL) and dried over Na<sub>2</sub>SO<sub>4</sub>. Removal of the solvent under reduced pressure gave the crude product, which was purified by flash chromatography on silica gel to furnish **1a-1e** as a colorless solid. (yield 75-85%).

### **Synthesis of intermediates 3a-3c**

By referencing the synthesis method of dihydrophenanthridines<sup>3</sup>, compounds **3a-3c** were synthesized through the reduction of compounds **1a-1c** in the presence of BH<sub>3</sub>-THF. To a stirred solution of **1a-1c** (1 mmol) in THF (2 ml) was added 1M BH<sub>3</sub>-THF (2 mL, 2 mmol) dropwise. After an 6 h stirring in an 60 °C oil bath and then quenched using H<sub>2</sub>O (5 mL), phases were separated and aqueous phase was extracted with EtOAc (2×20 mL). The combined organic phases were washed with brine, dried over MgSO<sub>4</sub>, filtered, and concentrated in vacuum. Crude product was purified by flash chromatography on silica gel to give **3a-3c** as colorless oil.(yield 10-80%).

Compounds **3b** and **3c** could also be prepared through the reduction of compounds **1** and **2**. To a stirred solution of **1** or **2** (1 mmol) in MeOH (2 ml) was added NaBH<sub>4</sub> (5 mmol). After an 2 h stirring at r.t. and then quenched using H<sub>2</sub>O (5 mL), the solvent was removed by evaporation. The residue was added H<sub>2</sub>O and extracted with (2×20 mL). The combined organic phases were washed with brine, dried over MgSO<sub>4</sub>, filtered, and concentrated in vacuum. Crude product was purified by flash chromatography on silica gel to give **3b** or **3c** as colorless oil. (yield 55-60%).

### **Synthesis of intermediates 5a**

Compound **3a** (1 mmol) was dissolved in CH<sub>2</sub>Cl<sub>2</sub> (5 ml). The reaction solution was then cooled to -78 °C and BBr<sub>3</sub> (0.4 mL, 4 mmol) was added dropwise. After an 6 h stirring at room temperature and then quenched using saturated aqueous NaHCO<sub>3</sub> (10 mL), phases were separated and aqueous phase was extracted with CH<sub>2</sub>Cl<sub>2</sub> (2×20 mL). The combined organic phases were washed with brine, dried over MgSO<sub>4</sub>, filtered, and concentrated in vacuum. Crude product was purified by flash chromatography on silica gel to give **5a** as a a yellow solid.(yield 65%).

### **Characterization data of intermediates**

#### **8,9-dimethoxy-4-methylphenanthridin-6(5H)-one (1a)**

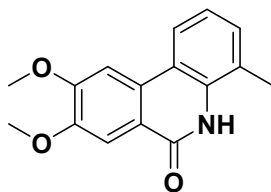

$^1\text{H}$  NMR (500 MHz,  $\text{CDCl}_3$ )  $\delta_{\text{H}}$  8.69 (s, 1H), 7.98 (d,  $J = 8.1$  Hz, 1H), 7.89 (s, 1H), 7.62 (s, 1H), 7.29 (dd,  $J = 10.0, 4.6$  Hz, 1H), 7.19 – 7.12 (m, 1H), 4.08 (s, 3H), 4.04 (s, 3H), 2.48 (s, 3H).  $^{13}\text{C}$  NMR (125 MHz,  $\text{CDCl}_3$ )  $\delta_{\text{C}}$  161.4 (C), 153.7 (C), 149.8 (C), 133.7 (C), 130.0 (CH), 129.9 (C), 123.0 (C), 122.3 (CH), 120.6 (CH), 119.3 (C), 118.3 (C), 108.4 (CH), 103.2 (CH), 56.3 ( $\text{CH}_3$ ), 56.2 ( $\text{CH}_3$ ), 17.0 ( $\text{CH}_3$ ). ESI $^+$   $m/z$ : 270  $[\text{M}+\text{H}]^+$ .

**4-ethyl-9-methoxyphenanthridin-6(5H)-one (1b)**

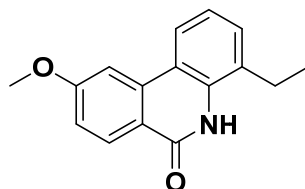

$^1\text{H}$  NMR (500 MHz,  $\text{CDCl}_3$ )  $\delta_{\text{H}}$  8.59 (s, 1H), 8.44 (d,  $J = 8.8$  Hz, 1H), 8.04 (d,  $J = 8.0$  Hz, 1H), 7.66 (t,  $J = 7.6$  Hz, 1H), 7.36 (dd,  $J = 9.5, 4.3$  Hz, 1H), 7.25 – 7.21 (m, 1H), 7.16 (dd,  $J = 8.8, 2.4$  Hz, 1H), 4.00 (s, 3H), 2.89 – 2.76 (m, 2H), 1.35 (t, 7.4 Hz, 3H).  $^{13}\text{C}$  NMR (125 MHz,  $\text{CDCl}_3$ )  $\delta_{\text{C}}$  163.4 (C), 162.0 (C), 137.2 (C), 134.0 (C), 130.5 (CH), 129.0 (CH), 128.8 (C), 122.4 (CH), 121.1 (CH), 119.1 (C), 118.4 (C), 115.7 (CH), 105.3 (CH), 55.6 ( $\text{CH}_3$ ), 23.6 ( $\text{CH}_2$ ), 13.6 ( $\text{CH}_3$ ). ESI $^+$   $m/z$ : 254  $[\text{M}+\text{H}]^+$ .

**4-ethyl-8,9-dimethoxy-5-methylphenanthridin-6(5H)-one (1c)**

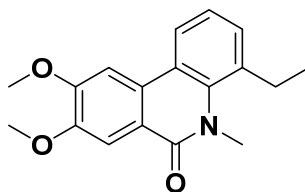

$^1\text{H}$  NMR (500 MHz,  $\text{CDCl}_3$ )  $\delta_{\text{H}}$  7.98 (d,  $J = 7.1$  Hz, 1H), 7.89 (s, 1H), 7.56 (s, 1H), 7.35 (d,  $J = 6.8$  Hz, 1H), 7.31 – 6.93 (m, 2H), 4.07 (s, 3H), 4.04 (s, 3H), 3.79 (s, 3H), 3.02 (q,  $J = 7.5$  Hz, 2H), 1.50 – 1.06 (m, 3H).  $^{13}\text{C}$  NMR (125 MHz,  $\text{CDCl}_3$ )  $\delta_{\text{C}}$  163.9 (C), 153.3 (C), 149.7 (C), 138.7 (C), 132.8 (C), 131.1 (CH), 128.9 (C), 122.9 (CH), 121.3 (C), 120.3 (CH), 119.4 (C), 108.7 (CH), 102.9 (CH), 56.3 ( $\text{CH}_3$ ), 56.1 ( $\text{CH}_3$ ), 38.6 ( $\text{CH}_3$ ), 28.3 ( $\text{CH}_2$ ), 15.6 ( $\text{CH}_3$ ). ESI $^+$   $m/z$ : 298  $[\text{M}+\text{H}]^+$ .

**8-methoxy-4,5-dimethylphenanthridin-6(5H)-one (1d)**

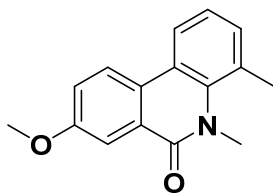

$^1\text{H}$  NMR (500 MHz,  $\text{CDCl}_3$ )  $\delta_{\text{H}}$  8.07 – 8.04 (m, 1H), 7.96 – 7.93 (m, 1H), 7.87 (t,  $J = 2.7$  Hz, 1H), 7.27 – 7.23 (m, 1H), 7.21 (dd,  $J = 7.4, 0.7$  Hz, 1H), 7.14 (dd,  $J = 9.7, 5.6$  Hz, 1H), 3.92 (s, 3H), 3.78 (s, 3H), 2.62 (s, 3H).  $^{13}\text{C}$  NMR (125 MHz,  $\text{CDCl}_3$ )  $\delta_{\text{C}}$  163.8 (C), 159.2 (C), 138.3 (C), 132.6 (CH), 127.4 (C), 126.5 (C), 125.9 (C), 123.6 (CH), 122.7 (CH), 122.1 (CH), 121.2 (C), 120.3 (CH), 108.7 (CH), 55.5 ( $\text{CH}_3$ ), 38.3 ( $\text{CH}_3$ ), 23.5 ( $\text{CH}_3$ ). ESI $^+$   $m/z$ : 254 [ $M+\text{H}$ ] $^+$ .

**5-ethyl-8,9-dimethoxy-4-methylphenanthridin-6(5H)-one (1e)**

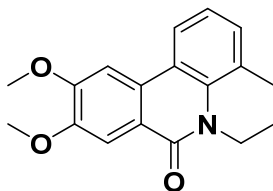

$^1\text{H}$  NMR (500 MHz,  $\text{CDCl}_3$ )  $\delta_{\text{H}}$  8.04 (t,  $J = 7.5$  Hz, 1H), 7.89 (s, 1H), 7.56 (s, 1H), 7.28 (dt,  $J = 8.8, 4.4$  Hz, 1H), 7.19 (t,  $J = 7.6$  Hz, 1H), 4.50 (q,  $J = 7.0$  Hz, 2H), 4.07 (s, 3H), 4.03 (s, 3H), 2.70 (s, 3H), 1.36 (t,  $J = 7.0$  Hz, 3H).  $^{13}\text{C}$  NMR (125 MHz,  $\text{CDCl}_3$ )  $\delta_{\text{C}}$  163.7 (C), 153.3 (C), 149.7 (C), 137.9 (C), 133.4 (CH), 128.8 (C), 126.0 (C), 122.5 (CH), 121.6 (C), 120.9 (CH), 119.7 (C), 108.8 (CH), 102.9 (CH), 56.2 ( $\text{CH}_3$ ), 56.1 ( $\text{CH}_3$ ), 42.5 ( $\text{CH}_2$ ), 24.0 ( $\text{CH}_3$ ), 15.0 ( $\text{CH}_3$ ). ESI $^+$   $m/z$ : 298 [ $M+\text{H}$ ] $^+$ .

**4-ethyl-8,9-dimethoxy-5-methyl-5,6-dihydrophenanthridine (3a)**

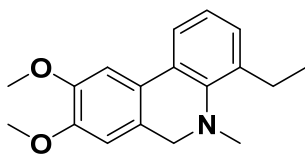

$^1\text{H}$  NMR (500 MHz,  $\text{CDCl}_3$ )  $\delta_{\text{H}}$  7.56 (dt,  $J = 8.7, 4.4$  Hz, 1H), 7.26 (d,  $J = 5.4$  Hz, 1H), 7.22 – 7.07 (m, 2H), 6.75 (s, 1H), 4.02 (s, 2H), 3.97 (s, 3H), 3.93 (s, 3H), 2.81 (q,  $J = 7.5$  Hz, 2H), 2.48 (s, 3H), 1.43 – 1.16 (m, 3H).  $^{13}\text{C}$  NMR (125 MHz,  $\text{CDCl}_3$ )  $\delta_{\text{C}}$  148.9 (C), 148.5 (C), 145.6 (C), 139.6 (C), 129.3 (C), 127.7 (CH), 125.4 (C), 125.0 (C), 124.6 (CH), 120.9 (CH), 109.9 (CH), 106.6 (CH), 56.1 ( $\text{CH}_3$ ), 56.0 ( $\text{CH}_3$ ), 55.0 ( $\text{CH}_2$ ), 41.3 ( $\text{CH}_3$ ), 23.2 ( $\text{CH}_2$ ), 14.9 ( $\text{CH}_3$ ). ESI $^+$   $m/z$ : 284 [ $M+\text{H}$ ] $^+$ .

**8,9-dimethoxy-4-methyl-5,6-dihydrophenanthridine (3b)**

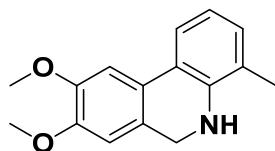

$^1\text{H}$  NMR (500 MHz,  $\text{CDCl}_3$ )  $\delta_{\text{H}}$  7.47 (d,  $J = 7.9$  Hz, 1H), 7.19 (s, 1H), 6.97 (d,  $J = 7.4$  Hz, 1H), 6.76 (t,  $J = 7.6$  Hz, 1H), 6.64 (s, 1H), 4.38 (s, 2H), 3.94 (s, 3H), 3.90 (s, 3H), 2.18 (s, 3H).  $^{13}\text{C}$  NMR (125 MHz,  $\text{CDCl}_3$ )  $\delta_{\text{C}}$  148.6 (C), 148.4 (C), 143.0 (C), 129.4 (CH), 125.1 (C), 125.1 (C), 121.9 (C), 121.5 (C), 120.8 (CH), 118.3 (CH), 109.1 (CH), 106.3 (CH), 56.1 ( $\text{CH}_3$ ), 56.0 ( $\text{CH}_3$ ), 46.0 ( $\text{CH}_2$ ), 17.1 ( $\text{CH}_3$ ). ESI $^+$   $m/z$ : 256 [ $M+\text{H}$ ] $^+$ .

#### 4-ethyl-9-methoxy-5,6-dihydrophenanthridine (3c)

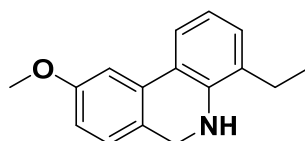

$^1\text{H}$  NMR (500 MHz,  $\text{CDCl}_3$ )  $\delta_{\text{H}}$  7.56 (dd,  $J = 7.8, 1.1$  Hz, 1H), 7.23 (d,  $J = 2.5$  Hz, 1H), 7.06 (s, 1H), 7.04 (s, 1H), 6.86 – 6.80 (m, 1H), 6.80 – 6.73 (m, 1H), 4.34 (s, 2H), 3.85 (s, 3H), 2.54 (q,  $J = 7.6$  Hz, 2H), 1.26 (t,  $J = 7.6$  Hz, 3H).  $^{13}\text{C}$  NMR (125 MHz,  $\text{CDCl}_3$ )  $\delta_{\text{C}}$  159.3 (C), 143.5 (C), 143.3 (C), 133.7 (C), 128.2 (CH), 126.7 (CH), 125.3 (C), 121.7 (C), 121.7 (CH), 118.6 (CH), 112.5 (CH), 108.3 (CH), 55.4 ( $\text{CH}_3$ ), 45.8 ( $\text{CH}_2$ ), 23.9 ( $\text{CH}_2$ ), 13.2 ( $\text{CH}_3$ ). ESI $^+$   $m/z$ : 240 [ $M+\text{H}$ ] $^+$ .

#### 4-ethyl-5-methyl-5,6-dihydrophenanthridine-8,9-diol (5a)

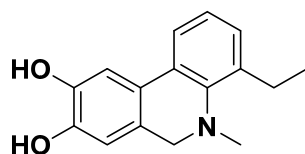

$^1\text{H}$  NMR (400 MHz,  $\text{CDCl}_3$ )  $\delta_{\text{H}}$  7.46 (d,  $J = 7.1$  Hz, 1H), 7.27 (d,  $J = 2.7$  Hz, 1H), 7.17 (dt,  $J = 15.0, 7.5$  Hz, 1H), 7.00 (s, 1H), 6.75 (s, 1H), 3.96 (s, 2H), 2.82-2.76 (m, 2H), 2.31 (s, 3H), 1.28 (dd,  $J = 14.7, 7.1$  Hz, 3H);  $^{13}\text{C}$  NMR (100 MHz,  $\text{CDCl}_3$ )  $\delta_{\text{C}}$  143.8 (C), 143.0 (C), 141.2 (C), 139.4 (C), 128.8 (C), 127.6 (CH), 126.3 (C), 125.1 (C), 124.6 (CH), 120.7 (CH), 113.8 (CH), 110.4 (CH), 53.6 ( $\text{CH}_2$ ), 40.2 ( $\text{CH}_3$ ), 23.3 ( $\text{CH}_2$ ), 14.9 ( $\text{CH}_3$ ).

## Amino acid and nucleotide sequences in this study

### >Amino acid\_His<sub>6</sub>-Wild type

MSDNGPQNQRNAPRITFGGPSDSTGSNQNGERSGARSKQRRPQGLPNNTASW  
FTALTQHGKEDLKFPRGQGVPIINTNSSPDDQIGYYRRATRRIRGGDGKMKDLS  
PRWYFYLLGTGPEAGLPYGANKDGIIWVATEGALNTPKDHIGTRNPANNAAI  
VLQLPQGTTLPKGFYAEGSRGGSQASSRSSSRN SSRNSTPGSSRGTSPARMA  
GNGGDAALALLLLDRLNQLESKMSGKGQQQQGQTVTKKSAAEASKKPRQK  
RTATKAYNVTQAFGRRGPEQTQGNFGDQELIRQGTDYKHWPQIAQFAPSASA  
FFGMSRIGMEVTPSGTWLTYTGAIKLDDKDPNFKDQVILLNKHIDAYKTFPPT  
EPKKDKKKKADETQALPQRQKKQQTVTLLPAADLDDFSKQLQQSMSSADST  
QAHHHHHH

**> Amino acid \_ His<sub>6</sub>-Mutant A**

MSDNGPQNQRNAPRITFGGPSDSTGSNQNGERSGARSKQRRPQGLPNNTASW  
FTALTQHGKEDLKFPRGQGVPIINTNSSPDDQIGYYRRATRRIRGGDGKMKDLS  
PRWAFYYLLGTGPEAGLPYGANKDGIIWVATEGALNTPKDHIGTANPANNAIIV  
LQLPQGTTLPKGFYAEGSRGGSQASSRSSSRN SSRNSTPGSSRGTSPARMAG  
NGGDAALALLLLDRLNQLESKMSGKGQQQQGQTVTKKSAAEASKKPRQKRT  
ATKAYNVTQAFGRRGPEQTQGNFGDQELIRQGTDYKHWPQIAQFAPSASAFF  
GMSRIGMEVTPSGTWLTYTGAIKLDDKDPNFKDQVILLNKHIDAYKTFPPTPEP  
KKDKKKKADETQALPQRQKKQQTVTLLPAADLDDFSKQLQQSMSSADSTQA  
HHHHHH

**> Amino acid \_ His<sub>6</sub>-Mutant B**

MSDNGPQNQRNAPRITFGGPSDSTGSNQNGERSGARSKQRRPQGLPNNTASW  
FTALTQHGKEDLKFPRGQGVPIINTNSSPDDQIGYYRRATRRIRGGDGKMKDLS  
PRWAFYYLLGTGPEAGLPYGANKDGIIWVATEGALNTPKDHIGTRNPANAAAIV  
LQLPQGTTLPKGFYAEGSRGGSQASSRSSSRN SSRNSTPGSSRGTSPARMAG  
NGGDAALALLLLDRLNQLESKMSGKGQQQQGQTVTKKSAAEASKKPRQKRT  
ATKAYNVTQAFGRRGPEQTQGNFGDQELIRQGTDYKHWPQIAQFAPSASAFF  
GMSRIGMEVTPSGTWLTYTGAIKLDDKDPNFKDQVILLNKHIDAYKTFPPTPEP  
KKDKKKKADETQALPQRQKKQQTVTLLPAADLDDFSKQLQQSMSSADSTQA  
HHHHHH

**> Amino acid \_ His<sub>6</sub>-Mutant C**

MSDNGPQNQRNAPRITFGGPSDSTGSNQNGERSGARSKQRRPQGLPNNTASW  
FTALTQHGEDLKFPRGQGVPIINTNSSPDDQIGYYRRATRIRGGDGKMKDLS  
PRWYFYYLGTGPEAGLPYGAAADGIAWVATEGALNTPKDHIGTRNPANNAI  
VLQLPQGTTLPKGFYAEGSRGGSQASSRSSSRNSSRNSTPGSSRGTSPARMA  
GNGGDAALALLLDRLNQLESKMSGKGQQQQGQTVTKKSAAEASKKPRQK  
RTATKAYNVTQAFGRRGPEQTQGNFGDQELIRQGTDYKHWPQIAQFAPSASA  
FFGMSRIGMEVTPSGTWLTYTGAIKLDDKDPNFKDQVILLNKHIDAYKTFPPT  
EPKKDKKKKADETQALPQRQKKQQTVTLLPAADLDDFSKQLQQSMSSADST  
QAHHHHHH

**>Nucleotide\_His<sub>6</sub>-Mutant A**

ATGTCAGATAATGGACCCCAAACAGAGGAACGCACCGCGTATCACCTT  
CGGCGGCCCGTCCGATTCTACGGGTCCAACCAGAATGGTGAACGTTCCG  
GTGCGCGTTCCAAGCAGAGACGTCCGCAGGGCCTGCCAAATAACACCGCA  
AGCTGGTTTACCGCGTTAACCCAGCATGGTAAAGAAGATTTAAAATTCCC  
GCGTGGTCAAGGTGTGCCGATTAACACCAATTCCTCGCCAGATGATCAGA  
TCGGGTATTACCGCCGCGCAACCCGTCGTATCCGTGGCGGTGACGGCAAG  
ATGAAAGACCTGAGCCCGCGTTGGGCTTTCTACTACCTGGGTACTGGTCC  
GGAGGCCGGCCTGCCTTATGGTGCGAATAAGGACGGTATTATCTGGGTTG  
CAACGGAAGGTGCTTTGAACACCCCGAAAGACCACATTGGTACTGCCAAC  
CCGGCGAACAACGCCGCCATCGTGCTGCAGCTCCCGCAAGGCACGACCTT  
GCCGAAGGGCTTTTATGCAGAGGGCAGCCGCGGTGGTTCTCAGGCGTCTT  
CTCGCTCTAGCAGCAGATCACGCAACAGCTCTCGCAACAGCACCCCGGT  
AGCAGCCGTGGTACGAGCCCGGCGCGTATGGCTGGTAACGGTGGCGACGC  
CGCTCTGGCTTTGTTGCTGCTGGATCGTCTGAATCAGCTGGAAAGCAAGAT  
GTCCGGTAAAGGCCAACAACAACAGGGACAGACCGTCACCAAGAAAAGC  
GCGGCGGAGGCGAGCAAGAAGCCGCGTCAAAGCGCACCCGCGACCAAAG  
CGTACAATGTTACCCAAGCGTTTGGCCGTCGTGGCCCGGAGCAGACCCAG  
GGCAACTTCGGCGATCAAGAACTGATTCGTCAGGGCACGGACTACAAACA  
TTGGCCGAGATTGCACAGTTTGGCTCCGTCGGCGAGCGCGTTTTTCGGTAT  
GTCCCGCATCGGCATGGAAGTTACCCCAAGTGGCACCTGGCTGACTTATA  
CCGGAGCTATCAAACCTGGACGATAAAGACCCGAATTTTAAGGACCAAGTT  
ATTCTGCTGAACAAACACATCGATGCTTACAAAACCTTCCCTCCGACCGA  
GCCGAAAAGGACAAAAAGAAAAGGCGGACGAGACGCAAGCCTTGCCC

CAACGTCAGAAAAAGCAACAGACGGTGACGCTGTTGCCGGCGGCCGATCT  
CGACGACTTCAGCAAGCAGCTTCAGCAAAGCATGAGCAGCGCGGATAGC  
ACCCAAGCTCATCATCATCATCATTA

**>Nucleotide\_ His<sub>6</sub>-Mutant B**

ATGTCAGATAATGGACCCCAAACCAGAGGAACGCACCGCGTATCACCTT  
CGGCGGCCCGTCCGATTCTACGGGTTCCAACCAGAATGGTGAACGTTCCG  
GTGCGCGTTCCAAGCAGAGACGTCCGCAGGGCCTGCCAAATAACACCGCA  
AGCTGGTTTACCGCGTTAACCAGCATGGTAAAGAAGATTTAAAATTCCC  
GCGTGGTCAAGGTGTGCCGATTAACACCAATTCCTCGCCAGATGATCAGA  
TCGGGTATTACCGCCGCGCAACCCGTCGTATCCGTGGCGGTGACGGCAAG  
ATGAAAGACCTGAGCCCGCGTTGGGCTTTCTACTACCTGGGTACTGGTCC  
GGAGGCCGGCCTGCCTTATGGTGCGAATAAGGACGGTATTATCTGGGTTG  
CAACGGAAGGTGCTTTGAACACCCCGAAAGACCACATTGGTACTCGCAAC  
CCGGCGAACGCTGCCGCCATCGTGCTGCAGCTCCCGCAAGGCACGACCTT  
GCCGAAGGGCTTTTATGCAGAGGGCAGCCGCGGTGGTTCTCAGGCGTCTT  
CTCGCTCTAGCAGCAGATCACGCAACAGCTCTCGCAACAGCACCCCGGGT  
AGCAGCCGTGGTACGAGCCCGGCGCGTATGGCTGGTAACGGTGGCGACGC  
CGCTCTGGCTTTGTTGCTGCTGGATCGTCTGAATCAGCTGGAAAGCAAGAT  
GTCCGGTAAAGGCCAACAACAACAGGGACAGACCGTCACCAAGAAAAGC  
GCGGCGGAGGCGAGCAAGAAGCCGCGTCAAAGCGCACCGCGACCAAAG  
CGTACAATGTTACCCAAGCGTTTGGCCGTCGTGGCCCGGAGCAGACCCAG  
GGCAACTTCGGCGATCAAGAAGTATTCGTCAGGGCACGGACTACAAACA  
TTGGCCGCAGATTGCACAGTTTGCTCCGTCGGCGAGCGCGTTTTTCGGTAT  
GTCCCGCATCGGCATGGAAGTTACCCCAAGTGGCACCTGGCTGACTTATA  
CCGGAGCTATCAAAGTGGACGATAAAGACCCGAATTTAAGGACCAAGTT  
ATTCTGCTGAACAAACACATCGATGCTTACAAAACCTTCCCTCCGACCGA  
GCCGAAAAAGGACAAAAAGAAAAAGGCGGACGAGACGCAAGCCTTGCCC  
CAACGTCAGAAAAAGCAACAGACGGTGACGCTGTTGCCGGCGGCCGATCT  
CGACGACTTCAGCAAGCAGCTTCAGCAAAGCATGAGCAGCGCGGATAGC  
ACCCAAGCTCATCATCATCATCATTA

**>Nucleotide\_ His<sub>6</sub>-Mutant C**

ATGTCAGATAATGGACCCCAAAACCAGAGGAACGCACCGCGTATCACCTT  
CGGCGGCCCGTCCGATTCTACGGGTCCAACCAGAATGGTGAACGTTCCG  
GTGCGCGTTCCAAGCAGAGACGTCCGCAGGGCCTGCCAAATAACACCGCA  
AGCTGGTTTACCGCGTTAACCCAGCATGGTAAAGAAGATTTAAAATTCCC  
GCGTGGTCAAGGTGTGCCGATTAACACCAATTCCTCGCCAGATGATCAGA  
TCGGGTATTACCGCCGCGCAACCCGTCGTATCCGTGGCGGTGACGGCAAG  
ATGAAAGACCTGAGCCCGCGTTGGTATTTCTACTACCTGGGTACTGGTCCG  
GAGGCCGGCCTGCCTTATGGTGCGGCCGCAGACGGTATTGCATGGGTTC  
AACGGAAGGTGCTTTGAACACCCCGAAAGACCACATTGGTACTCGCAACC  
CGGCGAACAACGCCGCCATCGTGCTGCAGCTCCCGCAAGGCACGACCTTG  
CCGAAGGGCTTTTATGCAGAGGGCAGCCGCGGTGGTTCTCAGGCGTCTTC  
TCGCTCTAGCAGCAGATCACGCAACAGCTCTCGCAACAGCACCCCGGGTA  
GCAGCCGTGGTACGAGCCCGGCGCGTATGGCTGGTAACGGTGGCGACGCC  
GCTCTGGCTTTGTTGCTGCTGGATCGTCTGAATCAGCTGGAAAGCAAGAT  
GTCCGGTAAAGGCCAACAACAACAGGGACAGACCGTCACCAAGAAAAGC  
GCGGCGGAGGCGAGCAAGAAGCCGCGTCAAAGCGCACCCGCGACCAAAG  
CGTACAATGTTACCCAAGCGTTTGGCCGTCGTGGCCCGGAGCAGACCCAG  
GGCAACTTCGGCGATCAAGAACTGATTCGTCAGGGCACGGACTACAAACA  
TTGGCCGCAGATTGCACAGTTTGCTCCGTCGGCGAGCGCGTTTTTCGGTAT  
GTCCCGCATCGGCATGGAAGTTACCCCAAGTGGCACCTGGCTGACTTATA  
CCGGAGCTATCAAACCTGGACGATAAAGACCCGAATTTTAAGGACCAAGTT  
ATTCTGCTGAACAAACACATCGATGCTTACAAAACCTTCCCTCCGACCGA  
GCCGAAAAGGACAAAAAGAAAAGGGCGGACGAGACGCAAGCCTTGCCC  
CAACGTCAGAAAAAGCAACAGACGGTGACGCTGTTGCCGGCGGCCGATCT  
CGACGACTTCAGCAAGCAGCTTCAGCAAAGCATGAGCAGCGCGGATAGC  
ACCCAAGCTCATCATCATCATCATTA



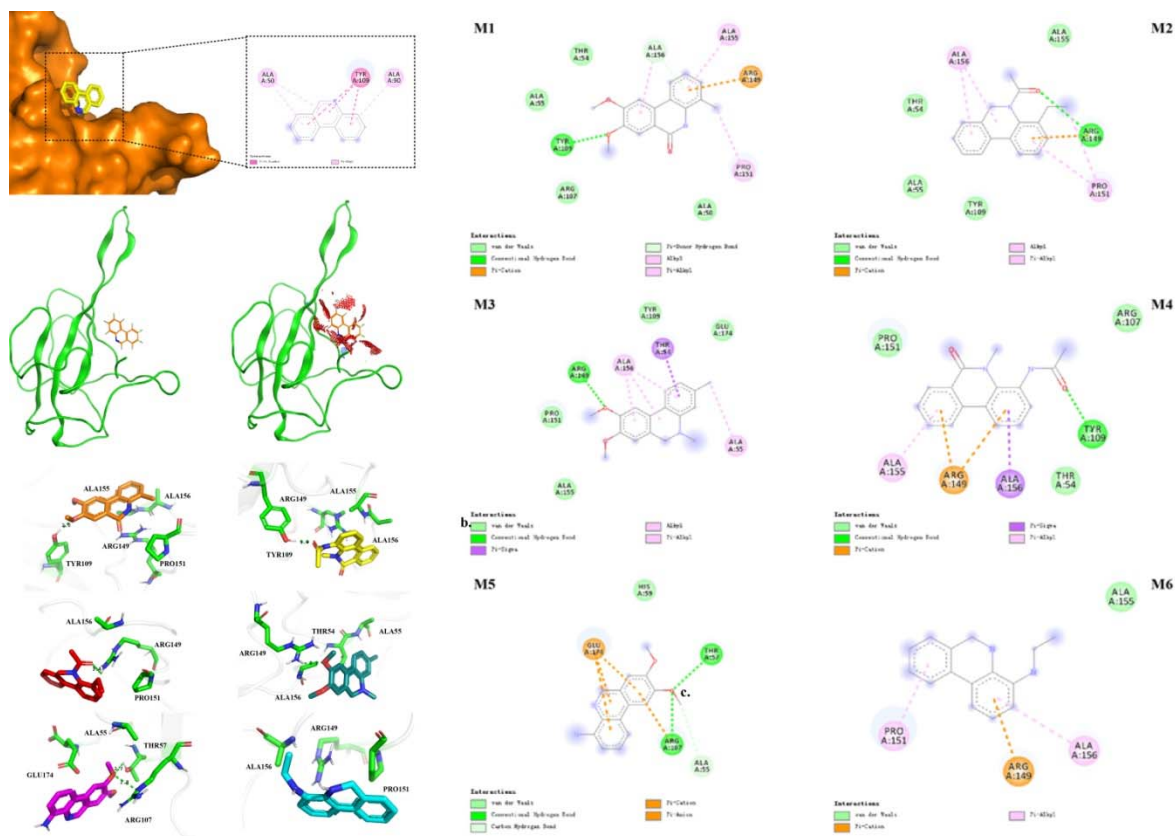

**Figure S1:** Two dimensional (2D) of binding modes of the six model moleculars (**M1-6**) with SARS-CoV-2 N-NTD. The estimated binding free energies are: -6.2 kcal/mol (**M1**), -5.6 kcal/mol (**M2**), -5.7 kcal/mol (**M3**), -5.8 kcal/mol (**M4**), -5.9 kcal/mol (**M5**), -5.2 kcal/mol (**M6**).

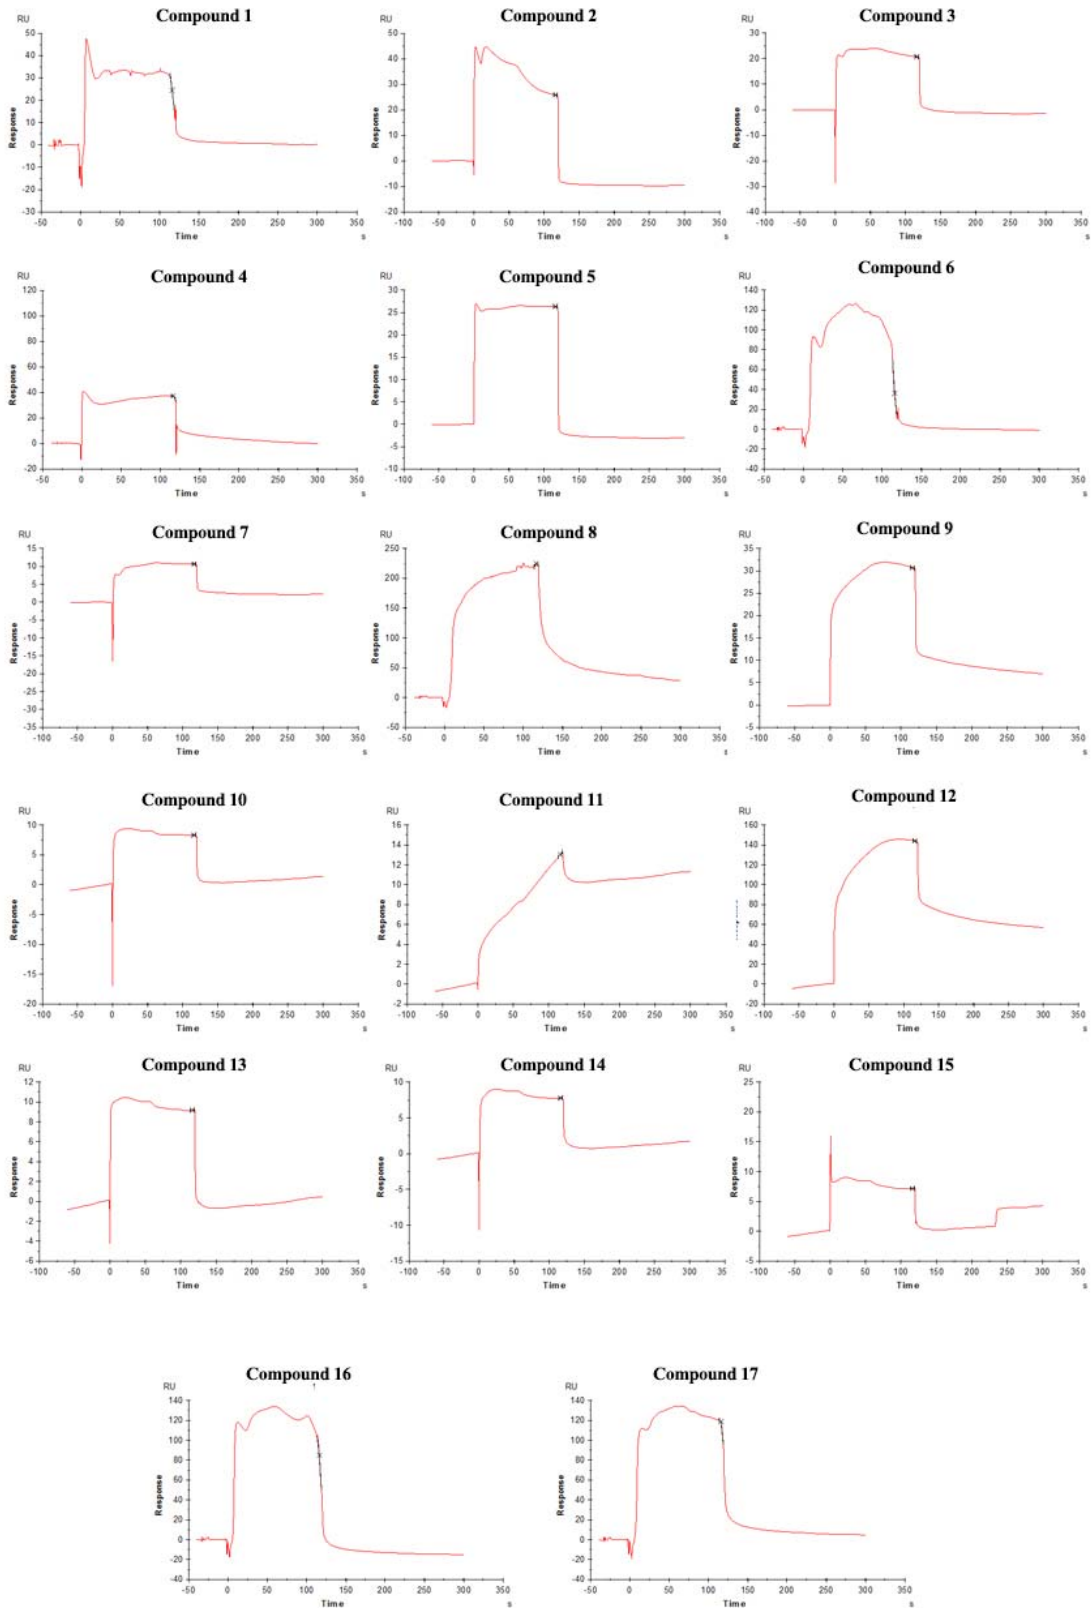

**Figure S2:** SARS-CoV-2 Npro binding level screening of compounds 1-17. Binding curves of immobilized SARS-CoV-2 Npro. Data are shown as red lines. Top four compounds were chosen as the hits.

### Pocket A

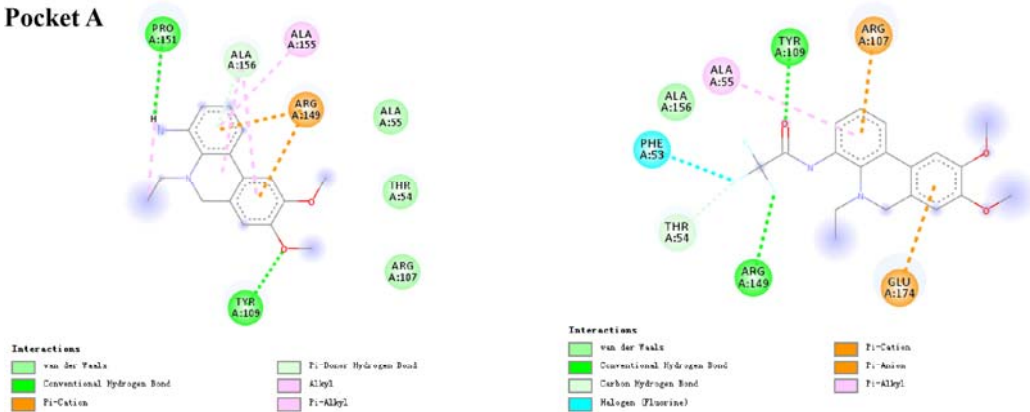

### Pocket B

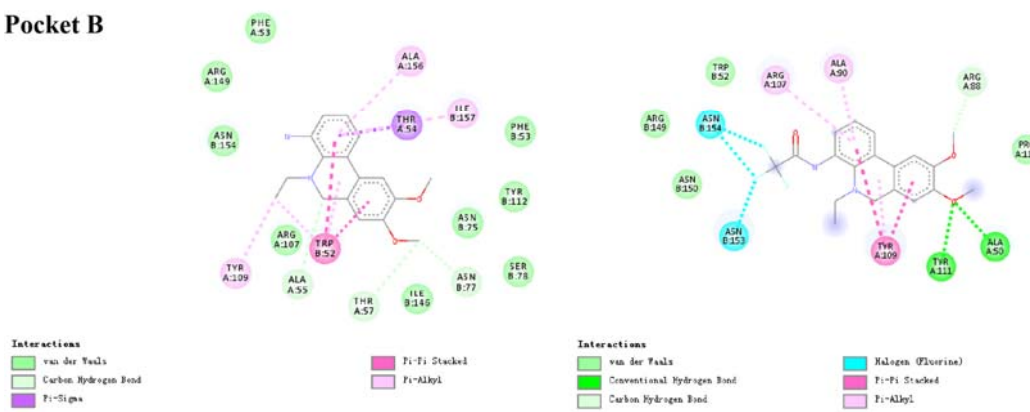

### Pocket C

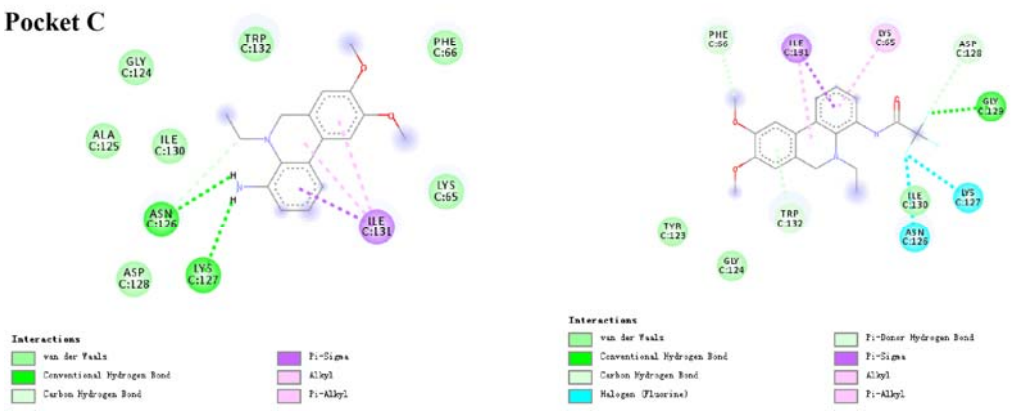

**Figure S3:** Docking modes of compound 12 (left) and 16 (right) with three potential pockets of SARS-CoV-2 Npro.

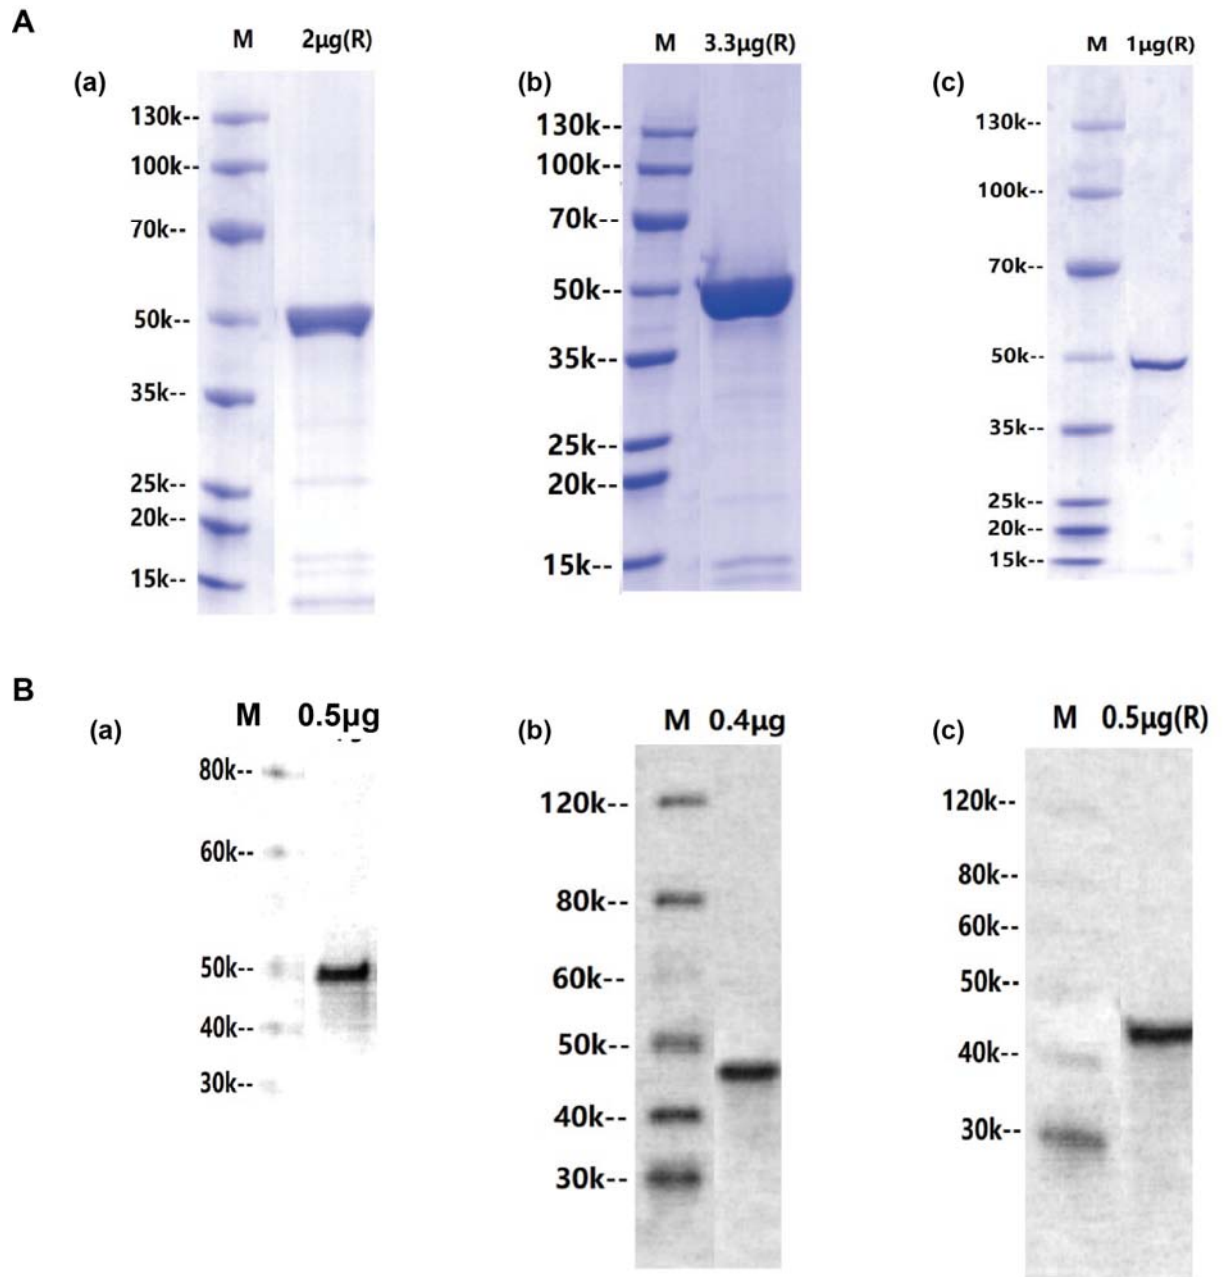

**Figure S4:** The analysis data of mutant A-C after purification. A: SDS-PAGE results. Lane M: Marker. Lane 1: purified protein. B: Western Blot results. Lane M: Marker (M00521, Genscript). Primary antibody: His-Tag Mouse Monoclonal Antibody (abs137964, absin). Second antibody: Goat Anti-Mouse (115-035-146, Jackson). (a): mutant A. (b): mutant B. (c): mutant C.

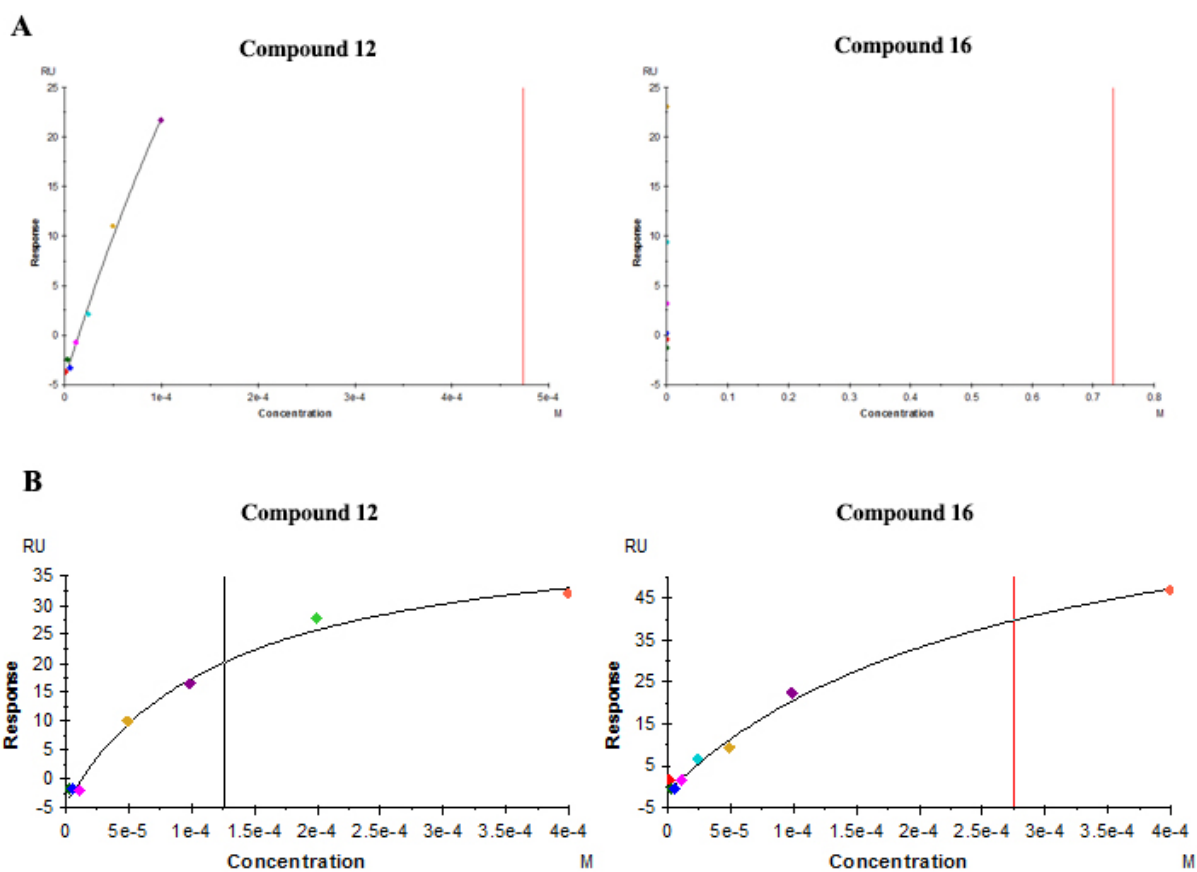

Figure S5: The affinity fitting curves of mutant A-B with compound **12** or **16**. **A**: Fitting curves of immobilized mutant A. **B**: Fitting curves of immobilized mutant B. When the affinity of the small molecule is weak, there is no kinetic curve, and the affinity model is used to fit, When the small molecule with strong affinity, the kinetics model is used to fit. (according to the GE Healthcare Laboratory Guideline).

Table S1. The SPR RU values of Phenanthridine Compounds.

|                   | Mean  | SD    |                    | Mean  | SD    |
|-------------------|-------|-------|--------------------|-------|-------|
| Compound <b>1</b> | 29.45 | 2.05  | Compound <b>10</b> | 13.14 | 1.14  |
| Compound <b>2</b> | 30.7  | 4     | Compound <b>11</b> | 17.71 | 1.11  |
| Compound <b>3</b> | 34.9  | 5.3   | Compound <b>12</b> | 144.9 | 11.35 |
| Compound <b>4</b> | 33.45 | 3.85  | Compound <b>13</b> | 14.3  | 1.5   |
| Compound <b>5</b> | 34.95 | 0.25  | Compound <b>14</b> | 10.6  | 0.9   |
| Compound <b>6</b> | 57.5  | 4.8   | Compound <b>15</b> | 11.85 | 1.05  |
| Compound <b>7</b> | 22    | 2.5   | Compound <b>16</b> | 101   | 7.5   |
| Compound <b>8</b> | 210.7 | 10.58 | Compound <b>17</b> | 125.1 | 6.4   |
| Compound <b>9</b> | 23.14 | 0.96  |                    |       |       |

Table S2. The Viability of SARS-Cov-2 Infected Cell After Treatment of Phenanthridine Compounds

| Concentration<br>( $\mu\text{M}$ ) | Compound 12 |        | Compound 16 |       | Remdesivir |        |
|------------------------------------|-------------|--------|-------------|-------|------------|--------|
|                                    | Mean        | SD     | Mean        | SD    | Mean       | SD     |
| 0.064                              | 42.07       | 0.5515 | 49.07       | 2.164 | 16.557     | 7.279  |
| 0.32                               | 44.04       | 3.567  | 66.95       | 28.14 | 22.283     | 4.497  |
| 1.6                                | 69.61       | 23.35  | 84.14       | 36.77 | 56.674     | 20.297 |
| 8                                  | 73.32       | 22.93  | 82.36       | 20.35 | 103.720    | 2.962  |
| 40                                 | 87.56       | 1.682  | 87.41       | 6.437 | 97.265     | 0.155  |
| 200                                | 97.85       | 2.289  | 99.6        | 6.335 | 81.893     | 8.897  |

Table S3 The Inhibition of Phenanthridine Compounds on SARS-Cov-2

| Concentration<br>( $\mu$ M) | Compound <b>12</b> |       | Compound <b>16</b> |       |
|-----------------------------|--------------------|-------|--------------------|-------|
|                             | Mean               | SD    | Mean               | SD    |
| 3.125                       | 45.99              | 17.76 | 56.23              | 24.35 |
| 6.25                        | 53.79              | 23.2  | 54.85              | 18.31 |
| 12.5                        | 61.27              | 32.45 | 68.79              | 13.71 |
| 50                          | 76.41              | 15.07 | 68.9               | 1.378 |
| 100                         | 72.33              | 12.93 | 97.83              | 2.39  |



Table S4. The  $EC_{50}$  Value of Compound **12** and **16**.

|                    | $EC_{50}$ ( $\mu$ M) | $CC_{50}$ ( $\mu$ M) | <sup>a</sup> SI |
|--------------------|----------------------|----------------------|-----------------|
| Compound <b>12</b> | 3.69                 | >200                 | >50             |
| Compound <b>16</b> | 2.18                 | >200                 | >90             |
| Remdesivir         | 1.21                 | >200                 | >150            |

<sup>a</sup> SI=  $CC_{50} / EC_{50}$

## References

1. Chen, D. Z.; Zhang, H.; Jing, C. X.; He, X. L.; Yang, B. J.; Cai, J. Y.; Zhou, Y. F.; Song, X. M.; Li, L.; Hao, X. J., Efficient synthesis of new phenanthridine Wnt/beta-catenin signaling pathway agonists. *Eur J Med Chem* **2018**, *157*, 1491-1499.
2. Ferraccioli, R.; Carezzi, D.; Rombola, O.; Catellani, M., Synthesis of 6-phenanthridinones and their heterocyclic analogues through palladium-catalyzed sequential aryl-aryl and N-aryl coupling. *Org Lett* **2004**, *6* (25), 4759-4762.
3. Chen, D. Z.; Fan, S. R.; Yang, B. J.; Yao, H. C.; Wang, Y. T.; Cai, J. Y.; Jing, C. X.; Pan, Z. H.; Luo, M.; Yuze, Y. Q.; Liu, G. J.; Hao, X. J., Phenanthridine Derivative Host Heat Shock Cognate 70 Down-Regulators as Porcine Epidemic Diarrhea Virus Inhibitors. *J Nat Prod* **2021**, *84* (4), 1175-1184.
